# Supplementary material for: Electroacupuncture for stress-predominant mixed urinary incontinence: a protocol for a three-armed randomised controlled trial
Source: PubMed Central journal article supplement — BMJ Open. 2021 Jan 7;11(1):e038452. doi: 10.1136/bmjopen-2020-038452 (PMC7797267; doi:10.1136/bmjopen-2020-038452), 2021-01-07
Supplement: bmjopen-2020-038452.draft_revisions.pdf [file bmjopen-2020-038452.draft_revisions.pdf]

# BMJ Open

BMJ Open is committed to open peer review. As part of this commitment we make the peer review history of every article we publish publicly available.

When an article is published we post the peer reviewers' comments and the authors' responses online. We also post the versions of the paper that were used during peer review. These are the versions that the peer review comments apply to.

The versions of the paper that follow are the versions that were submitted during the peer review process. They are not the versions of record or the final published versions. They should not be cited or distributed as the published version of this manuscript.

BMJ Open is an open access journal and the full, final, typeset and author-corrected version of record of the manuscript is available on our site with no access controls, subscription charges or pay-per-view fees (<http://bmjopen.bmj.com>).

If you have any questions on BMJ Open's open peer review process please email [info.bmjopen@bmj.com](mailto:info.bmjopen@bmj.com)

# BMJ Open

## Electroacupuncture for stress-predominant mixed urinary incontinence: a protocol for a three-armed randomized controlled trial

|                               |                                                                                                                                                                                                                                                                                                                                                                                                                                                                                                                                  |
|-------------------------------|----------------------------------------------------------------------------------------------------------------------------------------------------------------------------------------------------------------------------------------------------------------------------------------------------------------------------------------------------------------------------------------------------------------------------------------------------------------------------------------------------------------------------------|
| Journal:                      | <i>BMJ Open</i>                                                                                                                                                                                                                                                                                                                                                                                                                                                                                                                  |
| Manuscript ID                 | bmjopen-2020-038452                                                                                                                                                                                                                                                                                                                                                                                                                                                                                                              |
| Article Type:                 | Protocol                                                                                                                                                                                                                                                                                                                                                                                                                                                                                                                         |
| Date Submitted by the Author: | 11-Mar-2020                                                                                                                                                                                                                                                                                                                                                                                                                                                                                                                      |
| Complete List of Authors:     | Sun, Yuanjie; Guang'an Men Hospital, China Academy of Chinese Medical Sciences<br>Liu, Yan; Key Laboratory of Chinese Internal Medicine of Ministry of Education, Dongzhimen Hospital, Beijing University of Chinese Medicine<br>Chen, Huan; Guang'anmen Hospital, China Academy of Chinese Medical Sciences<br>Yan, Yan; Guang'anmen Hospital, China Academy of Chinese Medical Sciences<br>Liu, zhishun; Guang'an men Hospital Affiliated to China Academy of Chinese Medical Sciences, acupuncture and moxibustion department |
| Keywords:                     | Urinary incontinences < UROLOGY, Bladder disorders < UROLOGY, COMPLEMENTARY MEDICINE                                                                                                                                                                                                                                                                                                                                                                                                                                             |
|                               |                                                                                                                                                                                                                                                                                                                                                                                                                                                                                                                                  |

SCHOLARONE™  
Manuscripts

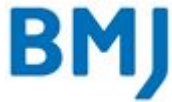

I, the Submitting Author has the right to grant and does grant on behalf of all authors of the Work (as defined in the below author licence), an exclusive licence and/or a non-exclusive licence for contributions from authors who are: i) UK Crown employees; ii) where BMJ has agreed a CC-BY licence shall apply, and/or iii) in accordance with the terms applicable for US Federal Government officers or employees acting as part of their official duties; on a worldwide, perpetual, irrevocable, royalty-free basis to BMJ Publishing Group Ltd ("BMJ") its licensees and where the relevant Journal is co-owned by BMJ to the co-owners of the Journal, to publish the Work in this journal and any other BMJ products and to exploit all rights, as set out in our [licence](#).

The Submitting Author accepts and understands that any supply made under these terms is made by BMJ to the Submitting Author unless you are acting as an employee on behalf of your employer or a postgraduate student of an affiliated institution which is paying any applicable article publishing charge ("APC") for Open Access articles. Where the Submitting Author wishes to make the Work available on an Open Access basis (and intends to pay the relevant APC), the terms of reuse of such Open Access shall be governed by a Creative Commons licence – details of these licences and which [Creative Commons](#) licence will apply to this Work are set out in our licence referred to above.

Other than as permitted in any relevant BMJ Author's Self Archiving Policies, I confirm this Work has not been accepted for publication elsewhere, is not being considered for publication elsewhere and does not duplicate material already published. I confirm all authors consent to publication of this Work and authorise the granting of this licence.

1  
2  
3  
4 1 Title page:  
5  
6 2

7  
8 3 Article title:  
9

10 4 **Electroacupuncture for stress-predominant mixed urinary**  
11 **incontinence: a protocol for a three-armed randomized controlled**  
12 **trial**  
13  
14 6

15  
16 7 Yuanjie Sun, MD<sup>1\*</sup>; Yan Liu, MD<sup>2\*</sup>; Huan Chen, MD, MSc<sup>1</sup>; Yan Yan, BS<sup>1</sup>; Zhishun  
17  
18 8 Liu, MD, PhD<sup>1†</sup>  
19

20 9  
21  
22 10 1 Department of Acupuncture, Guang'anmen Hospital, China Academy of Chinese  
23  
24 11 Medical Sciences, Beijing, China

25  
26 12 2 Key Laboratory of Chinese Internal Medicine of Ministry of Education,  
27  
28 13 Dongzhimen Hospital, Beijing University of Chinese Medicine, Beijing, China  
29

30 14  
31  
32 15 \*Yuanjie Sun and Yan Liu contributed equally to this work and shared the first author  
33  
34 16 position.  
35

36 17  
37  
38 18 †Corresponding author: Department of Acupuncture, Guang'anmen Hospital, China  
39  
40 19 Academy of Chinese Medical Sciences, Beijing, China. Tel. +86 10 88002331; Fax:  
41  
42 20 +86 10 88001241; E-mail address: zhishunjournal@163.com (Zhishun Liu).  
43

44 21 **Running title:** acupuncture for stress-predominant mixed urinary incontinence  
45  
46 22

47  
48 23 **Word count:** abstract 223; main text 2797  
49  
50  
51  
52  
53  
54  
55  
56  
57  
58  
59  
60

## 24 **Abstract**

25 **Introduction:** There is a lack of evidence targeted at stress-predominant mixed  
26 urinary incontinence (MUI) at present. Acupuncture might help to relieve the  
27 incontinence symptoms. We plan to conduct a multi-center, three-armed, randomized  
28 controlled to investigate the efficacy of electroacupuncture (EA) on women with  
29 stress-predominant MUI.

30 **Methods and analysis:** The trials will be conducted in 5 recruitment centers in China.  
31 232 eligible participants will be randomly assigned to EA, sham electroacupuncture  
32 (SE) or Waiting List (WL) group, at 2:1:1 ratio, to receive 8-week EA/SA with 24-  
33 week follow-up, or 20-week watchful waiting. The primary outcome is defined as the  
34 proportion of participants with at least 50% reduction in incontinence episode  
35 frequency (IEF) from baseline at week 8. Secondary outcomes will mainly be  
36 measured at weeks 4, 8, 12, 20 and 32 by 3-day voiding diary, International  
37 Consultation on Incontinence Questionnaire-short form (ICIQ-SF) and 1-hour pad  
38 test. All outcomes will be analyzed in intention to treat population (defined as  
39 participants randomized) with a two-sided *P* value of less than .05 considered  
40 significant.

41 **Ethics and dissemination:** The protocol was approved for by Guang'anmen Hospital  
42 Institution of Review Board (2019-241-KY). Detailed information of the trial will be  
43 informed to the participants and written informed content will be obtained from every  
44 participant before randomization. Results of the trial will be expected to be published  
45 on a peer-reviewed journal.

46 **Key words:** Acupuncture; Mixed urinary incontinence; Female;

47 **Trial registration:** Clinicaltrials.gov identifier: NCT04299932

## 48 **Strengths and limitations of this study**

- 49 ➤ The first randomized controlled trial to investigate the efficacy of acupuncture on  
50 stress-predominant mixed urinary incontinence.
- 51 ➤ Sham control and no intervention control are designed to eliminate the influence

- 1  
2  
3  
4 52 of placebo effects and disease's nature course on efficacy of acupuncture;  
5  
6 53 ➤ Minimal electroacupuncture serve as a sham intervention to blind participants in  
7  
8 54 electroacupuncture and sham electroacupuncture groups.  
9  
10 55 ➤ One limitation is that participants in waiting list group and acupuncturists cannot  
11  
12 56 be blinded.  
13  
14  
15  
16  
17  
18  
19  
20  
21  
22  
23  
24  
25  
26  
27  
28  
29  
30  
31  
32  
33  
34  
35  
36  
37  
38  
39  
40  
41  
42  
43  
44  
45  
46  
47  
48  
49  
50  
51  
52  
53  
54  
55  
56  
57  
58  
59  
60

For peer review only

## 57 INTRODUCTION

58 Mixed urinary incontinence (MUI) is a condition where incontinence occurs with  
59 both physical exertion and urgency.<sup>1</sup> Compared with pure urinary incontinence (UI),  
60 MUI tends to present with more severe symptoms and put greater burden on the  
61 health of individual and economy of society.<sup>2</sup> An estimate of 21%-33% females in the  
62 world<sup>3</sup> and 9.4% females in China<sup>4</sup> are troubled with MUI, while the report and  
63 treatment rates are under one second<sup>5</sup>.

64 Stress-predominant MUI mainly constitutes of stress component, featuring leakage  
65 on increased abdominal pressure, such as exertion, sneeze or cough. Though leakage  
66 with urgency also exists, stress incontinence episode frequency (IEF) outnumbered  
67 50% of total IEF.<sup>6</sup>

68 Current European Association of Urology (EAU) guideline on incontinence  
69 recommends to initiate treatment targeted at predominant component of MUI.<sup>7 8</sup>  
70 However, as to whether the interventions for stress urinary incontinence (SUI) can be  
71 effectively generalized to stress-predominant MUI, there is still no powerful evidence  
72 to support it.<sup>6</sup> Systematic reviews indicated that pelvic floor muscle training (PFMT)  
73 can alleviate the symptoms of SUI patients, but the effects of it may decrease to some  
74 degree in the treatment of MUI.<sup>9</sup> For moderate to severe SUI, surgery might be more  
75 useful than PFMT<sup>10</sup>, and long-term follow-up revealed that about half patients  
76 conducting PFMT will turn to surgery for help at last<sup>11</sup>. When it refers to surgery for  
77 MUI, other therapies might need to be combined with to conquer the urgency  
78 component.<sup>12</sup> In addition, the existence of urgency symptoms might aggravate after  
79 surgery<sup>13</sup>, and even reduce the success rate of operation<sup>14</sup>. Considering all those  
80 reasons, it is necessary to seek for interventions specific to stress-predominant MUI.

81 Results of previous studies indicated that acupuncture might help to relieve the  
82 incontinence symptoms.<sup>15 16</sup> It is proven effective in reducing leakage amount of pure  
83 SUI patients<sup>15</sup> and reducing IEF of MUI patients.<sup>16</sup> Future analysis into the results of  
84 the two trials showed that EA can relieve the symptoms of stress-related urinary

1  
2  
3  
4 85 incontinence.<sup>17</sup> Considering the fact that the two trials weren't focused on stress-  
5  
6 86 predominant MUI patients specifically, we plan to conduct this multi-center, three-  
7  
8 87 armed, randomized controlled to evaluate the efficacy of EA, compared with sham  
9  
10 88 electroacupuncture (SA) and waiting list (WL) on participants with stress-  
11  
12 89 predominant MUI.

## 13 14 90 **METHODS AND ANALYSIS**

### 15 16 91 **Hypotheses**

17  
18 92 Our primary hypothesis is that, the effects of EA is superior to SA in improving  
19  
20 93 proportion of stress-predominant MUI participants with at least 50% reduction of  
21  
22 94 stress IEF from baseline at week 8. Our secondary hypothesis is that the effects of EA  
23  
24 95 is superior to WL in improving the proportion mentioned above at week 8.

### 25 26 96 **Study design**

27  
28 97 This is a three-armed, randomized, SA and WL-controlled trial conducted in five  
29  
30 98 recruitment centers, that is Guang'anmen Hospital, China Academy of Chinese  
31  
32 99 Medical Sciences; Hengyang Hospital Affiliated to Hunan University of Chinese  
33  
34 100 Medicine; Yantai Hospital of Traditional Chinese Medicine; The third affiliated  
35  
36 101 hospital of Beijing university of Chinese Medicine and Jiangxi Provincial Hospital of  
37  
38 102 traditional Chinese Medicine. Participants will be enrolled from both hospitals and  
39  
40 103 communities.

41  
42 104 The study durations are 33 weeks for participants in EA and SA group with one-  
43  
44 105 week baseline assessment, 8-week treatment and 24-week follow-up, while 21 weeks  
45  
46 106 for participants in WL group, with one-week baseline assessment and 20-week  
47  
48 107 follow-up (Figure 1. Flow Chart). Participations in EA and SA groups, outcome  
49  
50 108 assessors, data managers and statisticians will be blinded to the group allocations,  
51  
52 109 while acupuncturists and participants in WL group will not be blinded for obvious  
53  
54 110 reasons.

### 55 56 111 **Inclusion criteria**

57  
58 112 1) Diagnosis of MUI by the coexistence of SUI and UII symptoms in accordance  
59  
60



- 1  
2  
3  
4 113 with EAU guideline<sup>8</sup>;
- 5  
6 114 2) Female participants aged between 18 and 80;
- 7  
8 115 3) Stress index > urge index in accordance with Medical, epidemiologic, and social  
9  
10 116 aspects of Aging(MESA) questionnaire<sup>18</sup>;
- 11  
12 117 4) SUI episodes outnumber 50% total IEF documented in 3-day voiding diary;
- 13  
14 118 5) Less than 12 micturition episodes in average 24 hours documented in 3-day  
15  
16 119 voiding diary;
- 17  
18 120 6) Positive cough stress test;
- 19  
20 121 7) Urine leakage > 1 g in 1-hour pad test<sup>19</sup>;
- 21  
22 122 8) Voluntary participation in the trial and signed written informed content.
- 23  
24 123 Participants meeting all these eight criteria might be able to be recruited in the trial.

25  
26 124 **Exclusion criteria**

- 27  
28 125 1) Urgency-predominant MUI, pure SUI, pure UUI, overflow UI and neurogenic  
29  
30 126 bladder;
- 31  
32 127 2) Uncontrolled symptomatic urinary tract infection;
- 33  
34 128 3) Tumor in urinary system and pelvic organ;
- 35  
36 129 4) Pelvic organ prolapse  $\geq$  degree II ;
- 37  
38 130 5) Residual urine volume  $\geq$  100ml;
- 39  
40 131 6) History of treatments targeted at UI, such as acupuncture and PFMT;
- 41  
42 132 7) History of surgery targeted at UI or in pelvic floor, including hysterectomy;
- 43  
44 133 8) Uncontrolled diabetes or severe high blood pressure;
- 45  
46 134 9) Nervous system diseases that may hamper the function of urinary system, such as  
47  
48 135 Multiple sclerosis, Alzheimer's disease, Parkinson's disease, spinal cord injury,  
49  
50 136 cauda equina nerve injury, or multiple system atrophy;
- 51  
52 137 10) Severe heart, lung, brain, liver, kidney, mental illness, coagulation dysfunction or  
53  
54 138 with obvious cognitive dysfunction
- 55  
56 139 11) Installed cardiac pacemaker;
- 57  
58 140 12) Inconvenient or unable to walk, run, go up and down stairs;
- 59  
60

- 1  
2  
3  
4 141 13) Allergy to metal, severely fear of acupuncture needles or unbearable to EA;  
5  
6 142 14) Pregnant at present, plan to conceive in future one year, at lactation period or  
7  
8 143 within 12 months after childbirth.

9  
10 144 Participants with either situation mentioned above will not be enrolled in the trial.

#### 11 145 **Randomization and allocation concealment**

12  
13  
14 146 The randomization allocation sequence will be produced by a third independent  
15  
16 147 party (Linkermed Technology Co., Ltd. [Beijing, China]). Eligible participants will be  
17  
18 148 randomly assigned into EA group, SA group or WL group at 2:1:1 ratio, with varied  
19  
20 149 blocks and using recruitment sites as stratification factor. The randomization number  
21  
22 150 and group allocation will be acquired by acupuncturists in each recruitment site by  
23  
24 151 logging in the Central Randomization System and typing in basic information of  
25  
26 152 eligible participants.

#### 27 153 **Interventions**

28  
29  
30 154 Participants in EA group will receive stimulation at bilateral BL33 (Zhongliao),  
31  
32 155 BL35 (Huiyang) and SP6 (Sanyinjiao). BL 33 is located in the third posterior sacral  
33  
34 156 foramen; BL 35, 0.5 cun ( $\approx 10\text{mm}$ ) lateral to the extremity of the coccyx; and SP6  
35  
36 157 posterior to the medial border of the tibia, 3 cun superior to the prominence of the  
37  
38 158 medial malleolus.<sup>20</sup> Bilateral BL33 will be inserted by acupuncture needles (Huatuo,  
39  
40 159 Suzhou Medical Appliance) of 0.30×75mm size at the angle of 45° , inward and  
41  
42 160 downward, till the depth of 60-70mm. Bilateral BL35 will be inserted by needles of  
43  
44 161 0.30×75mm size, slightly outward and upward, till the depth of 60-70mm. Bilateral  
45  
46 162 SP6 will be inserted by needles of 0.30×40mm till the depth of 25-30mm. All the  
47  
48 163 needles will be lifted, thrust and twisted evenly for three times, right after insetion,  
49  
50 164 to induce the sensation of *deqi*. Electronic acupuncture apparatus (Yingdi KWD 808 I  
51  
52 165 electro pulse acupuncture therapeutic apparatus, Changzhou Yingdi Electronic  
53  
54 166 Medical Device Co., Ltd) will be connected to the three pairs of needles transversally,  
55  
56 167 with continuous wave of 20Hz, electric current of 2mA-6.5mA for BL33 and BL35,  
57  
58 168 and 1mA-3.5mA for SP6. The EA stimulation will last 30mins for each session, 3  
59  
60

1  
2  
3  
4 169 sessions a week (ideally every other day) for a succession of 8 weeks.  
5  
6 170 Participants in SA group will receive minimal stimulation at bilateral sham BL33  
7  
8 171 (Zhongliao), BL35 (Huiyang) and SP6 (Sanyinjiao). Sham BL33 is in the area of 1  
9  
10 172 cun ( $\approx 20$ mm) horizontally outside BL33; sham BL35, 1 cun ( $\approx 20$ mm) horizontally  
11  
12 173 outside BL35; Sham SP6, in the middle of SP6 and tendons. The three pairs of  
13  
14 174 acupoints will be inserted by acupuncture needles of 0.30×40mm size to a depth of 2-  
15  
16 175 3mm till the needles can stand still. No manipulations will be conducted, and the  
17  
18 176 sensation of *deqi* will not be induced. Electronic acupuncture apparatus will be  
19  
20 177 connected to the three pairs of needles transversally, with continuous wave of 20Hz  
21  
22 178 and minimal electric current (ideally at a degree which participant can just percept). In  
23  
24 179 about 30 seconds, the electric current will be turned off, leaving the indicator light and  
25  
26 180 ticking sound on. The treatment sessions are similar to those in EA group.

27  
28 181 Participants will be told ahead of time that they may receive either traditional EA  
29  
30 182 treatment, or modern EA treatment; they might not feel the electrical stimulation  
31  
32 183 during the process out of body adaption. To evaluate the success of blindness, within  
33  
34 184 5 minutes after the last treatment at week 8, participants in both EA and SA groups  
35  
36 185 will be asked to answer the question do you think you have received traditional EA,  
37  
38 186 and choose the answer between the options of Yes or No.

39  
40 187 Participants in WL group will not receive active treatments. After the trial, they  
41  
42 188 will receive 24-session EA treatment as mentioned above as compensation.

43  
44 189 Participants in the three groups will receive handbook of healthcare education and  
45  
46 190 advice on lifestyle modification, such as the conditions of exercise, fluid intake,  
47  
48 191 weight, smoking, constipation, urinary tract infection, lifting, and respiratory  
49  
50 192 symptoms, etc. The lifestyles changed accordingly will be documented in case report  
51  
52 193 form. During the process, participants are not allowed to take other specialized  
53  
54 194 medication and treatments for UI. Any medications that might influence the function  
55  
56 195 of lower urinary tract function should be documented in case report form.

## 57 196 **Outcomes**

1  
2  
3  
4 197 **Primary outcome**

5 198 In this trial, the primary outcome is defined as the proportion of participants with at  
6  
7 199 least 50% reduction in IEF from baseline, measured by 3-day voiding diary at weeks  
8  
9 200 8. Three-diary voiding diary is a reliable and validated tool for urinary incontinence in  
10  
11 201 both clinic and research, without placing great burden on participants.<sup>21</sup> In 3-day  
12  
13 202 voiding diary, IEF of different types, micturition and nocturia episodes, fluid intake,  
14  
15 203 and pad consumptions will all be documented. Participants are required to fill in the  
16  
17 204 diary in baseline assessment period (week 0), weeks 4, weeks 8, weeks 20 and weeks  
18  
19 205 32 (participants in EA and SA group only).

20  
21  
22 206 **Secondary outcomes**

23  
24 207 Secondary outcomes will be measured by 3-day voiding diary, International  
25  
26 208 Consultation on Incontinence Questionnaire-short form (ICIQ-SF), 1-hour pad test  
27  
28 209 and patient global impression of improvement (PGI-I). (Figure 2. Study schedule)

29  
30 210 ICIQ-SF questionnaire is a validated questionnaire to assess the severity of  
31  
32 211 incontinence symptoms and influence on QoL in the past four weeks. The  
33  
34 212 questionnaire includes items of IEF, urinary leakage amount and general influence on  
35  
36 213 life to be scored. Total number of the score ranges from 1 to 21, with higher scores  
37  
38 214 representing greater severity and 2.52 as minimal clinically important  
39  
40 215 differences<sup>22</sup>. Participants will complete the Chinese-version questionnaire<sup>23</sup> at  
41  
42 216 baseline assessment period (week 0), weeks 4, weeks 8, weeks 20 and weeks 32  
43  
44 217 (participants in EA and SA group only).

45  
46 218 One-hour pad test is the only tool standardized with a set protocol to measure the  
47  
48 219 urinary leakage<sup>19</sup>. Participants will be instructed to drink 500 ml solid-free water,  
49  
50 220 and perform a series of activities including standing and sitting, coughing, running,  
51  
52 221 picking up a coin and putting hands under water. The leakage amount in one hour will  
53  
54 222 be measured via pad.<sup>24</sup> Participants will conduct 1-hour pad test in baseline  
55  
56 223 assessment period (week 0) and weeks 8.

57  
58 224 PGI-I is a global index, with only one item, used to rate the participants' subject  
59  
60

1  
2  
3  
4 225 perception on symptom improvement. In weeks 8 and 20, participants in the three  
5  
6 226 groups will describe their impression from very much better to very much worse.<sup>25</sup>  
7  
8 227 Improvement was considered to be clinically significant if the participant's response  
9  
10 228 is "much better" or "very much better".

11 229 To better evaluate the efficacy and safety of acupuncture, participants expectations  
12  
13 230 towards outcome and beliefs on acupuncture will also be assessed. Adverse events  
14  
15 231 and severe adverse events will be documented in case report form throughout the trial.  
16  
17 232 Acupuncturists in each site will decide whether the events are related to the treatments  
18  
19 233 or not.

### 22 234 **Quality control and data management**

23  
24 235 To ensure the quality of the study, personnel in recruitment sites will be trained by  
25  
26 236 the principal investigator (ZS Liu) on the details of the protocol and manipulating  
27  
28 237 methods. Acupuncture in both EA and SA groups are required to be conducted by  
29  
30 238 licensed acupuncturists with at least two-year clinical experience. In each site, at least  
31  
32 239 two acupuncturists are needed for rotation, while the treatment of each participant  
33  
34 240 should be restricted to one specific doctor.

35  
36 241 Measures will be taken to improve the compliance. The same participants should be  
37  
38 242 taken charged by the same outcome assessor/acupuncturist throughout the trial,  
39  
40 243 including instruction on the documentation of voiding diary, explanation on the  
41  
42 244 contents of handbook if necessary, and informing the assessment time by phone or  
43  
44 245 we-chat.

45  
46 246 The data will be recorded in paper CRF first, and typed into EDC system within  
47  
48 247 one week, so that the information can be traced back, monitored by CRA and system  
49  
50 248 in time, and supplemented without delay, if missing or inaccuracy. In follow-up  
51  
52 249 period, missing data in voiding diary can be asked by phone rather than in person. The  
53  
54 250 database will be protected by a password and only the principal investigator will have  
55  
56 251 access to the final dataset. Data are available upon reasonable request to the principal  
57  
58 252 investigator, excluding the private information of patients.

### 253 **Sample size**

254 A sample size of 232 participants will provide the trial with 80% power to detect a  
255 between-group difference of about 23% of participants with at least 50% reduction  
256 from baseline in the stress IEF measured by 3-day voiding diary with a two-sided  
257 significance level of 0.05 and 10% dropouts, assuming that a reduction rate of 25%  
258 for the IEF in the SA group on the basis of previous study<sup>15 16</sup>.

### 259 **Statistical analysis**

260 For primary hypothesis, we will compare the proportion of participants with at least  
261 50% reduction in mean 24-hour stress IEF at week 8 among the three groups. The  
262 primary outcome analysis will use the Cochran-Mantel-Haenszel (CMH) test to  
263 compare the rate of participants with at least 50% reduction in stress IEF at week 8  
264 between the EA group and the WL group. If this analysis is significant, the  
265 hierarchical testing will be used the EA group versus the SA group.

266 For other categorical variables, comparisons between treatment groups will be  
267 assessed using the Fisher exact test or Chi-squared test as appropriate. We will use the  
268 *t* test or Wilcoxon rank-sum test to analyze change of urinary leakage amount from  
269 baseline, change of mean 24-hour IEF from baseline, change of total and sub-score of  
270 ICIQ-SF from baseline, change of 24-h urgency episodes from baseline, and other  
271 continuous variables. Chi-square or Fisher's exact tests will be used to compare the  
272 frequency of AEs between groups.

273 All outcomes will be analyzed in intention to treat (ITT) population (defined as  
274 participants randomized). Analysis will be performed using SAS version 9.4 (SAS  
275 Institute Inc) with a two-sided P value of less than .05 considered significant.

### 276 **Patient and public involvement**

277 Patients or the public are not involved in the design, or conduct, or reporting, or  
278 dissemination plans of our research.

### 279 **Ethics and dissemination**

280 The protocol was approved for by Guang'anmen Hospital Institution of Review

1  
2  
3  
4 281 Board (2019-241-KY), and registered on Clinicaltrials.gov (NCT04299932). The  
5  
6 282 revisions of the protocol will be reported on the website. The trial will be conducted  
7  
8 283 according to the Declaration of Helsinki and the International Conference on  
9  
10 284 Harmonization Good Clinical Practice E6 Guidance for Good Clinical Practice.  
11  
12 285 Detailed information of the trial will be informed to the participants and written  
13  
14 286 informed content will be obtained from every participant before randomization.  
15  
16 287 Participants in WL group will receive 24-session EA treatment for compensation.  
17  
18 288 Results of the trial will be expected to be published on a peer-reviewed journal.

## 19 289 **DISCUSSION**

20  
21  
22 290 MUI is a condition frustrating almost a third women globally, while about half of  
23  
24 291 them feel embarrassed to speak it out<sup>3 5</sup>. In clinic, a reduction of at least 50% IEF is  
25  
26 292 regarded as successful treatment.<sup>26</sup> Since the specific and non-specific effects of  
27  
28 293 acupuncture towards stress-predominant MUI are still unclear, we make effort to  
29  
30 294 explore the efficacy of EA under clinical meaningful outcome with SA and WL as  
31  
32 295 controls. The acupoint regimen and administration protocol in this trial are based on  
33  
34 296 the results of previous studies<sup>15 16</sup> and specialist consensus.

35  
36 297 Apart from specific physiological effect, participants' expectation of a positive  
37  
38 298 outcome and belief in acupuncture may have a physiological effect on the brain,  
39  
40 299 adding non-specific clinical response to acupuncture.<sup>27</sup> For this reason, we design  
41  
42 300 participants' expectations towards outcome and beliefs on acupuncture to assess the  
43  
44 301 efficacy.

45  
46 302 Given the fact that a large proportion of participants in China have received  
47  
48 303 acupuncture treatment in their experience, to better blind the participants in SA group,  
49  
50 304 acupuncture needles will be inserted minimally into skin at none-acupoint areas. The  
51  
52 305 minimal insertion also makes participants to be more sensitive to the electrical current  
53  
54 306 and percept the stimulation as soon as possible. The electrical current may further  
55  
56 307 improve the blindness even if it is connected to needles for only about 30 seconds.

57  
58 308 Limitation also exists in that the participants in WL group and acupuncturists  
59  
60

1  
2  
3  
4 309 cannot be blinded, which might induce performance and detection bias into the trial.  
5  
6 310 To decrease influence towards the results, the outcome assessment will be undertaken  
7  
8 311 by an independent research assistant who know nothing about the allocation.  
9  
10  
11  
12  
13  
14  
15  
16  
17  
18  
19  
20  
21  
22  
23  
24  
25  
26  
27  
28  
29  
30  
31  
32  
33  
34  
35  
36  
37  
38  
39  
40  
41  
42  
43  
44  
45  
46  
47  
48  
49  
50  
51  
52  
53  
54  
55  
56  
57  
58  
59  
60

For peer review only



1  
2  
3  
4 312 **Ethical Approval and Consent to participate:** The study has received approval  
5  
6 313 from the Guang'anmen Hospital Institution of Review Board (2019-241-KY). Written  
7  
8 314 informed content will be obtained from every participant.

9  
10 315 **Consent for publication:** Not applicable.

11  
12 316 **Authors' contributions:** Zhishun Liu conceived the study, initiated the design, and  
13  
14 317 revised the manuscript; Yan Liu is responsible for statistical analysis plan and drafted  
15  
16 318 the manuscript; Yuanjie Sun participated the design and drafted the manuscript; Huan  
17  
18 319 Chen participated the design and revised the manuscript; Yan Yan helped to draft the  
19  
20 320 manuscript. All authors have read and approved the final manuscript.

21  
22 321 **Funding statement:** This work was supported by “The 13th Five-year” National  
23  
24 322 Science and Technology Pillar Program (grant number) by the Ministry of Science  
25  
26 323 and Technology of the People's Republic of China grant number 2017YFC1703602.  
27  
28 324 They have no role in study design and will have no role in collection, management,  
29  
30 325 analysis, and interpretation of data; writing of the report; and the decision to submit  
31  
32 326 the report for publication.

33  
34 327 **Competing interests:** The author declare that they have no competing interests.

35  
36 328 **Acknowledgements:** Appreciation to every participant in the trial and every  
37  
38 329 personnel in recruitment centers for their contributions.  
39  
40  
41  
42  
43  
44  
45  
46  
47  
48  
49  
50  
51  
52  
53  
54  
55  
56  
57  
58  
59  
60

331 **Reference:**

- 332 1. Haylen BT, de Ridder D, Freeman RM, et al. An International Urogynecological  
333 Association (IUGA)/International Continence Society (ICS) joint report on the  
334 terminology for female pelvic floor dysfunction. *Neurourol Urodyn* 2010;29(1):4-20.
- 335 2. Minassian VA, Devore E, Hagan K, et al. Severity of urinary incontinence and  
336 effect on quality of life in women by incontinence type. *Obstet Gynecol*  
337 2013;121(5):1083-90.
- 338 3. Dooley Y, Lowenstein L, Kenton K, et al. Mixed incontinence is more bothersome  
339 than pure incontinence subtypes. *Int Urogynecol J Pelvic Floor Dysfunct*  
340 2008;19(10):1359-62.
- 341 4. Zhu L, Li L, Lang J, et al. Epidemiology of mixed urinary incontinence in China.  
342 *Int J Gynaecol Obstet* 2010;109(1):55-8.
- 343 5. Thom DH, van den Eeden SK, Ragins AI, et al. Differences in Prevalence of  
344 Urinary Incontinence by Race/Ethnicity. *Journal of Urology* 2006;175(1):259-64.
- 345 6. Myers DL. Female mixed urinary incontinence: a clinical review. *JAMA*  
346 2014;311(19):2007-14.
- 347 7. Frick AC, Huang AJ, Van den Eeden SK, et al. Mixed urinary incontinence: greater  
348 impact on quality of life. *J Urol* 2009;182(2):596-600.
- 349 8. Burkhard FC, Bosch JLHR, Cruz F, et al. EAU guidelines on urinary incontinence  
350 in adults. <https://uroweb.org/guideline/urinary-incontinence>. Accessed November 4,  
351 2017.
- 352 9. Dumoulin C, Cacciari LP, Hay-Smith EJC. Pelvic floor muscle training versus no  
353 treatment, or inactive control treatments, for urinary incontinence in women.  
354 *Cochrane Database Syst Rev* 2018;10:CD005654.
- 355 10. Labrie J, Berghmans BL, Fischer K, et al. Surgery versus physiotherapy for stress  
356 urinary incontinence. *New Engl J Med* 2013;369(12):1124-33.
- 357 11. Bo K, Kvarstein B, Nygaard I. Lower urinary tract symptoms and pelvic floor  
358 muscle exercise adherence after 15 years. *Obstet Gynecol* 2005;105(5 Pt 1):999-1005.
- 359 12. Aoki Y, Brown HW, Brubaker L, et al. Urinary incontinence in women. *Nat Rev*  
360 *Dis Primers* 2017;3:17042.
- 361 13. Lee JK, Dwyer PL, Rosamilia A, et al. Persistence of urgency and urge urinary  
362 incontinence in women with mixed urinary symptoms after midurethral slings: a  
363 multivariate analysis. *BJOG* 2011;118(7):798-805.
- 364 14. Richter HE, Litman HJ, Lukacz ES, et al. Demographic and clinical predictors of  
365 treatment failure one year after midurethral sling surgery. *Obstet Gynecol*  
366 2011;117(4):913-21.
- 367 15. Liu Z, Liu Y, Xu H, et al. Effect of Electroacupuncture on Urinary Leakage  
368 Among Women With Stress Urinary Incontinence: A Randomized Clinical Trial.  
369 *JAMA* 2017;317(24):2493-501.
- 370 16. Liu B, Liu Y, Qin Z, et al. Electroacupuncture Versus Pelvic Floor Muscle  
371 Training Plus Solifenacin for Women With Mixed Urinary Incontinence: A

- 1  
2  
3 372 Randomized Noninferiority Trial. *Mayo Clin Proc* 2019;94(1):54-65.
- 4 373 17. Wang W, Liu Y, Su T, et al. Comparing the effect of electroacupuncture treatment  
5 374 on obese and non-obese women with stress urinary incontinence or stress-  
6 375 predominant mixed urinary incontinence: A secondary analysis of two randomised  
7 376 controlled trials. *Int J Clin Pract* 2019:e13435.
- 8 377 18. Herzog AR, Diokno AC, Brown MB, et al. Two-year incidence, remission, and  
9 378 change patterns of urinary incontinence in noninstitutionalized older adults. *J*  
10 379 *Gerontol* 1990;45(2):M67-74.
- 11 380 19. Krhut J, Zachoval R, Smith PP, et al. Pad weight testing in the evaluation of  
12 381 urinary incontinence. *Neurourol Urodyn* 2014;33(5):507-10.
- 13 382 20. WHO Regional Office for the Western Pacific. WHO Standard Acupuncture Point  
14 383 Locations in the Western Pacific Region. Geneva: World Health Organization Pr;  
15 384 2008.
- 16 385 21. Bright E, Cotterill N, Drake M, et al. Developing and validating the International  
17 386 Consultation on Incontinence Questionnaire bladder diary. *Eur Urol* 2014;66(2):294-  
18 387 300.
- 19 388 22. Avery K, Donovan J, Peters TJ, et al. ICIQ: a brief and robust measure for  
20 389 evaluating the symptoms and impact of urinary incontinence. *Neurourol Urodyn*  
21 390 2004;23(4):322-30.
- 22 391 23. Huang L, Zhang SW, Wu SL, et al. The Chinese version of ICIQ: a useful tool in  
23 392 clinical practice and research on urinary incontinence. *Neurourol Urodyn*  
24 393 2008;27(6):522-4.
- 25 394 24. Abrams P, Blaivas JG, Stanton SL, et al. Standardisation of terminology of lower  
26 395 urinary tract function. *Neurourology and Urodynamics* 1988;7(5):403-27.
- 27 396 25. Viktrup L, Hayes RP, Wang P, et al. Construct validation of patient global  
28 397 impression of severity (PGI-S) and improvement (PGI-I) questionnaires in the  
29 398 treatment of men with lower urinary tract symptoms secondary to benign prostatic  
30 399 hyperplasia. *BMC Urol* 2012;12:30.
- 31 400 26. Yalcin I, Peng G, Viktrup L, et al. Reductions in stress urinary incontinence  
32 401 episodes: what is clinically important for women? *Neurourol Urodyn* 2010;29(3):344-  
33 402 7.
- 34 403 27. Pariente J, White P, Frackowiak RS, et al. Expectancy and belief modulate the  
35 404 neuronal substrates of pain treated by acupuncture. *Neuroimage* 2005;25(4):1161-7.
- 36  
37  
38  
39  
40  
41  
42  
43  
44  
45  
46  
47  
48  
49  
50  
51  
52  
53  
54  
55  
56  
57  
58  
59  
60

1  
2  
3  
4 **Figure legends**

5 Figure 1. Flow chart

6  
7 Figure 2. Study schedule

8  
9 \* Only for participants in electroacupuncture and sham electroacupuncture groups

10  
11  
12  
13  
14  
15  
16  
17  
18  
19  
20  
21  
22  
23  
24  
25  
26  
27  
28  
29  
30  
31  
32  
33  
34  
35  
36  
37  
38  
39  
40  
41  
42  
43  
44  
45  
46  
47  
48  
49  
50  
51  
52  
53  
54  
55  
56  
57  
58  
59  
60

For peer review only

1  
2  
3  
4  
5  
6  
7  
8  
9  
10  
11  
12  
13  
14  
15  
16  
17  
18  
19  
20  
21  
22  
23  
24  
25  
26  
27  
28  
29  
30  
31  
32  
33  
34  
35  
36  
37  
38  
39  
40  
41  
42  
43  
44  
45  
46  
47  
48  
49  
50  
51  
52  
53  
54  
55  
56  
57  
58  
59  
60

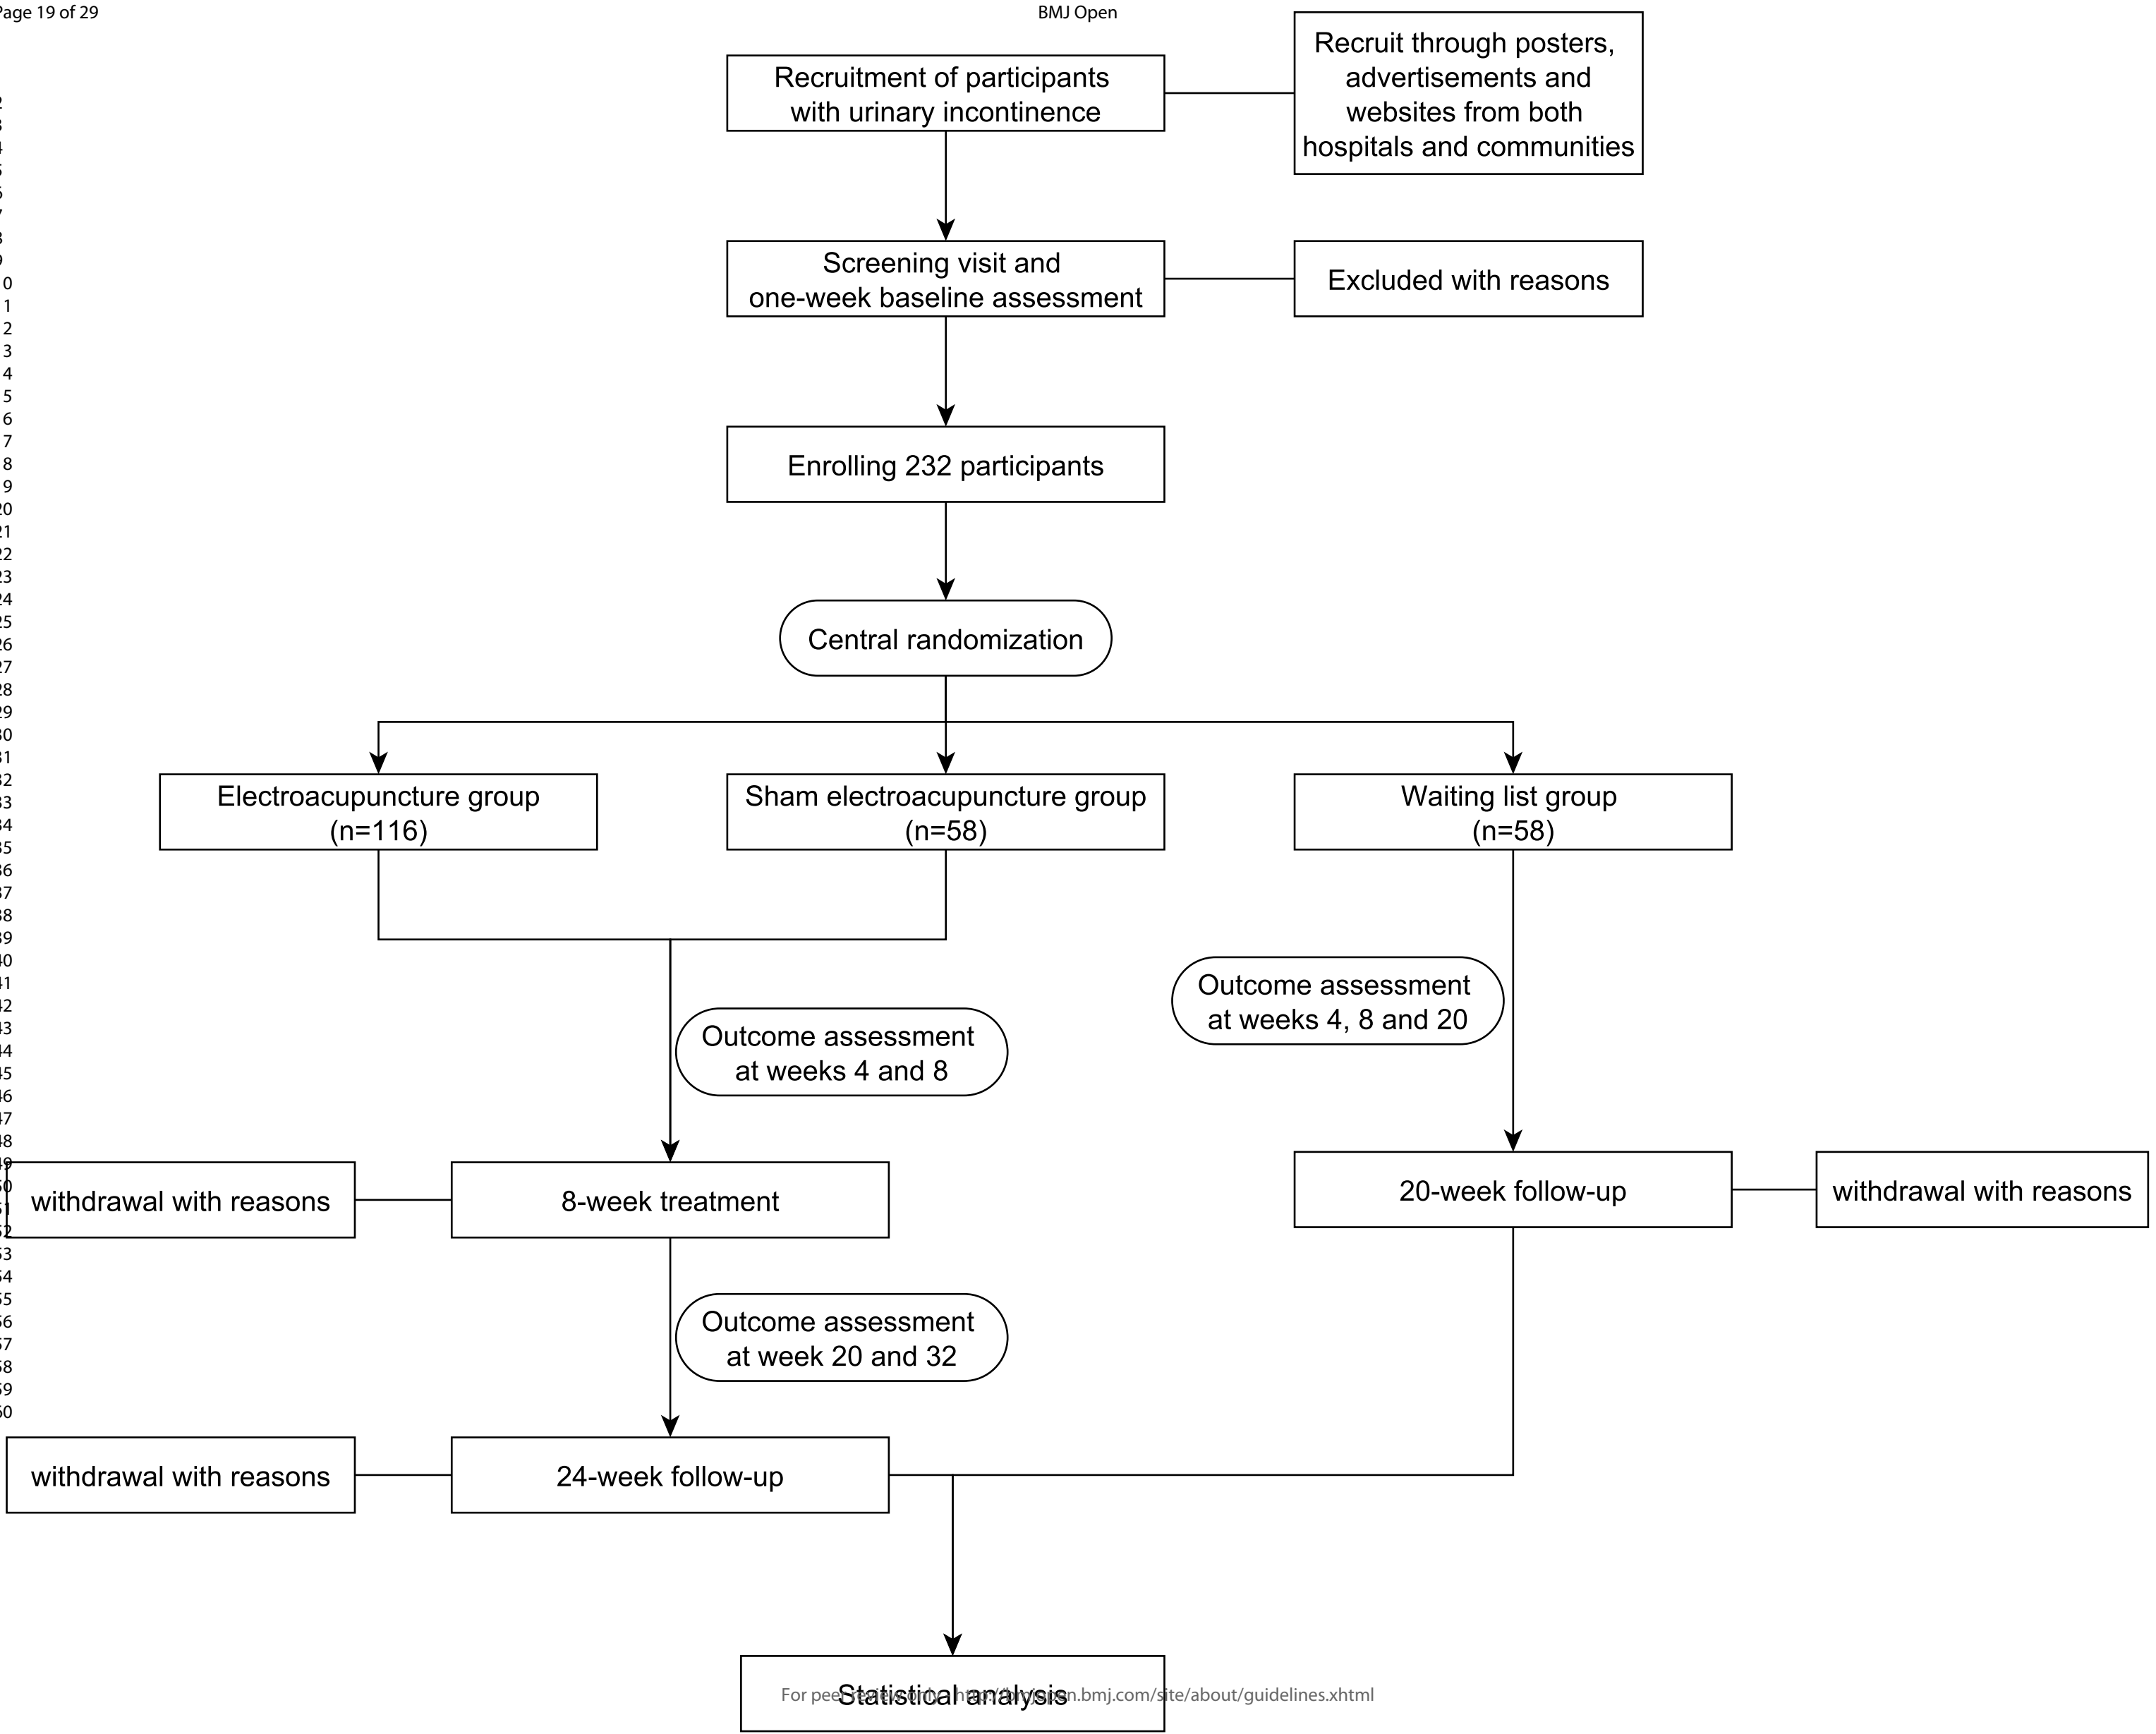

| TIMEPOINT     |                                                                     | Week -1 | Week 0 | Week 4 | Week 8 | Week 20 | Week 32* |
|---------------|---------------------------------------------------------------------|---------|--------|--------|--------|---------|----------|
| ENROLMENT     | Eligibility screen                                                  | ×       |        |        |        |         |          |
|               | Informed consent                                                    | ×       |        |        |        |         |          |
|               | Allocation                                                          |         | ×      |        |        |         |          |
| INTERVENTIONS | Electroacupuncture                                                  |         |        | ×      | ×      |         |          |
|               | Sham electroacupuncture                                             |         |        | ×      | ×      |         |          |
|               | Waiting list                                                        |         |        | ×      | ×      | ×       |          |
| ASSESSMENTS   | Demography information                                              | ×       |        |        |        |         |          |
|               | 3-day voiding diary                                                 | ×       |        | ×      | ×      | ×       | ×        |
|               | 1-hour pad test                                                     | ×       |        |        | ×      |         |          |
|               | International Consultation on Incontinence Questionnaire short form | ×       |        | ×      | ×      | ×       | ×        |
|               | Patient global impression of improvement                            |         |        | ×      |        | ×       |          |
|               | Adverse events                                                      | ×       | ×      | ×      | ×      | ×       | ×        |
|               | Blindness assessment*                                               |         |        |        | ×      |         |          |
|               | Expectation assessment*                                             | ×       |        |        |        |         |          |
|               | Belief assessment*                                                  | ×       |        | ×      |        |         |          |

### Testimonials of sponsor

This study was supported by “The 13th Five-year” National Science and Technology Pillar Program (grant number 2017YFC1703602) by the Ministry of Science and Technology of the People’s Republic of China.

We provide the cover page and signature and seal pages of project assignment paper as testimonials.

Attachment 1: Cover page of project assignment paper

Attachment 2: Signature and seal pages of project assignment paper

1  
2  
3  
4  
5 课题编号：2017YFC1703602  
6  
7  
8  
9  
10

密 级：公开

11  
12 国家重点研发计划  
13 课题任务书  
14  
15  
16  
17  
18  
19  
2021  
22 课题名称： 电针治疗神经源性尿潴留、膀胱过度活动症的疗效评  
23 价  
24  
25 所属项目： 针灸优势病种疗效评价国际合作研究  
26  
27 所属专项： 中医药现代化研究  
28  
29 项目牵头承担单位： 中国中医科学院中医临床基础医学研究所  
30  
31 课题承担单位： 中国中医科学院广安门医院  
32  
33 课题负责人： 刘志顺  
34  
35 执行期限： 2018年03月至2021年12月  
36  
37  
38  
39  
40  
41  
42  
43  
44  
45  
46  
47  
48  
49  
50  
51  
52  
53  
54  
55  
56  
57  
58  
59  
60

中华人民共和国科学技术部制

2018年01月26日

0003YF 2017YFC1703602 2018-01-26 10:47:49

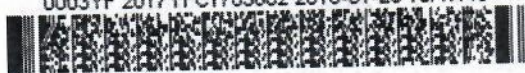



## 任务书签署

甲乙双方根据《国务院关于改进加强中央财政科研项目和资金管理的若干意见》（国发[2014]11号）、《国务院印发关于深化中央财政科技计划（专项、基金）管理改革方案的通知》（国发[2014]64号）、《科技部 财政部关于印发〈国家重点研发计划管理暂行办法〉的通知》（国科发资[2017]152号）、《财政部 科技部关于印发〈国家重点研发计划资金管理办法〉的通知》（财科教[2016]113号）、《科技部财政部关于印发〈中央财政科技计划（专项、基金等）监督工作暂行规定〉的通知》（国科发政[2015]471号）等有关文件规定，以及有关法律、政策和管理要求，依据项目立项通知，签署本任务书。

项目牵头承担单位（甲方）：

法定代表人签字（签章）：

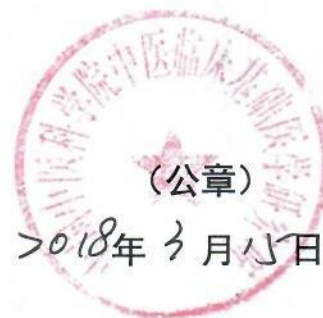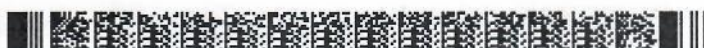

项目负责人签字 (签章): 何丽云

2018年3月15日

课题承担单位 (乙方):

法定代表人签字 (签章):

王阶

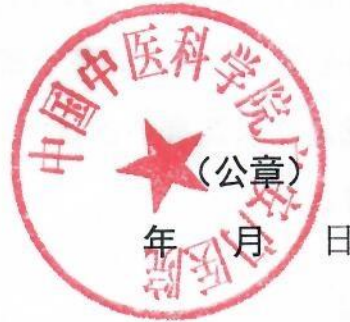

课题负责人签字 (签章):

刘建

2018年3月15日

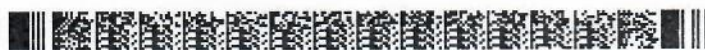

1  
2  
3  
4  
5  
6  
7  
8  
9  
10  
11  
12  
13  
14  
15  
16  
17  
18  
19  
20  
21  
22  
23  
24  
25  
26  
27  
28  
29  
30  
31  
32  
33  
34  
35  
36  
37  
38  
39  
40  
41  
42  
43  
44  
45  
46  
47  
48  
49  
50  
51  
52  
53  
54  
55  
56  
57  
58  
59  
60

Table 1

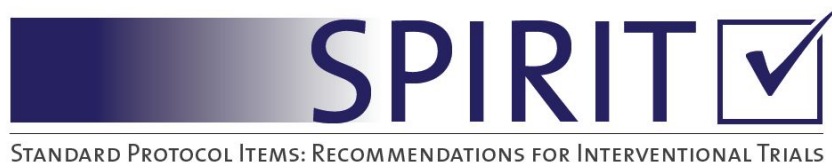

SPIRIT 2013 Checklist: Recommended items to address in a clinical trial protocol and related documents\*

| Section/item                      | Item No | Description                                                                                                                                                                                                                                                                              | Addressed on page number |
|-----------------------------------|---------|------------------------------------------------------------------------------------------------------------------------------------------------------------------------------------------------------------------------------------------------------------------------------------------|--------------------------|
| <b>Administrative information</b> |         |                                                                                                                                                                                                                                                                                          |                          |
| Title                             | 1       | Descriptive title identifying the study design, population, interventions, and, if applicable, trial acronym                                                                                                                                                                             | 1                        |
| Trial registration                | 2a      | Trial identifier and registry name. If not yet registered, name of intended registry                                                                                                                                                                                                     | 2                        |
|                                   | 2b      | All items from the World Health Organization Trial Registration Data Set                                                                                                                                                                                                                 | NA                       |
| Protocol version                  | 3       | Date and version identifier                                                                                                                                                                                                                                                              | 2                        |
| Funding                           | 4       | Sources and types of financial, material, and other support                                                                                                                                                                                                                              | 14                       |
| Roles and responsibilities        | 5a      | Names, affiliations, and roles of protocol contributors                                                                                                                                                                                                                                  | 1,14                     |
|                                   | 5b      | Name and contact information for the trial sponsor                                                                                                                                                                                                                                       | 14                       |
|                                   | 5c      | Role of study sponsor and funders, if any, in study design; collection, management, analysis, and interpretation of data; writing of the report; and the decision to submit the report for publication, including whether they will have ultimate authority over any of these activities | 14                       |
|                                   | 5d      | Composition, roles, and responsibilities of the coordinating centre, steering committee, endpoint adjudication committee, data management team, and other individuals or groups overseeing the trial, if applicable (see Item 21a for data monitoring committee)                         | NA                       |

## Introduction

|                          |    |                                                                                                                                                                                                           |     |
|--------------------------|----|-----------------------------------------------------------------------------------------------------------------------------------------------------------------------------------------------------------|-----|
| Background and rationale | 6a | Description of research question and justification for undertaking the trial, including summary of relevant studies (published and unpublished) examining benefits and harms for each intervention        | 5   |
|                          | 6b | Explanation for choice of comparators                                                                                                                                                                     | 4-5 |
| Objectives               | 7  | Specific objectives or hypotheses                                                                                                                                                                         | 5   |
| Trial design             | 8  | Description of trial design including type of trial (eg, parallel group, crossover, factorial, single group), allocation ratio, and framework (eg, superiority, equivalence, noninferiority, exploratory) | 5   |

## Methods: Participants, interventions, and outcomes

|                      |     |                                                                                                                                                                                                                                                                                                                                                                                |      |
|----------------------|-----|--------------------------------------------------------------------------------------------------------------------------------------------------------------------------------------------------------------------------------------------------------------------------------------------------------------------------------------------------------------------------------|------|
| Study setting        | 9   | Description of study settings (eg, community clinic, academic hospital) and list of countries where data will be collected. Reference to where list of study sites can be obtained                                                                                                                                                                                             | 5    |
| Eligibility criteria | 10  | Inclusion and exclusion criteria for participants. If applicable, eligibility criteria for study centres and individuals who will perform the interventions (eg, surgeons, psychotherapists)                                                                                                                                                                                   | 5-7  |
| Interventions        | 11a | Interventions for each group with sufficient detail to allow replication, including how and when they will be administered                                                                                                                                                                                                                                                     | 7-8  |
|                      | 11b | Criteria for discontinuing or modifying allocated interventions for a given trial participant (eg, drug dose change in response to harms, participant request, or improving/worsening disease)                                                                                                                                                                                 | 8    |
|                      | 11c | Strategies to improve adherence to intervention protocols, and any procedures for monitoring adherence (eg, drug tablet return, laboratory tests)                                                                                                                                                                                                                              | 10   |
|                      | 11d | Relevant concomitant care and interventions that are permitted or prohibited during the trial                                                                                                                                                                                                                                                                                  | 8    |
| Outcomes             | 12  | Primary, secondary, and other outcomes, including the specific measurement variable (eg, systolic blood pressure), analysis metric (eg, change from baseline, final value, time to event), method of aggregation (eg, median, proportion), and time point for each outcome. Explanation of the clinical relevance of chosen efficacy and harm outcomes is strongly recommended | 8-10 |

|                      |    |                                                                                                                                                                                       |          |
|----------------------|----|---------------------------------------------------------------------------------------------------------------------------------------------------------------------------------------|----------|
| Participant timeline | 13 | Time schedule of enrolment, interventions (including any run-ins and washouts), assessments, and visits for participants. A schematic diagram is highly recommended (see Figure)      | Figure 2 |
| Sample size          | 14 | Estimated number of participants needed to achieve study objectives and how it was determined, including clinical and statistical assumptions supporting any sample size calculations | 11       |
| Recruitment          | 15 | Strategies for achieving adequate participant enrolment to reach target sample size                                                                                                   | 5        |

### Methods: Assignment of interventions (for controlled trials)

#### Allocation:

|                                  |     |                                                                                                                                                                                                                                                                                                                                                          |   |
|----------------------------------|-----|----------------------------------------------------------------------------------------------------------------------------------------------------------------------------------------------------------------------------------------------------------------------------------------------------------------------------------------------------------|---|
| Sequence generation              | 16a | Method of generating the allocation sequence (eg, computer-generated random numbers), and list of any factors for stratification. To reduce predictability of a random sequence, details of any planned restriction (eg, blocking) should be provided in a separate document that is unavailable to those who enrol participants or assign interventions | 7 |
| Allocation concealment mechanism | 16b | Mechanism of implementing the allocation sequence (eg, central telephone; sequentially numbered, opaque, sealed envelopes), describing any steps to conceal the sequence until interventions are assigned                                                                                                                                                | 7 |
| Implementation                   | 16c | Who will generate the allocation sequence, who will enrol participants, and who will assign participants to interventions                                                                                                                                                                                                                                | 7 |
| Blinding (masking)               | 17a | Who will be blinded after assignment to interventions (eg, trial participants, care providers, outcome assessors, data analysts), and how                                                                                                                                                                                                                | 7 |
|                                  | 17b | If blinded, circumstances under which unblinding is permissible, and procedure for revealing a participant's allocated intervention during the trial                                                                                                                                                                                                     | 8 |

### Methods: Data collection, management, and analysis

|                         |     |                                                                                                                                                                                                                                                                                                                                                                                                              |      |
|-------------------------|-----|--------------------------------------------------------------------------------------------------------------------------------------------------------------------------------------------------------------------------------------------------------------------------------------------------------------------------------------------------------------------------------------------------------------|------|
| Data collection methods | 18a | Plans for assessment and collection of outcome, baseline, and other trial data, including any related processes to promote data quality (eg, duplicate measurements, training of assessors) and a description of study instruments (eg, questionnaires, laboratory tests) along with their reliability and validity, if known. Reference to where data collection forms can be found, if not in the protocol | 9-10 |
|-------------------------|-----|--------------------------------------------------------------------------------------------------------------------------------------------------------------------------------------------------------------------------------------------------------------------------------------------------------------------------------------------------------------------------------------------------------------|------|

|    |                                 |     |                                                                                 |
|----|---------------------------------|-----|---------------------------------------------------------------------------------|
| 1  |                                 |     |                                                                                 |
| 2  |                                 |     |                                                                                 |
| 3  |                                 |     |                                                                                 |
| 4  |                                 |     |                                                                                 |
| 5  |                                 | 18b | Plans to promote participant retention and complete follow-up, including list 8 |
| 6  |                                 |     | of any outcome data to be collected for participants who discontinue or         |
| 7  |                                 |     | deviate from intervention protocols                                             |
| 8  |                                 |     |                                                                                 |
| 9  |                                 |     |                                                                                 |
| 10 | Data                            | 19  | Plans for data entry, coding, security, and storage, including any related 10   |
| 11 | management                      |     | processes to promote data quality (eg, double data entry; range checks for      |
| 12 |                                 |     | data values). Reference to where details of data management procedures          |
| 13 |                                 |     | can be found, if not in the protocol                                            |
| 14 |                                 |     |                                                                                 |
| 15 | Statistical                     | 20a | Statistical methods for analysing primary and secondary outcomes. 11            |
| 16 | methods                         |     | Reference to where other details of the statistical analysis plan can be        |
| 17 |                                 |     | found, if not in the protocol                                                   |
| 18 |                                 |     |                                                                                 |
| 19 |                                 |     |                                                                                 |
| 20 |                                 | 20b | Methods for any additional analyses (eg, subgroup and adjusted analyses) NA     |
| 21 |                                 |     |                                                                                 |
| 22 |                                 | 20c | Definition of analysis population relating to protocol non-adherence (eg, as    |
| 23 |                                 |     | randomised analysis), and any statistical methods to handle missing data 11     |
| 24 |                                 |     | (eg, multiple imputation)                                                       |
| 25 |                                 |     |                                                                                 |
| 26 |                                 |     |                                                                                 |
| 27 | <b>Methods: Monitoring</b>      |     |                                                                                 |
| 28 |                                 |     |                                                                                 |
| 29 | Data                            | 21a | Composition of data monitoring committee (DMC); summary of its role and NA      |
| 30 | monitoring                      |     | reporting structure; statement of whether it is independent from the sponsor    |
| 31 |                                 |     | and competing interests; and reference to where further details about its       |
| 32 |                                 |     | charter can be found, if not in the protocol. Alternatively, an explanation of  |
| 33 |                                 |     | why a DMC is not needed                                                         |
| 34 |                                 |     |                                                                                 |
| 35 |                                 |     |                                                                                 |
| 36 |                                 | 21b | Description of any interim analyses and stopping guidelines, including who NA   |
| 37 |                                 |     | will have access to these interim results and make the final decision to        |
| 38 |                                 |     | terminate the trial                                                             |
| 39 |                                 |     |                                                                                 |
| 40 | Harms                           | 22  | Plans for collecting, assessing, reporting, and managing solicited and 10       |
| 41 |                                 |     | spontaneously reported adverse events and other unintended effects of           |
| 42 |                                 |     | trial interventions or trial conduct                                            |
| 43 |                                 |     |                                                                                 |
| 44 |                                 |     |                                                                                 |
| 45 | Auditing                        | 23  | Frequency and procedures for auditing trial conduct, if any, and whether NA     |
| 46 |                                 |     | the process will be independent from investigators and the sponsor              |
| 47 |                                 |     |                                                                                 |
| 48 |                                 |     |                                                                                 |
| 49 | <b>Ethics and dissemination</b> |     |                                                                                 |
| 50 |                                 |     |                                                                                 |
| 51 | Research                        | 24  | Plans for seeking research ethics committee/institutional review board 11-12,14 |
| 52 | ethics                          |     | (REC/IRB) approval                                                              |
| 53 | approval                        |     |                                                                                 |
| 54 |                                 |     |                                                                                 |
| 55 |                                 |     |                                                                                 |
| 56 |                                 |     |                                                                                 |
| 57 |                                 |     |                                                                                 |
| 58 |                                 |     |                                                                                 |
| 59 |                                 |     |                                                                                 |
| 60 |                                 |     |                                                                                 |

|    |                   |     |                                                                                   |    |
|----|-------------------|-----|-----------------------------------------------------------------------------------|----|
| 1  |                   |     |                                                                                   |    |
| 2  |                   |     |                                                                                   |    |
| 3  |                   |     |                                                                                   |    |
| 4  |                   |     |                                                                                   |    |
| 5  | Protocol          | 25  | Plans for communicating important protocol modifications (eg, changes to          | 12 |
| 6  | amendments        |     | eligibility criteria, outcomes, analyses) to relevant parties (eg, investigators, |    |
| 7  |                   |     | REC/IRBs, trial participants, trial registries, journals, regulators)             |    |
| 8  |                   |     |                                                                                   |    |
| 9  | Consent or        | 26a | Who will obtain informed consent or assent from potential trial participants      | 14 |
| 10 | assent            |     | or authorised surrogates, and how (see Item 32)                                   |    |
| 11 |                   |     |                                                                                   |    |
| 12 |                   | 26b | Additional consent provisions for collection and use of participant data and      | NA |
| 13 |                   |     | biological specimens in ancillary studies, if applicable                          |    |
| 14 |                   |     |                                                                                   |    |
| 15 |                   |     |                                                                                   |    |
| 16 | Confidentiality   | 27  | How personal information about potential and enrolled participants will be        | 10 |
| 17 |                   |     | collected, shared, and maintained in order to protect confidentiality before,     |    |
| 18 |                   |     | during, and after the trial                                                       |    |
| 19 |                   |     |                                                                                   |    |
| 20 | Declaration of    | 28  | Financial and other competing interests for principal investigators for the       | 14 |
| 21 | interests         |     | overall trial and each study site                                                 |    |
| 22 |                   |     |                                                                                   |    |
| 23 |                   |     |                                                                                   |    |
| 24 | Access to         | 29  | Statement of who will have access to the final trial dataset, and disclosure      | 10 |
| 25 | data              |     | of contractual agreements that limit such access for investigators                |    |
| 26 |                   |     |                                                                                   |    |
| 27 | Ancillary and     | 30  | Provisions, if any, for ancillary and post-trial care, and for compensation to    | NA |
| 28 | post-trial care   |     | those who suffer harm from trial participation                                    |    |
| 29 |                   |     |                                                                                   |    |
| 30 | Dissemination     | 31a | Plans for investigators and sponsor to communicate trial results to               | 10 |
| 31 | policy            |     | participants, healthcare professionals, the public, and other relevant groups     |    |
| 32 |                   |     | (eg, via publication, reporting in results databases, or other data sharing       |    |
| 33 |                   |     | arrangements), including any publication restrictions                             |    |
| 34 |                   |     |                                                                                   |    |
| 35 |                   |     |                                                                                   |    |
| 36 |                   | 31b | Authorship eligibility guidelines and any intended use of professional            | NA |
| 37 |                   |     | writers                                                                           |    |
| 38 |                   |     |                                                                                   |    |
| 39 |                   | 31c | Plans, if any, for granting public access to the full protocol, participant-level | 10 |
| 40 |                   |     | dataset, and statistical code                                                     |    |
| 41 |                   |     |                                                                                   |    |
| 42 |                   |     |                                                                                   |    |
| 43 | <b>Appendices</b> |     |                                                                                   |    |
| 44 |                   |     |                                                                                   |    |
| 45 | Informed          | 32  | Model consent form and other related documentation given to participants          | 8  |
| 46 | consent           |     | and authorised surrogates                                                         |    |
| 47 | materials         |     |                                                                                   |    |
| 48 |                   |     |                                                                                   |    |
| 49 | Biological        | 33  | Plans for collection, laboratory evaluation, and storage of biological            | NA |
| 50 | specimens         |     | specimens for genetic or molecular analysis in the current trial and for          |    |
| 51 |                   |     | future use in ancillary studies, if applicable                                    |    |
| 52 |                   |     |                                                                                   |    |
| 53 |                   |     |                                                                                   |    |
| 54 |                   |     |                                                                                   |    |
| 55 |                   |     |                                                                                   |    |
| 56 |                   |     |                                                                                   |    |
| 57 |                   |     |                                                                                   |    |
| 58 |                   |     |                                                                                   |    |
| 59 |                   |     |                                                                                   |    |
| 60 |                   |     |                                                                                   |    |

1  
2  
3  
4  
5 \*It is strongly recommended that this checklist be read in conjunction with the SPIRIT 2013 Explanation &  
6 Elaboration for important clarification on the items. Amendments to the protocol should be tracked and dated.  
7 The SPIRIT checklist is copyrighted by the SPIRIT Group under the Creative Commons "[Attribution-  
8 NonCommercial-NoDerivs 3.0 Unported](#)" license.  
9  
10  
11  
12  
13  
14  
15  
16  
17  
18  
19  
20  
21  
22  
23  
24  
25  
26  
27  
28  
29  
30  
31  
32  
33  
34  
35  
36  
37  
38  
39  
40  
41  
42  
43  
44  
45  
46  
47  
48  
49  
50  
51  
52  
53  
54  
55  
56  
57  
58  
59  
60



# BMJ Open

## Electroacupuncture for stress-predominant mixed urinary incontinence: a protocol for a three-armed randomized controlled trial

|                                 |                                                                                                                                                                                                                                                                                                                                                                                                                                                                                                                                                                                                         |
|---------------------------------|---------------------------------------------------------------------------------------------------------------------------------------------------------------------------------------------------------------------------------------------------------------------------------------------------------------------------------------------------------------------------------------------------------------------------------------------------------------------------------------------------------------------------------------------------------------------------------------------------------|
| Journal:                        | <i>BMJ Open</i>                                                                                                                                                                                                                                                                                                                                                                                                                                                                                                                                                                                         |
| Manuscript ID                   | bmjopen-2020-038452.R1                                                                                                                                                                                                                                                                                                                                                                                                                                                                                                                                                                                  |
| Article Type:                   | Protocol                                                                                                                                                                                                                                                                                                                                                                                                                                                                                                                                                                                                |
| Date Submitted by the Author:   | 30-Sep-2020                                                                                                                                                                                                                                                                                                                                                                                                                                                                                                                                                                                             |
| Complete List of Authors:       | Sun, Yuanjie; China Academy of Traditional Chinese Medicine Guanganmen Hospital, Department of Acupuncture<br>Liu, Yan; Beijing University of Chinese Medicine Affiliated Dongzhimen Hospital, Key Laboratory of Chinese Internal Medicine of Ministry of Education<br>Chen, Huan; China Academy of Traditional Chinese Medicine Guanganmen Hospital, Department of Acupuncture<br>Yan, Yan; China Academy of Traditional Chinese Medicine Guanganmen Hospital, Department of Acupuncture<br>Liu, zhishun; China Academy of Traditional Chinese Medicine Guanganmen Hospital, Department of Acupuncture |
| <b>Primary Subject Heading</b>: | Complementary medicine                                                                                                                                                                                                                                                                                                                                                                                                                                                                                                                                                                                  |
| Secondary Subject Heading:      | Urology, Complementary medicine                                                                                                                                                                                                                                                                                                                                                                                                                                                                                                                                                                         |
| Keywords:                       | Urinary incontinences < UROLOGY, Bladder disorders < UROLOGY, COMPLEMENTARY MEDICINE                                                                                                                                                                                                                                                                                                                                                                                                                                                                                                                    |
|                                 |                                                                                                                                                                                                                                                                                                                                                                                                                                                                                                                                                                                                         |

SCHOLARONE™  
Manuscripts



I, the Submitting Author has the right to grant and does grant on behalf of all authors of the Work (as defined in the below author licence), an exclusive licence and/or a non-exclusive licence for contributions from authors who are: i) UK Crown employees; ii) where BMJ has agreed a CC-BY licence shall apply, and/or iii) in accordance with the terms applicable for US Federal Government officers or employees acting as part of their official duties; on a worldwide, perpetual, irrevocable, royalty-free basis to BMJ Publishing Group Ltd ("BMJ") its licensees and where the relevant Journal is co-owned by BMJ to the co-owners of the Journal, to publish the Work in this journal and any other BMJ products and to exploit all rights, as set out in our [licence](#).

The Submitting Author accepts and understands that any supply made under these terms is made by BMJ to the Submitting Author unless you are acting as an employee on behalf of your employer or a postgraduate student of an affiliated institution which is paying any applicable article publishing charge ("APC") for Open Access articles. Where the Submitting Author wishes to make the Work available on an Open Access basis (and intends to pay the relevant APC), the terms of reuse of such Open Access shall be governed by a Creative Commons licence – details of these licences and which [Creative Commons](#) licence will apply to this Work are set out in our licence referred to above.

Other than as permitted in any relevant BMJ Author's Self Archiving Policies, I confirm this Work has not been accepted for publication elsewhere, is not being considered for publication elsewhere and does not duplicate material already published. I confirm all authors consent to publication of this Work and authorise the granting of this licence.

1  
2  
3  
4 1 Title page

5  
6 2

7  
8 3 Article title:

9  
10 4 **Electroacupuncture for stress-predominant mixed urinary**  
11 **incontinence: a protocol for a three-armed randomized controlled**  
12 **trial**

13  
14  
15  
16 7 Yuanjie Sun, MD<sup>1\*</sup>; Yan Liu, MD<sup>2\*</sup>; Huan Chen, MD, MSc<sup>1</sup>; Yan Yan, BS<sup>1</sup>; Zhishun  
17  
18 8 Liu, MD, PhD<sup>1†</sup>

19  
20 9

21  
22 10 1 Department of Acupuncture, China Academy of Traditional Chinese Medicine  
23  
24 11 Guanganmen Hospital, Beijing, China

25  
26 12 2 Key Laboratory of Chinese Internal Medicine of Ministry of Education, Beijing  
27  
28 13 University of Chinese Medicine Affiliated Dongzhimen Hospital, Beijing, China

29  
30 14

31  
32 15 \*Yuanjie Sun and Yan Liu contributed equally to this work and shared the first author  
33  
34 16 position.

35  
36 17

37  
38 18 †Corresponding author: Department of Acupuncture, China Academy of Traditional  
39  
40 19 Chinese Medicine Guanganmen Hospital, Beijing, China. Tel. +86 10 88002331; Fax:  
41  
42 20 +86 10 88001241; E-mail address: zhishunjournal@163.com (Zhishun Liu).

43  
44 21 **Running title:** acupuncture for stress-predominant mixed urinary incontinence

45  
46 22 **Word count:** abstract 197; main text 3164

1  
2  
3  
4 23 **Abstract**

5 24 **Introduction:** Evidence targeted at stress-predominant mixed urinary incontinence is  
6  
7 still lack at present, and acupuncture might help to relieve the symptoms. We plan to  
8  
9 conduct this multi-center, three-armed, randomized controlled trial to investigate the  
10  
11 efficacy and safety of electroacupuncture on women with stress-predominant mixed  
12  
13 urinary incontinence.  
14

15 29 **Methods and analysis:** The trial will be conducted in 5 hospitals in China. 232  
16  
17 eligible women will be randomly assigned to electroacupuncture, sham  
18  
19 electroacupuncture or waiting list group, at 2:1:1 ratio, to receive 24-session  
20  
21 acupuncture or sham acupuncture treatment over 8 weeks and 24-week follow-up, or  
22  
23 20-week watchful waiting. The primary outcome is the proportion of participants with  
24  
25 at least 50% reduction in mean 24-hour stress incontinence episode frequencies from  
26  
27 baseline to week 8. The outcome will be analyzed in intention to treat population  
28  
29 (defined as participants randomized) with a two-sided *P* value of less than .05  
30  
31 considered significant.  
32  
33

34 38 **Ethics and dissemination:** The protocol was approved by Guang'anmen Hospital  
35  
36 Institution of Review Board (2019-241-KY). Detailed information of the trial will be  
37  
38 informed to the participants and written informed content will be obtained from every  
39  
40 participant before randomization. Results of the trial will be expected to be published  
41  
42 on a peer-reviewed journal.  
43

44 43 **Key words:** Acupuncture; Mixed urinary incontinence; Female; Stress urinary  
45  
46 incontinence  
47

48 45 **Trial registration:** Clinicaltrials.gov identifier: NCT04299932  
49  
50  
51  
52  
53  
54  
55  
56  
57  
58  
59  
60

1  
2  
3  
4 **46 Strengths and limitations of this study**

- 5  
6 47 ➤ The first randomized controlled trial to investigate the efficacy and safety of  
7  
8 48 acupuncture on stress-predominant mixed urinary incontinence.
- 9  
10 49 ➤ Sham control and waiting-list control are designed to eliminate the influence of  
11  
12 50 placebo effects and disease's natural course on the efficacy of acupuncture;
- 13  
14 51 ➤ Minimal electroacupuncture serves as a sham intervention to blind participants in  
15  
16 52 the electroacupuncture and sham electroacupuncture groups.
- 17  
18 53 ➤ One limitation is that acupuncturists and participants in the waiting list group  
19  
20 54 cannot be blinded.  
21  
22  
23  
24  
25  
26  
27  
28  
29  
30  
31  
32  
33  
34  
35  
36  
37  
38  
39  
40  
41  
42  
43  
44  
45  
46  
47  
48  
49  
50  
51  
52  
53  
54  
55  
56  
57  
58  
59  
60

## 55 INTRODUCTION

56 Mixed urinary incontinence (MUI) is a complaint of involuntary loss of urinary  
57 associated with both physical exertion and urgency.<sup>1</sup> Compared with pure urinary  
58 incontinence (UI), MUI presents with more severe symptoms and puts greater burden  
59 on the health of individuals and economy of the society.<sup>2</sup> An estimate of 21%-33%  
60 females in the world<sup>3</sup> and 9.4% females in China<sup>4</sup> are troubled with MUI, while less  
61 than fifty percent of such population report it to doctors and receive treatment<sup>5</sup>.

62 Stress-predominant MUI constitutes mainly of stress component. It features leakage  
63 on increased abdominal pressure, which can be induced by exertion, sneeze, cough,  
64 etc. Despite the existence of leakage with urgency, stress incontinence episode  
65 frequency (IEF) outnumbered 50% of total IEF.<sup>6</sup>

66 Current European Association of Urology (EAU) guideline on incontinence  
67 recommends to initiate treatment targeted at predominant component of MUI.<sup>7</sup>  
68 However, no strong evidence supported that the interventions for stress urinary  
69 incontinence (SUI) is as effective when treating stress-predominant MUI.<sup>6</sup> The effects  
70 of pelvic floor muscle training (PFMT), first-line therapy for pure SUI, decrease  
71 among MUI patients.<sup>8</sup> About half of patients practicing PFMT will seek help from  
72 surgery eventually in long-term follow-up<sup>9</sup>, and surgery might be more useful than  
73 PFMT for moderate to severe symptoms<sup>10</sup>. When surgery is considered for MUI,  
74 other therapies might need to be combined with to control the urgency component.<sup>11</sup>  
75 In addition, the existence of urgency symptoms might be aggravated after surgery<sup>12</sup>,  
76 and even reduce the success rate of stress incontinence operation<sup>13</sup>. Therefore, it is  
77 necessary to seek for interventions specific to stress-predominant MUI.

78 Results of previous studies indicates that acupuncture may help to relieve the  
79 incontinence symptoms.<sup>14 15</sup> It is proven effective in reducing leakage amount of pure  
80 SUI<sup>14</sup> and total IEF of MUI.<sup>15</sup> Further analysis of the two trials suggests EA might  
81 relieve the symptoms of stress-related UI.<sup>16</sup> Since the two trials didn't focus on stress-  
82 predominant MUI specifically, this multi-center, three-armed, randomized controlled

1  
2  
3  
4 83 is designed to evaluate the efficacy and safety of EA in participants with stress-  
5  
6 84 predominant MUI.

### 7 8 85 **Hypotheses**

9  
10 86 Our primary hypothesis is that the effects of EA is superior to sham  
11  
12 87 electroacupuncture (SA) and waiting list (WL) in improving proportion of stress-  
13  
14 88 predominant MUI participants with at least 50% reduction of mean 24-hour stress IEF  
15  
16 89 from baseline to week 8.

## 17 18 90 **METHODS AND ANALYSIS**

### 19 20 91 **Study design**

21  
22 92 This is a three-armed, randomized, SA and WL-controlled trial conducted in five  
23  
24 93 recruitment sites, which are Guang'anmen Hospital, China Academy of Chinese  
25  
26 94 Medical Sciences; Hengyang Hospital Affiliated to Hunan University of Chinese  
27  
28 95 Medicine; Yantai Hospital of Traditional Chinese Medicine; The third affiliated  
29  
30 96 hospital of Beijing university of Chinese Medicine and Jiangxi Provincial Hospital of  
31  
32 97 traditional Chinese Medicine.

33  
34 98 The study durations are 33 weeks for participants in the EA and SA groups with  
35  
36 99 one-week baseline assessment, 8-week treatment and 24-week follow-up; while 21  
37  
38 100 weeks for participants in the WL group, with one-week baseline assessment and 20-  
39  
40 101 week watchful waiting (Figure 1. Flow Chart). The study will start recruitment on  
41  
42 102 October 9, 2020, and is anticipated to finish the treatment and follow-up on  
43  
44 103 September 30, 2023. Participations in the EA and SA groups, outcome assessors, data  
45  
46 104 managers and statisticians will be blind to the group allocation, while acupuncturists  
47  
48 105 and participants in the WL group will not be blind for obvious reasons.

### 49 50 106 **Patient and public involvement**

51  
52 107 Patients or the public are not involved in the design, or conduct, or reporting, or  
53  
54 108 dissemination plans of our research.

### 55 56 109 **Inclusion criteria**

57  
58 110 1) Diagnosis of MUI by the coexistence of SUI and UUI symptoms in accordance  
59  
60

- 1  
2  
3  
4 111 with EAU guideline<sup>7</sup>;
- 5  
6 112 2) Female participants aged between 35 and 75;
- 7  
8 113 3) Stress index > urge index in accordance with Medical, epidemiologic, and social  
9  
10 114 aspects of Aging(MESA) questionnaire<sup>17</sup>;
- 11  
12 115 4) Symptoms of MUI for at least three months, and SUI episodes outnumber 50%  
13  
14 116 total IEF documented in 3-day voiding diary;
- 15  
16 117 5) Less than 12 micturition episodes in average 24 hours documented in 3-day  
17  
18 118 voiding diary;
- 19  
20 119 6) Positive cough stress test;
- 21  
22 120 7) Urine leakage > 1 g in 1-hour pad test<sup>18</sup>;
- 23  
24 121 8) Voluntary participation in the trial and signed written informed content.
- 25  
26 122 Participants meeting all these eight criteria might be able to be recruited in the trial.

27  
28 **123 Exclusion criteria**

- 29  
30 124 1) Urgency-predominant MUI, pure SUI, pure UUI, overflow UI and neurogenic  
31  
32 125 bladder;
- 33  
34 126 2) Uncontrolled symptomatic urinary tract infection;
- 35  
36 127 3) Tumor in urinary system and pelvic organ;
- 37  
38 128 4) Pelvic organ prolapse  $\geq$  degree II ;
- 39  
40 129 5) Residual urine volume  $\geq$  100ml;
- 41  
42 130 6) History of treatments targeted at UI, such as acupuncture, PFMT and medications  
43  
44 131 in the previous one month;
- 45  
46 132 7) History of surgery targeted at UI or in pelvic floor, including hysterectomy;
- 47  
48 133 8) Uncontrolled diabetes or severe high blood pressure;
- 49  
50 134 9) Nervous system diseases that may hamper the function of urinary system, such as  
51  
52 135 Multiple sclerosis, Alzheimer's disease, Parkinson's disease, spinal cord injury,  
53  
54 136 cauda equina nerve injury, or multiple system atrophy;
- 55  
56 137 10) Severe heart, lung, brain, liver, kidney, mental illness, coagulation dysfunction or  
57  
58 138 with obvious cognitive dysfunction
- 59  
60



- 1  
2  
3  
4 139 11) Installed cardiac pacemaker;  
5  
6 140 12) Inconvenient or unable to walk, run, go up and down stairs;  
7  
8 141 13) Allergy to metal, severely fear of acupuncture needles or unbearable to EA;  
9  
10 142 14) Pregnant at present, plan to conceive in future one year, at lactation period or  
11  
12 143 within 12 months after childbirth.

13  
14 144 Participants with either situation mentioned above will not be enrolled in the trial.

### 15 145 **Randomization and allocation concealment**

16  
17  
18 146 The randomization allocation sequence will be produced by a third independent  
19  
20 147 party (Linkermed Technology Co., Ltd. [Beijing, China]). Eligible participants will be  
21  
22 148 randomly assigned into the EA, SA or WL group at 2:1:1 ratio, stratified by  
23  
24 149 recruitment sites and using varied blocks. The randomization number and group  
25  
26 150 allocation will be acquired by acupuncturists in each recruitment site by logging in the  
27  
28 151 Central Randomization System and typing in basic information of eligible  
29  
30 152 participants.

### 31 153 **Interventions**

32  
33  
34 154 The acupoint regimen and administration protocol are both based on the results of  
35  
36 155 previous studies and specialist consensus<sup>14 15</sup>. Participants in the EA group will  
37  
38 156 receive stimulation at bilateral BL33 (Zhongliao), BL35 (Huiyang) and SP6  
39  
40 157 (Sanyinjiao). BL 33 is located in the third posterior sacral foramen; BL35, 0.5 cun ( $\approx$   
41  
42 158 10mm) lateral to the extremity of the coccyx; and SP6 posterior to the medial border  
43  
44 159 of the tibia, 3 cun superior to the prominence of the medial malleolus.<sup>19</sup> Bilateral  
45  
46 160 BL33 will be inserted by acupuncture needles (Huatuo, Suzhou Medical Appliance)  
47  
48 161 of 0.30×75mm size at the angle of 45° , inward and downward, till the depth of 60-  
49  
50 162 70mm. Bilateral BL35 will be inserted by needles of 0.30×75mm size, slightly  
51  
52 163 outward and upward, till the depth of 60-70mm. Bilateral SP6 will be inserted by  
53  
54 164 needles of 0.30×40mm till the depth of 25-30mm. All the needles will be lifted,  
55  
56 165 thrust and twisted evenly for three times, right after insertion, to induce the  
57  
58 166 sensation of *deqi*. Electronic acupuncture apparatus (Yingdi KWD 808 I electro pulse  
59  
60

1  
2  
3  
4 167 acupuncture therapeutic apparatus, Changzhou Yingdi Electronic Medical Device  
5  
6 168 Co., Ltd) will be connected to the three pairs of needles transversally, with continuous  
7  
8 169 wave of 20Hz, electric current of 2mA-6.5mA for BL33 and BL35, and 1mA-3.5mA  
9  
10 170 for SP6. The EA stimulation will last 30mins for each session, 3 sessions a week  
11  
12 171 (ideally every other day) for a succession of 8 weeks.

13  
14 172 Participants in the SA group will receive superficial insertion at bilateral sham  
15  
16 173 BL33 (Zhongliao), sham BL35 (Huiyang) and sham SP6 (Sanyinjiao). Sham BL33 is  
17  
18 174 in the area 1 cun ( $\approx 20$ mm) horizontally outside of BL33; sham BL35, 1 cun ( $\approx$   
19  
20 175 20mm) horizontally outside of BL35; Sham SP6, in the middle of SP6 and tendons.  
21  
22 176 The three pairs of acupoints will be inserted by acupuncture needles of 0.30 $\times$ 40mm  
23  
24 177 size to a depth of 2-3mm till the needles can stand still. No manipulations will be  
25  
26 178 conducted, and the sensation of *deqi* will not be induced. Electronic acupuncture  
27  
28 179 apparatus will be connected to the three pairs of needles transversally, with  
29  
30 180 continuous wave of 20Hz and minimal electric current (ideally at a degree which  
31  
32 181 participant can just percept). In about 30 seconds, the electric current will be turned  
33  
34 182 down, leaving the indicator light and ticking sound on. The treatment sessions are  
35  
36 183 similar to those in the EA group.

37  
38 184 Participants in the EA and SA groups will be blind to the group allocations.  
39  
40 185 Acupuncturists and research assistants will be instructed not to tell the group  
41  
42 186 allocation to participants. Addition, to avoid the occurrence of inadvertent unblinding,  
43  
44 187 the contacts between participants and project staff during treatment will be reduced as  
45  
46 188 much as possible, and the manipulation of acupuncture, connecting to electronic  
47  
48 189 apparatus and withdrawal of needles will be separately undertaken by acupuncturists  
49  
50 190 and another research assistant. Participants will be treated separately with curtain  
51  
52 191 drawing and their companions waiting outside the clinic, if any. Before manipulation,  
53  
54 192 participants will be told that during the treatment they may feel the electrical  
55  
56 193 stimulation fade down gradually, even to the degree that they cannot percept. That is  
57  
58 194 because the body has built up a tolerance to the electrical stimulation during the  
59  
60

1  
2  
3  
4 195 treatment process. Within 5 minutes after either treatment at week 8, participants will  
5  
6 196 be told that they may have received EA treatment with deep insertion, or SA  
7  
8 197 treatment with shallow insertion, and asked to answer the question do you think you  
9  
10 198 have received EA treatment, and choose the answer between the options of Yes and  
11  
12 199 No.

13  
14 200 Participants in the WL group will not receive active treatments. After the trial, they  
15  
16 201 will receive 24-session EA treatment mentioned above as compensation.

17  
18 202 Participants in all the three groups will receive handbook of healthcare education  
19  
20 203 and lifestyle modification advice, concerning exercise, fluid intake, weight loss,  
21  
22 204 smoking and respiratory symptoms, constipation, heavy lifting and urinary tract  
23  
24 205 infection. During the process of the trial, participants are not allowed to take other  
25  
26 206 specialized medication and treatments for UI, such as PFMT or antimuscarinic agents;  
27  
28 207 details should be recorded in CRF if used. Any medications that might influence the  
29  
30 208 function of lower urinary tract function should also be documented in CRF.

## 31 32 209 **Outcomes**

### 33 34 210 Primary outcome

35  
36 211 The primary outcome is the proportion of participants with at least 50% reduction  
37  
38 212 in mean 24-hour stress IEF from baseline to week 8, measured by 3-day voiding  
39  
40 213 diary. At least 50% reduction in IEF is regarded as successful treatment in clinic,<sup>20</sup>  
41  
42 214 and 3-day voiding diary is a reliable and validated tool for UI in both clinic and  
43  
44 215 research, without much burden placed on participants.<sup>21</sup> In 3-day voiding diary, IEF  
45  
46 216 of different types, micturition and nocturia episodes, fluid intake, and pad  
47  
48 217 consumptions will be documented.

### 49 50 218 Secondary outcomes

51  
52 219 Secondary outcomes will be measured by 3-day voiding diary, International  
53  
54 220 Consultation on Incontinence Questionnaire-short form (ICIQ-SF) and Overactive  
55  
56 221 Bladder Questionnaire short form (OAB-q SF) at weeks 4, 8, 20 and 32; 1-hour pad  
57  
58 222 test at week 8; and Patient Global Impression of Improvement (PGI-I) at weeks 8 and  
59  
60

223 20 (Figure 2. Study schedule). The specific secondary outcome measures and time  
224 frame are displayed in Table 1. Secondary outcome measures.

225 ICIQ-SF is a validated tool to assess the frequency, severity and influence on QoL  
226 of UI in the past 4 weeks<sup>22 23</sup>. The total score of the questionnaire ranges from 1 to 21,  
227 with higher score indicating greater severity.

228 OAB-q SF is used to assess the OAB symptom bother and the health-related quality  
229 of life (HRQL) in the past 4 weeks<sup>24 25</sup>. The domains include coping, concern, sleep  
230 and emotional interactions. The scores are transformed to a 0- to 100-point scale, with  
231 higher scores indicating severe symptoms and better HRQL.

232 One-hour pad test is the only tool standardized with a set protocol to measure the  
233 urinary leakage<sup>18</sup>. Participants will be instructed to drink 500 ml solid-free water, and  
234 perform a series of activities including standing and sitting, coughing, running,  
235 picking up a coin and putting hands under water. The leakage amount in one hour will  
236 be measured via pad.<sup>26</sup>

237 PGI-I is a global index, with only one item, used to rate the participants' subject  
238 perception on symptom improvement. Participants will describe their impression from  
239 very much better to very much worse.<sup>27</sup> Improvement was considered to be clinically  
240 significant if the participant's response is "Much better" or "Very much better".

241 To assess participants' expectations of improvement in UI, at baseline, participants  
242 will be asked how do they expect the UI to be in two months. They will choose the  
243 answer form the options of "Much better", "Better", "Don't know", "Same", and  
244 "Worse".

245 To assess participants' belief that acupuncture might help, both at baseline and  
246 week 4, participants in the EA and SA groups will be asked how do they think their  
247 incontinence problem may be helped by acupuncture. They will choose the answer  
248 from the options of "Very ineffective", "Fairly ineffective", "Can't decide",  
249 "Effective", and "Very effective".

250 Safety assessment

1  
2  
3  
4 251 Adverse events (AEs), associated with the intervention or not, will be monitored  
5  
6 252 and documented by participants and research assistants in Adverse Event Record  
7  
8 253 Form and CRF throughout the trial. Whether the events are related to the treatments  
9  
10 254 will be decided by acupuncturists and related specialists in each site within 24 hours  
11  
12 255 of occurrence. Acupuncture related AEs are defined as following: broken needle,  
13  
14 256 needle phobia, intense pain that is unbearable, bleeding, hematoma, infection or  
15  
16 257 abscess at the needling site, and other discomfort induced by acupuncture, such as  
17  
18 258 pain, nausea, vomiting, palpitation, dizziness, headache, loss of appetite, or insomnia  
19  
20 259 that lasts for one hour or longer after treatment.

### 21 22 260 **Quality control**

23  
24 261 To ensure consistency of the study, personnel in recruitment sites will receive  
25  
26 262 exactly the same training from the principal investigator (ZS Liu) concerning the  
27  
28 263 protocol, manipulating methods of acupuncture and blinding of participants, etc.

29  
30 264 At least two acupuncturists (with no less than two-year clinical experience) are  
31  
32 265 needed for rotation in each site, while the 24-session treatment of each participant  
33  
34 266 should be completed by one specific acupuncturist. Additionally, the same  
35  
36 267 participants should be taken charge of by the same research assistant/outcome  
37  
38 268 assessor throughout the trial. They will instruct participants to complete voiding diary,  
39  
40 269 explain the contents of handbook if necessary, and remind the participants of their  
41  
42 270 schedule by phone or we-chat.

43  
44 271 To promote the adherence on lifestyle modification, the research assistants will  
45  
46 272 remind the participants to adjust their lifestyle per the suggestions and record the  
47  
48 273 changes of condition and lifestyle on Lifestyle Record Form every week. On each  
49  
50 274 outcome assessment visit, the forms will be collected and examined by outcome  
51  
52 275 assessors, and recorded in CRF in time.

53  
54 276 All the data collected will be documented in paper CRF first, and typed into EDC  
55  
56 277 system within one week. This rule is set to ensure the data be traced back, monitored  
57  
58 278 by the system automatically and CRA, and supplemented without delay, if missing or  
59  
60

1  
2  
3  
4 279 inaccuracy. In follow-up period, missing data in voiding diary can be asked by phone  
5  
6 280 rather than in person. The database will be protected by a password and only the  
7  
8 281 principal investigator will have access to the final dataset. Data are available upon  
9  
10 282 reasonable request to the principal investigator, excluding the private information of  
11  
12 283 patients.

#### 13 14 284 **Sample size**

15  
16 285 Based on our previous study<sup>14 15</sup>, we assume that 25% participants in the SA group  
17  
18 286 will have at least 50% reduction of mean stress IEF from baseline to week 8. To  
19  
20 287 detect a difference of 23% between the EA and SA group, a sample size of 232  
21  
22 288 participants will need to provide the trial with 80% power with a two-sided  
23  
24 289 significance level of 0.05 and 10% dropouts.

#### 25 26 290 **Statistical analysis**

27  
28 291 For primary hypothesis, we will compare the proportion of participants with at least  
29  
30 292 50% reduction in mean 24-hour stress IEF at week 8 among the three groups. The  
31  
32 293 primary outcome analysis will use the Cochran-Mantel-Haenszel (CMH) test to  
33  
34 294 compare the rate of participants with at least 50% reduction in stress IEF at week 8  
35  
36 295 between the EA group and the WL group. If this analysis is significant, the  
37  
38 296 hierarchical testing will be used the EA group versus the SA group.

39  
40 297 For other categorical variables, comparisons between treatment groups will be  
41  
42 298 assessed using the Fisher exact test or Chi-squared test as appropriate. We will use the  
43  
44 299 *t* test or Wilcoxon rank-sum test to analyze change of urinary leakage amount from  
45  
46 300 baseline, change of mean 24-hour IEF from baseline, change of total and sub-score of  
47  
48 301 ICIQ-SF from baseline, change of 24-h urgency episodes from baseline, and other  
49  
50 302 continuous variables. Chi-square or Fisher's exact tests will be used to compare the  
51  
52 303 frequency of AEs between groups.

53  
54 304 All outcomes will be analyzed in intention to treat (ITT) population (defined as  
55  
56 305 participants randomized). Analysis will be performed using SAS version 9.4 (SAS  
57  
58 306 Institute Inc) with a two-sided *P* value of less than .05 considered significant.

### 307 **Ethics and dissemination**

308 The protocol was approved by Guang'anmen Hospital Institution of Review Board  
309 (2019-241-KY). It is registered on Clinicaltrials.gov (NCT04299932), and any  
310 revision of the protocol will be reported on the website. The trial will be conducted  
311 according to the Declaration of Helsinki and the International Conference on  
312 Harmonization Good Clinical Practice E6 Guidance for Good Clinical Practice.  
313 Detailed information of the trial will be informed to the participants and written  
314 informed content will be obtained from every participant before randomization.  
315 Participants in WL group will receive 24-session EA treatment for compensation.  
316 Results of the trial will be expected to be published on a peer-reviewed journal.

### 317 **DISCUSSION**

318 MUI is a condition frustrating almost thirty percent of women globally, while about  
319 half of them feel embarrassed to report<sup>3 5</sup>. The physiology underlying MUI remains  
320 unclear. Intrinsic urethral sphincter deficiency caused by weak pelvic floor muscles  
321 have been proposed as the main pathophysiology of SUI<sup>28</sup> and detrusor overactivity is  
322 one of the main reasons leading to UUI<sup>11</sup>. Via acupuncture point BL33 and BL35,  
323 electroacupuncture may stimulate the S3 nerve and both motor and afferent fibers of  
324 the pudendal nerve, which can not only strengthen the pelvic muscles and raise the  
325 patient's awareness of these muscles, but also decrease the sensation of urgency and  
326 inhibit parasympathetic activity and involuntary detrusor contractions<sup>29</sup>.

327 Since plenty of patients in China have received acupuncture before, the form of  
328 superficial insertion at non-acupoint area with minimal and transient electric current is  
329 applied as sham control to eliminate placebo effects. The superficial insertion enables  
330 participants to promptly percept the stimulation and electric current, which may  
331 further enhance the blinding even if it lasts only about 30 seconds. It is argued that  
332 minimal acupuncture may evoke physiologic effects<sup>30</sup>, especially for pain and  
333 depression<sup>31 32</sup>. However, the pathology of MUI is mainly sphincter insufficiency and  
334 detrusor overactivity. Studies indicates the rheobase of the normal bladder was 1-

1  
2  
3  
4 335 5mA<sup>33</sup>. The transient and minimal current output may not produce effects on the  
5  
6 336 function of bladder. In the WL group, participants only receive healthcare education  
7  
8 337 and lifestyle modification. The WL-control is applied to eliminate the influence of  
9  
10 338 disease's natural cause.

11 339 Limitation also exists in the design of this trial. Participants in WL group and  
12  
13 340 acupuncturists cannot be blinded, which might induce performance and detection bias  
14  
15 341 into the trial. However, large bias is unlikely to be induced to the results since the  
16  
17 342 primary outcome of stress IEF is subjective; and to decrease influence towards the  
18  
19 343 results, the outcome assessment will be undertaken by an independent research  
20  
21 344 assistant who know nothing about the allocation.  
22  
23  
24  
25  
26  
27  
28  
29  
30  
31  
32  
33  
34  
35  
36  
37  
38  
39  
40  
41  
42  
43  
44  
45  
46  
47  
48  
49  
50  
51  
52  
53  
54  
55  
56  
57  
58  
59  
60



1  
2  
3  
4 345 **Ethical Approval and Consent to participate:** The study has received approval  
5  
6 346 from the Guang'anmen Hospital Institution of Review Board (2019-241-KY). Written  
7  
8 347 informed content will be obtained from every participant.

9  
10 348 **Consent for publication:** Not applicable.

11  
12 349 **Authors' contributions:** Zhishun Liu conceived the study, initiated the design, and  
13  
14 350 revised the manuscript; Yan Liu is responsible for statistical analysis plan and drafted  
15  
16 351 the manuscript; Yuanjie Sun participated the design and drafted the manuscript; Huan  
17  
18 352 Chen participated the design and revised the manuscript; Yan Yan helped to draft the  
19  
20 353 manuscript. All authors have read and approved the final manuscript.

21  
22 354 **Funding statement:** This work was supported by “The 13th Five-year” National  
23  
24 355 Science and Technology Pillar Program (grant number 2017YFC1703602) by the  
25  
26 356 Ministry of Science and Technology of the People's Republic of China. They have no  
27  
28 357 role in study design and will have no role in collection, management, analysis, and  
29  
30 358 interpretation of data; writing of the report; and the decision to submit the report for  
31  
32 359 publication.

33  
34 360 **Competing interests:** The author declare that they have no competing interests.

35  
36 361 **Acknowledgements:** Appreciation to every participant in the trial and every  
37  
38 362 personnel in recruitment centers for their contributions.  
39  
40  
41  
42  
43  
44  
45  
46  
47  
48  
49  
50  
51  
52  
53  
54  
55  
56  
57  
58  
59  
60

364 **Reference:**

- 365 1. Haylen BT, de Ridder D, Freeman RM, et al. An International Urogynecological  
366 Association (IUGA)/International Continence Society (ICS) joint report on the  
367 terminology for female pelvic floor dysfunction. *Neurourol Urodyn* 2010;29(1):4-20.  
368 doi: 10.1002/nau.20798 [published Online First: 2009/11/27]
- 369 2. Minassian VA, Devore E, Hagan K, et al. Severity of urinary incontinence and  
370 effect on quality of life in women by incontinence type. *Obstet Gynecol*  
371 2013;121(5):1083-90. doi: 10.1097/AOG.0b013e31828ca761 [published Online First:  
372 2013/05/03]
- 373 3. Dooley Y, Lowenstein L, Kenton K, et al. Mixed incontinence is more bothersome  
374 than pure incontinence subtypes. *Int Urogynecol J Pelvic Floor Dysfunct*  
375 2008;19(10):1359-62. doi: 10.1007/s00192-008-0637-4 [published Online First:  
376 2008/05/21]
- 377 4. Zhu L, Li L, Lang J, et al. Epidemiology of mixed urinary incontinence in China.  
378 *Int J Gynaecol Obstet* 2010;109(1):55-8. doi: 10.1016/j.ijgo.2009.10.017 [published  
379 Online First: 2009/12/22]
- 380 5. Thom DH, van den Eeden SK, Ragins AI, et al. Differences in Prevalence of  
381 Urinary Incontinence by Race/Ethnicity. *Journal of Urology* 2006;175(1):259-64. doi:  
382 10.1016/s0022-5347(05)00039-x
- 383 6. Myers DL. Female mixed urinary incontinence: a clinical review. *JAMA*  
384 2014;311(19):2007-14. doi: 10.1001/jama.2014.4299 [published Online First:  
385 2014/05/23]
- 386 7. Burkhard FC, Bosch JLHR, Cruz F, et al. EAU guidelines on urinary incontinence  
387 in adults. <https://uroweb.org/guideline/urinary-incontinence>. Accessed November 4,  
388 2017.
- 389 8. Dumoulin C, Cacciari LP, Hay-Smith EJC. Pelvic floor muscle training versus no  
390 treatment, or inactive control treatments, for urinary incontinence in women.  
391 *Cochrane Database Syst Rev* 2018;10:CD005654. doi:  
392 10.1002/14651858.CD005654.pub4 [published Online First: 2018/10/06]
- 393 9. Bo K, Kvarstein B, Nygaard I. Lower urinary tract symptoms and pelvic floor  
394 muscle exercise adherence after 15 years. *Obstet Gynecol* 2005;105(5 Pt 1):999-1005.  
395 doi: 10.1097/01.AOG.0000157207.95680.6d [published Online First: 2005/05/03]
- 396 10. Labrie J, Berghmans BL, Fischer K, et al. Surgery versus physiotherapy for stress  
397 urinary incontinence. *New Engl J Med* 2013;369(12):1124-33. doi:  
398 10.1056/NEJMoa1210627 [published Online First: 2013/09/21]
- 399 11. Aoki Y, Brown HW, Brubaker L, et al. Urinary incontinence in women. *Nat Rev*  
400 *Dis Primers* 2017;3:17042. doi: 10.1038/nrdp.2017.42 [published Online First:  
401 2017/07/07]
- 402 12. Lee JK, Dwyer PL, Rosamilia A, et al. Persistence of urgency and urge urinary  
403 incontinence in women with mixed urinary symptoms after midurethral slings: a  
404 multivariate analysis. *BJOG* 2011;118(7):798-805. doi: 10.1111/j.1471-

- 1  
2  
3 405 0528.2011.02915.x [published Online First: 2011/03/12]  
4  
5 406 13. Richter HE, Litman HJ, Lukacz ES, et al. Demographic and clinical predictors of  
6 407 treatment failure one year after midurethral sling surgery. *Obstet Gynecol*  
7 408 2011;117(4):913-21. doi: 10.1097/AOG.0b013e31820f3892 [published Online First:  
8 409 2011/03/23]  
9  
10 410 14. Liu Z, Liu Y, Xu H, et al. Effect of Electroacupuncture on Urinary Leakage  
11 411 Among Women With Stress Urinary Incontinence: A Randomized Clinical Trial.  
12 412 *JAMA* 2017;317(24):2493-501. doi: 10.1001/jama.2017.7220 [published Online  
13 413 First: 2017/06/28]  
14  
15 414 15. Liu B, Liu Y, Qin Z, et al. Electroacupuncture Versus Pelvic Floor Muscle  
16 415 Training Plus Solifenacin for Women With Mixed Urinary Incontinence: A  
17 416 Randomized Noninferiority Trial. *Mayo Clin Proc* 2019;94(1):54-65. doi:  
18 417 10.1016/j.mayocp.2018.07.021 [published Online First: 2019/01/07]  
19  
20 418 16. Wang W, Liu Y, Su T, et al. Comparing the effect of electroacupuncture treatment  
21 419 on obese and non-obese women with stress urinary incontinence or stress-  
22 420 predominant mixed urinary incontinence: A secondary analysis of two randomised  
23 421 controlled trials. *Int J Clin Pract* 2019:e13435. doi: 10.1111/ijcp.13435 [published  
24 422 Online First: 2019/10/18]  
25  
26 423 17. Herzog AR, Diokno AC, Brown MB, et al. Two-year incidence, remission, and  
27 424 change patterns of urinary incontinence in noninstitutionalized older adults. *J*  
28 425 *Gerontol* 1990;45(2):M67-74. doi: 10.1093/geronj/45.2.m67 [published Online First:  
29 426 1990/03/01]  
30  
31 427 18. Krhut J, Zachoval R, Smith PP, et al. Pad weight testing in the evaluation of  
32 428 urinary incontinence. *Neurourol Urodyn* 2014;33(5):507-10. doi: 10.1002/nau.22436  
33 429 [published Online First: 2013/06/26]  
34  
35 430 19. WHO Regional Office for the Western Pacific. WHO Standard Acupuncture Point  
36 431 Locations in the Western Pacific Region. Geneva: World Health Organization Pr;  
37 432 2008.  
38  
39 433 20. Yalcin I, Peng G, Viktrup L, et al. Reductions in stress urinary incontinence  
40 434 episodes: what is clinically important for women? *Neurourol Urodyn* 2010;29(3):344-  
41 435 7. doi: 10.1002/nau.20744 [published Online First: 2009/05/29]  
42  
43 436 21. Bright E, Cotterill N, Drake M, et al. Developing and validating the International  
44 437 Consultation on Incontinence Questionnaire bladder diary. *Eur Urol* 2014;66(2):294-  
45 438 300. doi: 10.1016/j.eururo.2014.02.057 [published Online First: 2014/03/22]  
46  
47 439 22. Huang L, Zhang SW, Wu SL, et al. The Chinese version of ICIQ: a useful tool in  
48 440 clinical practice and research on urinary incontinence. *Neurourol Urodyn*  
49 441 2008;27(6):522-4. doi: 10.1002/nau.20546 [published Online First: 2008/03/21]  
50  
51 442 23. Avery K, Donovan J, Peters TJ, et al. ICIQ: a brief and robust measure for  
52 443 evaluating the symptoms and impact of urinary incontinence. *Neurourol Urodyn*  
53 444 2004;23(4):322-30. doi: 10.1002/nau.20041 [published Online First: 2004/07/01]  
54  
55 445 24. McKown S, Abraham L, Coyne K, et al. Linguistic validation of the N-QOL  
56 446 (ICIQ), OAB-q (ICIQ), PPBC, OAB-S and ICIQ-MLUTSsex questionnaires in 16

- 1  
2  
3 447 languages. *Int J Clin Pract* 2010;64(12):1643-52. doi: 10.1111/j.1742-  
4 448 1241.2010.02489.x [published Online First: 2010/08/21]  
5  
6 449 25. Coyne KS, Thompson CL, Lai JS, et al. An overactive bladder symptom and  
7 450 health-related quality of life short-form: validation of the OAB-q SF. *Neurourol*  
8 451 *Urodyn* 2015;34(3):255-63. doi: 10.1002/nau.22559 [published Online First:  
9 452 2015/03/19]  
10  
11 453 26. Abrams P, Blaivas JG, Stanton SL, et al. Standardisation of terminology of lower  
12 454 urinary tract function. *Neurourology and Urodynamics* 1988;7(5):403-27. doi:  
13 455 10.1002/nau.1930070502  
14  
15 456 27. Viktrup L, Hayes RP, Wang P, et al. Construct validation of patient global  
16 457 impression of severity (PGI-S) and improvement (PGI-I) questionnaires in the  
17 458 treatment of men with lower urinary tract symptoms secondary to benign prostatic  
18 459 hyperplasia. *BMC Urol* 2012;12:30. doi: 10.1186/1471-2490-12-30 [published Online  
19 460 First: 2012/11/09]  
20  
21 461 28. Yoshimura N, Miyazato M. Neurophysiology and therapeutic receptor targets for  
22 462 stress urinary incontinence. *International Journal of Urology* 2012;19(6):524-37. doi:  
23 463 10.1111/j.1442-2042.2012.02976.x  
24  
25 464 29. Berghmans B, Hendriks E, Bernards A, et al. Electrical stimulation with non-  
26 465 implanted electrodes for urinary incontinence in men. *Cochrane Database Syst Rev*  
27 466 2013(6):CD001202. doi: 10.1002/14651858.CD001202.pub5 [published Online First:  
28 467 2013/06/07]  
29  
30 468 30. Lund I, Naslund J, Lundeberg T. Minimal acupuncture is not a valid placebo  
31 469 control in randomised controlled trials of acupuncture: a physiologist's perspective.  
32 470 *Chin Med* 2009;4:1. doi: 10.1186/1749-8546-4-1 [published Online First:  
33 471 2009/02/03]  
34  
35 472 31. Smith CA, Armour M, Lee MS, et al. Acupuncture for depression. *Cochrane*  
36 473 *Database Syst Rev* 2018;3:CD004046. doi: 10.1002/14651858.CD004046.pub4  
37 474 [published Online First: 2018/03/05]  
38  
39 475 32. Vickers AJ, Cronin AM, Maschino AC, et al. Acupuncture for chronic pain:  
40 476 individual patient data meta-analysis. *Arch Intern Med* 2012;172(19):1444-53. doi:  
41 477 10.1001/archinternmed.2012.3654 [published Online First: 2012/09/12]  
42  
43 478 33. Katona F. Stages of vegetative afferentation in reorganization of bladder control  
44 479 during intravesical electrotherapy. *Urol Int* 1975;30(3):192-203. doi:  
45 480 10.1159/000279979 [published Online First: 1975/01/01]  
46  
47  
48  
49  
50  
51  
52  
53  
54  
55  
56  
57  
58  
59  
60

## Figure legends

Figure 1. Flow chart

Figure 2. Study schedule

\* Only for participants in the electroacupuncture and sham electroacupuncture groups  
 ICIQ-SF, International Consultation on Incontinence Questionnaire short form; OAB-q SF, Overactive Bladder Questionnaire short form; PGI-I, Patient Global Impression of Improvement.

## Table

Table 1. Secondary outcome measures

| No | Outcome measure                                                                                                              | Time Frame            |
|----|------------------------------------------------------------------------------------------------------------------------------|-----------------------|
| 1  | Proportion of participants with at least 50% reduction of urinary leakage amount from baseline.                              | week 8                |
| 2  | Change of urinary leakage amount from baseline                                                                               | week 8                |
| 3  | Proportion of participants with at least 50% reduction of mean 24-hour stress IEF from baseline.                             | weeks 4, 20 and 32    |
| 4  | Change of mean 24-hour IEF from baseline                                                                                     | weeks 4, 8, 20 and 32 |
| 5  | Change of mean 24-hour stress IEF from baseline                                                                              | weeks 4, 8, 20 and 32 |
| 6  | Proportion of participants with at least 50% reduction of mean 24-hour IEF from baseline                                     | weeks 4, 8, 20 and 32 |
| 7  | Change of total and sub-score of International Consultation on Incontinence Questionnaire-short form (ICIQ-SF) from baseline | weeks 4, 8, 20 and 32 |
| 8  | Change of total and sub-score of Overactive Bladder Questionnaire short form (OAB-q SF) from baseline                        | weeks 4, 8, 20 and 32 |
| 9  | Change of mean 24-hour pad consumption from baseline                                                                         | weeks 4, 8, 20 and 32 |
| 10 | Proportion of participants with adequate improvement assessed by Patient global impression improvement (PGI-I)               | weeks 8 and 20        |
| 11 | Change of mean 24-hour urgency episodes from baseline                                                                        | weeks 4, 8, 20 and 32 |
| 12 | Change of mean 24-hour micturition episodes from baseline                                                                    | weeks 4, 8, 20 and 32 |
| 13 | Participants' expectations of improvement to urinary incontinence                                                            | Baseline              |
| 14 | Participants' belief that acupuncture might help                                                                             | Baseline and week 4   |
| 15 | Blinding assessment                                                                                                          | Week 8                |

1  
2  
3  
4  
5  
6  
7  
8  
9  
10  
11  
12  
13  
14  
15  
16  
17  
18  
19  
20  
21  
22  
23  
24  
25  
26  
27  
28  
29  
30  
31  
32  
33  
34  
35  
36  
37  
38  
39  
40  
41  
42  
43  
44  
45  
46  
47  
48  
49  
50  
51  
52  
53  
54  
55  
56  
57  
58  
59  
60

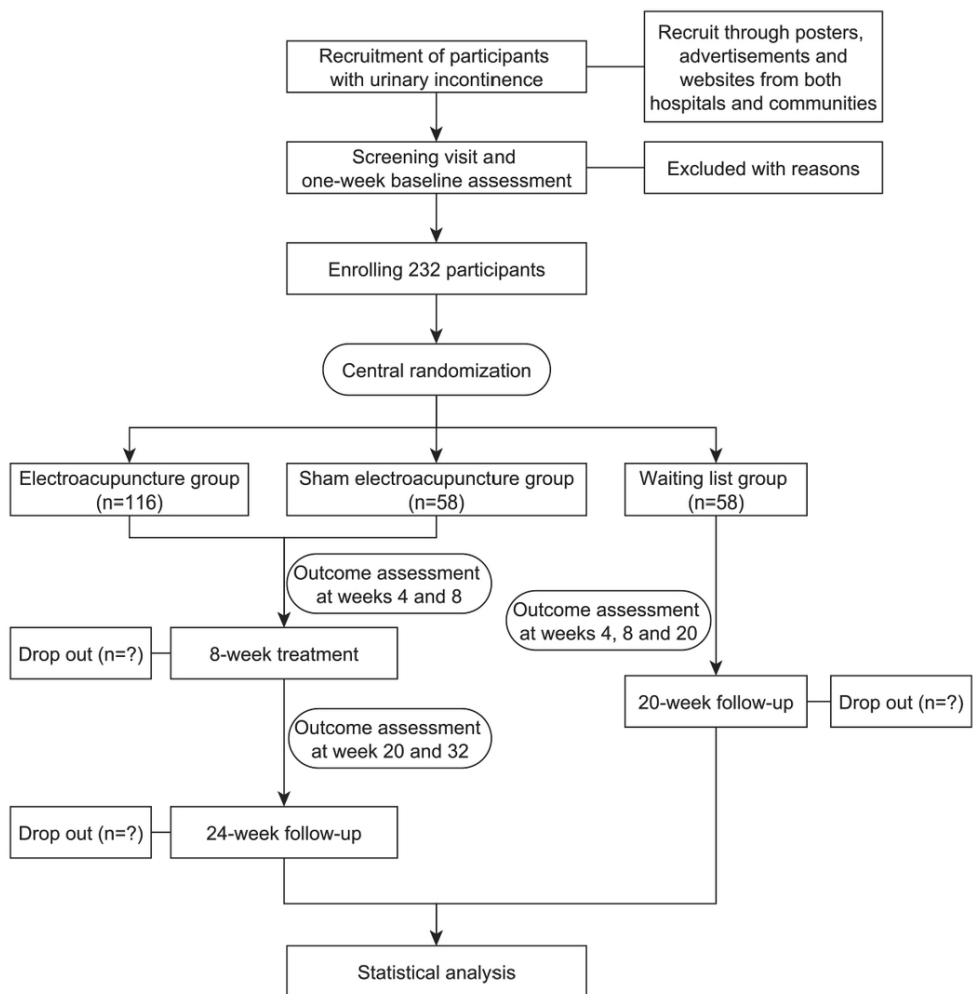

Figure 1. Flow chart

91x93mm (300 x 300 DPI)

| TIMEPOINT (W, week)        | W -1 | W 0 | W 4 | W 8 | W 20 | W 32* |
|----------------------------|------|-----|-----|-----|------|-------|
| <b>ENROLMENT</b>           |      |     |     |     |      |       |
| Eligibility screen         | ×    |     |     |     |      |       |
| Informed consent           | ×    |     |     |     |      |       |
| Allocation                 |      | ×   |     |     |      |       |
| Demography characteristics | ×    |     |     |     |      |       |
| Medical history            | ×    |     |     |     |      |       |
| Urine routine              | ×    |     |     |     |      |       |
| Residual urine volume      | ×    |     |     |     |      |       |
| Urine pregnancy test       | ×    |     |     |     |      |       |
| <b>INTERVENTIONS</b>       |      |     |     |     |      |       |
| Electroacupuncture         |      |     | ×   | ×   |      |       |
| Sham electroacupuncture    |      |     | ×   | ×   |      |       |
| Waiting list               |      |     | ×   | ×   | ×    |       |
| <b>ASSESSMENTS</b>         |      |     |     |     |      |       |
| 3-day voiding diary        | ×    |     | ×   | ×   | ×    | ×     |
| 1-hour pad test            | ×    |     |     | ×   |      |       |
| ICIQ-SF                    |      | ×   | ×   | ×   | ×    | ×     |
| OAB-q SF                   |      | ×   | ×   | ×   | ×    | ×     |
| PGI-I                      |      |     |     | ×   | ×    |       |
| Adverse events             | ×    | ×   | ×   | ×   | ×    | ×     |
| Expectation assessment     |      | ×   |     |     |      |       |
| Belief assessment*         |      | ×   | ×   |     |      |       |
| Blindness assessment*      |      |     |     | ×   |      |       |

Figure 2. Study schedule

\* Only for participants in the electroacupuncture and sham electroacupuncture groups  
 ICIQ-SF, International Consultation on Incontinence Questionnaire short form; OAB-q SF, Overactive Bladder Questionnaire short form; PGI-I, Patient Global Impression of Improvement.

91x94mm (300 x 300 DPI)

Table 1

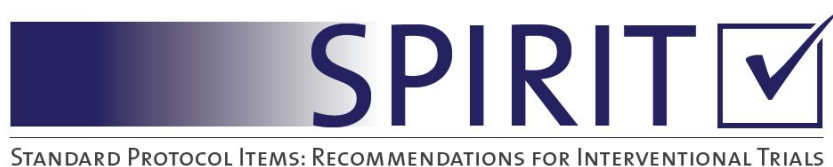

SPIRIT 2013 Checklist: Recommended items to address in a clinical trial protocol and related documents\*

| Section/item                      | Item No | Description                                                                                                                                                                                                                                                                              | Addressed on page number |
|-----------------------------------|---------|------------------------------------------------------------------------------------------------------------------------------------------------------------------------------------------------------------------------------------------------------------------------------------------|--------------------------|
| <b>Administrative information</b> |         |                                                                                                                                                                                                                                                                                          |                          |
| Title                             | 1       | Descriptive title identifying the study design, population, interventions, and, if applicable, trial acronym                                                                                                                                                                             | 1                        |
| Trial registration                | 2a      | Trial identifier and registry name. If not yet registered, name of intended registry                                                                                                                                                                                                     | 2                        |
|                                   | 2b      | All items from the World Health Organization Trial Registration Data Set                                                                                                                                                                                                                 | 5-12                     |
| Protocol version                  | 3       | Date and version identifier                                                                                                                                                                                                                                                              | 2                        |
| Funding                           | 4       | Sources and types of financial, material, and other support                                                                                                                                                                                                                              | 15                       |
| Roles and responsibilities        | 5a      | Names, affiliations, and roles of protocol contributors                                                                                                                                                                                                                                  | 1,15                     |
|                                   | 5b      | Name and contact information for the trial sponsor                                                                                                                                                                                                                                       | 15                       |
|                                   | 5c      | Role of study sponsor and funders, if any, in study design; collection, management, analysis, and interpretation of data; writing of the report; and the decision to submit the report for publication, including whether they will have ultimate authority over any of these activities | 15                       |
|                                   | 5d      | Composition, roles, and responsibilities of the coordinating centre, steering committee, endpoint adjudication committee, data management team, and other individuals or groups overseeing the trial, if applicable (see Item 21a for data monitoring committee)                         | NA                       |



## Introduction

|                          |    |                                                                                                                                                                                                           |     |
|--------------------------|----|-----------------------------------------------------------------------------------------------------------------------------------------------------------------------------------------------------------|-----|
| Background and rationale | 6a | Description of research question and justification for undertaking the trial, including summary of relevant studies (published and unpublished) examining benefits and harms for each intervention        | 4-5 |
|                          | 6b | Explanation for choice of comparators                                                                                                                                                                     | 14  |
| Objectives               | 7  | Specific objectives or hypotheses                                                                                                                                                                         | 4-5 |
| Trial design             | 8  | Description of trial design including type of trial (eg, parallel group, crossover, factorial, single group), allocation ratio, and framework (eg, superiority, equivalence, noninferiority, exploratory) | 5   |

## Methods: Participants, interventions, and outcomes

|                      |     |                                                                                                                                                                                                                                                                                                                                                                                |               |
|----------------------|-----|--------------------------------------------------------------------------------------------------------------------------------------------------------------------------------------------------------------------------------------------------------------------------------------------------------------------------------------------------------------------------------|---------------|
| Study setting        | 9   | Description of study settings (eg, community clinic, academic hospital) and list of countries where data will be collected. Reference to where list of study sites can be obtained                                                                                                                                                                                             | 5             |
| Eligibility criteria | 10  | Inclusion and exclusion criteria for participants. If applicable, eligibility criteria for study centres and individuals who will perform the interventions (eg, surgeons, psychotherapists)                                                                                                                                                                                   | 5-7           |
| Interventions        | 11a | Interventions for each group with sufficient detail to allow replication, including how and when they will be administered                                                                                                                                                                                                                                                     | 7-9           |
|                      | 11b | Criteria for discontinuing or modifying allocated interventions for a given trial participant (eg, drug dose change in response to harms, participant request, or improving/worsening disease)                                                                                                                                                                                 | 9             |
|                      | 11c | Strategies to improve adherence to intervention protocols, and any procedures for monitoring adherence (eg, drug tablet return, laboratory tests)                                                                                                                                                                                                                              | 11            |
|                      | 11d | Relevant concomitant care and interventions that are permitted or prohibited during the trial                                                                                                                                                                                                                                                                                  | 9             |
| Outcomes             | 12  | Primary, secondary, and other outcomes, including the specific measurement variable (eg, systolic blood pressure), analysis metric (eg, change from baseline, final value, time to event), method of aggregation (eg, median, proportion), and time point for each outcome. Explanation of the clinical relevance of chosen efficacy and harm outcomes is strongly recommended | 9-11, Table 1 |

|                      |    |                                                                                                                                                                                       |          |
|----------------------|----|---------------------------------------------------------------------------------------------------------------------------------------------------------------------------------------|----------|
| Participant timeline | 13 | Time schedule of enrolment, interventions (including any run-ins and washouts), assessments, and visits for participants. A schematic diagram is highly recommended (see Figure)      | Figure 2 |
| Sample size          | 14 | Estimated number of participants needed to achieve study objectives and how it was determined, including clinical and statistical assumptions supporting any sample size calculations | 12       |
| Recruitment          | 15 | Strategies for achieving adequate participant enrolment to reach target sample size                                                                                                   | 5,7      |

### Methods: Assignment of interventions (for controlled trials)

#### Allocation:

|                                  |     |                                                                                                                                                                                                                                                                                                                                                          |    |
|----------------------------------|-----|----------------------------------------------------------------------------------------------------------------------------------------------------------------------------------------------------------------------------------------------------------------------------------------------------------------------------------------------------------|----|
| Sequence generation              | 16a | Method of generating the allocation sequence (eg, computer-generated random numbers), and list of any factors for stratification. To reduce predictability of a random sequence, details of any planned restriction (eg, blocking) should be provided in a separate document that is unavailable to those who enrol participants or assign interventions | 7  |
| Allocation concealment mechanism | 16b | Mechanism of implementing the allocation sequence (eg, central telephone; sequentially numbered, opaque, sealed envelopes), describing any steps to conceal the sequence until interventions are assigned                                                                                                                                                | 7  |
| Implementation                   | 16c | Who will generate the allocation sequence, who will enrol participants, and who will assign participants to interventions                                                                                                                                                                                                                                | 7  |
| Blinding (masking)               | 17a | Who will be blinded after assignment to interventions (eg, trial participants, care providers, outcome assessors, data analysts), and how                                                                                                                                                                                                                | 7  |
|                                  | 17b | If blinded, circumstances under which unblinding is permissible, and procedure for revealing a participant's allocated intervention during the trial                                                                                                                                                                                                     | NA |

### Methods: Data collection, management, and analysis

|                         |     |                                                                                                                                                                                                                                                                                                                                                                                                              |      |
|-------------------------|-----|--------------------------------------------------------------------------------------------------------------------------------------------------------------------------------------------------------------------------------------------------------------------------------------------------------------------------------------------------------------------------------------------------------------|------|
| Data collection methods | 18a | Plans for assessment and collection of outcome, baseline, and other trial data, including any related processes to promote data quality (eg, duplicate measurements, training of assessors) and a description of study instruments (eg, questionnaires, laboratory tests) along with their reliability and validity, if known. Reference to where data collection forms can be found, if not in the protocol | 9-12 |
|-------------------------|-----|--------------------------------------------------------------------------------------------------------------------------------------------------------------------------------------------------------------------------------------------------------------------------------------------------------------------------------------------------------------------------------------------------------------|------|

|                     |     |                                                                                                                                                                                                                                                                   |       |
|---------------------|-----|-------------------------------------------------------------------------------------------------------------------------------------------------------------------------------------------------------------------------------------------------------------------|-------|
|                     | 18b | Plans to promote participant retention and complete follow-up, including list of any outcome data to be collected for participants who discontinue or deviate from intervention protocols                                                                         | 11-12 |
| Data management     | 19  | Plans for data entry, coding, security, and storage, including any related processes to promote data quality (eg, double data entry; range checks for data values). Reference to where details of data management procedures can be found, if not in the protocol | 11-12 |
| Statistical methods | 20a | Statistical methods for analysing primary and secondary outcomes. Reference to where other details of the statistical analysis plan can be found, if not in the protocol                                                                                          | 12    |
|                     | 20b | Methods for any additional analyses (eg, subgroup and adjusted analyses)                                                                                                                                                                                          | NA    |
|                     | 20c | Definition of analysis population relating to protocol non-adherence (eg, as randomised analysis), and any statistical methods to handle missing data (eg, multiple imputation)                                                                                   | 12    |

### Methods: Monitoring

|                 |     |                                                                                                                                                                                                                                                                                                                                       |       |
|-----------------|-----|---------------------------------------------------------------------------------------------------------------------------------------------------------------------------------------------------------------------------------------------------------------------------------------------------------------------------------------|-------|
| Data monitoring | 21a | Composition of data monitoring committee (DMC); summary of its role and reporting structure; statement of whether it is independent from the sponsor and competing interests; and reference to where further details about its charter can be found, if not in the protocol. Alternatively, an explanation of why a DMC is not needed | NA    |
|                 | 21b | Description of any interim analyses and stopping guidelines, including who will have access to these interim results and make the final decision to terminate the trial                                                                                                                                                               | NA    |
| Harms           | 22  | Plans for collecting, assessing, reporting, and managing solicited and spontaneously reported adverse events and other unintended effects of trial interventions or trial conduct                                                                                                                                                     | 10-11 |
| Auditing        | 23  | Frequency and procedures for auditing trial conduct, if any, and whether the process will be independent from investigators and the sponsor                                                                                                                                                                                           | NA    |

### Ethics and dissemination

|                          |    |                                                                                           |       |
|--------------------------|----|-------------------------------------------------------------------------------------------|-------|
| Research ethics approval | 24 | Plans for seeking research ethics committee/institutional review board (REC/IRB) approval | 13,15 |
|--------------------------|----|-------------------------------------------------------------------------------------------|-------|

|    |                   |     |                                                                                   |         |
|----|-------------------|-----|-----------------------------------------------------------------------------------|---------|
| 1  |                   |     |                                                                                   |         |
| 2  |                   |     |                                                                                   |         |
| 3  |                   |     |                                                                                   |         |
| 4  |                   |     |                                                                                   |         |
| 5  | Protocol          | 25  | Plans for communicating important protocol modifications (eg, changes to          | 13      |
| 6  | amendments        |     | eligibility criteria, outcomes, analyses) to relevant parties (eg, investigators, |         |
| 7  |                   |     | REC/IRBs, trial participants, trial registries, journals, regulators)             |         |
| 8  |                   |     |                                                                                   |         |
| 9  | Consent or        | 26a | Who will obtain informed consent or assent from potential trial participants      | 13      |
| 10 | assent            |     | or authorised surrogates, and how (see Item 32)                                   |         |
| 11 |                   |     |                                                                                   |         |
| 12 |                   | 26b | Additional consent provisions for collection and use of participant data and      | NA      |
| 13 |                   |     | biological specimens in ancillary studies, if applicable                          |         |
| 14 |                   |     |                                                                                   |         |
| 15 |                   |     |                                                                                   |         |
| 16 | Confidentiality   | 27  | How personal information about potential and enrolled participants will be        | 11-12   |
| 17 |                   |     | collected, shared, and maintained in order to protect confidentiality before,     |         |
| 18 |                   |     | during, and after the trial                                                       |         |
| 19 |                   |     |                                                                                   |         |
| 20 | Declaration of    | 28  | Financial and other competing interests for principal investigators for the       | 15      |
| 21 | interests         |     | overall trial and each study site                                                 |         |
| 22 |                   |     |                                                                                   |         |
| 23 | Access to         | 29  | Statement of who will have access to the final trial dataset, and disclosure      | 11-12   |
| 24 | data              |     | of contractual agreements that limit such access for investigators                |         |
| 25 |                   |     |                                                                                   |         |
| 26 |                   |     |                                                                                   |         |
| 27 | Ancillary and     | 30  | Provisions, if any, for ancillary and post-trial care, and for compensation to    | 9,13    |
| 28 | post-trial care   |     | those who suffer harm from trial participation                                    |         |
| 29 |                   |     |                                                                                   |         |
| 30 | Dissemination     | 31a | Plans for investigators and sponsor to communicate trial results to               | 12      |
| 31 | policy            |     | participants, healthcare professionals, the public, and other relevant groups     |         |
| 32 |                   |     | (eg, via publication, reporting in results databases, or other data sharing       |         |
| 33 |                   |     | arrangements), including any publication restrictions                             |         |
| 34 |                   |     |                                                                                   |         |
| 35 |                   |     |                                                                                   |         |
| 36 |                   | 31b | Authorship eligibility guidelines and any intended use of professional            | NA      |
| 37 |                   |     | writers                                                                           |         |
| 38 |                   |     |                                                                                   |         |
| 39 |                   | 31c | Plans, if any, for granting public access to the full protocol, participant-level | 11-12   |
| 40 |                   |     | dataset, and statistical code                                                     |         |
| 41 |                   |     |                                                                                   |         |
| 42 |                   |     |                                                                                   |         |
| 43 | <b>Appendices</b> |     |                                                                                   |         |
| 44 |                   |     |                                                                                   |         |
| 45 | Informed          | 32  | Model consent form and other related documentation given to participants          | Content |
| 46 | consent           |     | and authorised surrogates                                                         | inform  |
| 47 | materials         |     |                                                                                   |         |
| 48 |                   |     |                                                                                   |         |
| 49 | Biological        | 33  | Plans for collection, laboratory evaluation, and storage of biological            | NA      |
| 50 | specimens         |     | specimens for genetic or molecular analysis in the current trial and for          |         |
| 51 |                   |     | future use in ancillary studies, if applicable                                    |         |
| 52 |                   |     |                                                                                   |         |
| 53 |                   |     |                                                                                   |         |
| 54 |                   |     |                                                                                   |         |
| 55 |                   |     |                                                                                   |         |
| 56 |                   |     |                                                                                   |         |
| 57 |                   |     |                                                                                   |         |
| 58 |                   |     |                                                                                   |         |
| 59 |                   |     |                                                                                   |         |
| 60 |                   |     |                                                                                   |         |

1  
2  
3  
4  
5 \*It is strongly recommended that this checklist be read in conjunction with the SPIRIT 2013 Explanation &  
6 Elaboration for important clarification on the items. Amendments to the protocol should be tracked and dated.  
7 The SPIRIT checklist is copyrighted by the SPIRIT Group under the Creative Commons "[Attribution-  
8 NonCommercial-NoDerivs 3.0 Unported](#)" license.  
9  
10  
11  
12  
13  
14  
15  
16  
17  
18  
19  
20  
21  
22  
23  
24  
25  
26  
27  
28  
29  
30  
31  
32  
33  
34  
35  
36  
37  
38  
39  
40  
41  
42  
43  
44  
45  
46  
47  
48  
49  
50  
51  
52  
53  
54  
55  
56  
57  
58  
59  
60

# BMJ Open

## Electroacupuncture for stress-predominant mixed urinary incontinence: a protocol for a three-armed randomized controlled trial

|                                 |                                                                                                                                                                                                                                                                                                                                                                                                                                                                                                                                                                                                         |
|---------------------------------|---------------------------------------------------------------------------------------------------------------------------------------------------------------------------------------------------------------------------------------------------------------------------------------------------------------------------------------------------------------------------------------------------------------------------------------------------------------------------------------------------------------------------------------------------------------------------------------------------------|
| Journal:                        | <i>BMJ Open</i>                                                                                                                                                                                                                                                                                                                                                                                                                                                                                                                                                                                         |
| Manuscript ID                   | bmjopen-2020-038452.R2                                                                                                                                                                                                                                                                                                                                                                                                                                                                                                                                                                                  |
| Article Type:                   | Protocol                                                                                                                                                                                                                                                                                                                                                                                                                                                                                                                                                                                                |
| Date Submitted by the Author:   | 18-Dec-2020                                                                                                                                                                                                                                                                                                                                                                                                                                                                                                                                                                                             |
| Complete List of Authors:       | Sun, Yuanjie; China Academy of Traditional Chinese Medicine Guanganmen Hospital, Department of Acupuncture<br>Liu, Yan; Beijing University of Chinese Medicine Affiliated Dongzhimen Hospital, Key Laboratory of Chinese Internal Medicine of Ministry of Education<br>Chen, Huan; China Academy of Traditional Chinese Medicine Guanganmen Hospital, Department of Acupuncture<br>Yan, Yan; China Academy of Traditional Chinese Medicine Guanganmen Hospital, Department of Acupuncture<br>Liu, zhishun; China Academy of Traditional Chinese Medicine Guanganmen Hospital, Department of Acupuncture |
| <b>Primary Subject Heading</b>: | Complementary medicine                                                                                                                                                                                                                                                                                                                                                                                                                                                                                                                                                                                  |
| Secondary Subject Heading:      | Urology, Complementary medicine                                                                                                                                                                                                                                                                                                                                                                                                                                                                                                                                                                         |
| Keywords:                       | Urinary incontinences < UROLOGY, Bladder disorders < UROLOGY, COMPLEMENTARY MEDICINE                                                                                                                                                                                                                                                                                                                                                                                                                                                                                                                    |
|                                 |                                                                                                                                                                                                                                                                                                                                                                                                                                                                                                                                                                                                         |

SCHOLARONE™  
Manuscripts



I, the Submitting Author has the right to grant and does grant on behalf of all authors of the Work (as defined in the below author licence), an exclusive licence and/or a non-exclusive licence for contributions from authors who are: i) UK Crown employees; ii) where BMJ has agreed a CC-BY licence shall apply, and/or iii) in accordance with the terms applicable for US Federal Government officers or employees acting as part of their official duties; on a worldwide, perpetual, irrevocable, royalty-free basis to BMJ Publishing Group Ltd ("BMJ") its licensees and where the relevant Journal is co-owned by BMJ to the co-owners of the Journal, to publish the Work in this journal and any other BMJ products and to exploit all rights, as set out in our [licence](#).

The Submitting Author accepts and understands that any supply made under these terms is made by BMJ to the Submitting Author unless you are acting as an employee on behalf of your employer or a postgraduate student of an affiliated institution which is paying any applicable article publishing charge ("APC") for Open Access articles. Where the Submitting Author wishes to make the Work available on an Open Access basis (and intends to pay the relevant APC), the terms of reuse of such Open Access shall be governed by a Creative Commons licence – details of these licences and which [Creative Commons](#) licence will apply to this Work are set out in our licence referred to above.

Other than as permitted in any relevant BMJ Author's Self Archiving Policies, I confirm this Work has not been accepted for publication elsewhere, is not being considered for publication elsewhere and does not duplicate material already published. I confirm all authors consent to publication of this Work and authorise the granting of this licence.

1  
2  
3  
4 1 Title page

5  
6 2

7  
8 3 Article title:

9  
10 4 **Electroacupuncture for stress-predominant mixed urinary**  
11 **incontinence: a protocol for a three-armed randomized controlled**  
12 **trial**

13  
14  
15  
16 7 Yuanjie Sun, MD<sup>1\*</sup>; Yan Liu, MD<sup>2\*</sup>; Huan Chen, MD, MSc<sup>1</sup>; Yan Yan, BS<sup>1</sup>; Zhishun  
17  
18 8 Liu, MD, PhD<sup>1†</sup>

19  
20 9

21  
22 10 1 Department of Acupuncture, Guang'anmen Hospital, China Academy of Chinese  
23  
24 11 Medical Sciences, Beijing, China

25  
26 12 2 Key Laboratory of Chinese Internal Medicine of Ministry of Education,  
27  
28 13 Dongzhimen Hospital, Beijing University of Chinese Medicine, Beijing, China

29  
30 14

31  
32 15 \*Yuanjie Sun and Yan Liu contributed equally to this work and shared the first author  
33  
34 16 position.

35  
36 17

37  
38 18 †Corresponding author: Department of Acupuncture, Guang'anmen Hospital, China  
39  
40 19 Academy of Chinese Medical Sciences, Beijing, China. Tel. +86 10 88002331; Fax:  
41  
42 20 +86 10 88001241; E-mail address: zhishunjournal@163.com (Zhishun Liu).

43  
44 21 **Running title:** acupuncture for stress-predominant mixed urinary incontinence

45  
46 22 **Word count:** abstract 191; main text 3388



1  
2  
3  
4 23 **Abstract**

5 24 **Introduction:** Evidence specific for stress-predominant mixed urinary incontinence is  
6  
7 still lack at present, and acupuncture may relieve the symptoms. We plan to conduct  
8 25  
9 this multi-center, three-armed, randomized controlled trial to investigate the efficacy  
10 26  
11 and safety of electroacupuncture among women with stress-predominant mixed  
12 27  
13 urinary incontinence.  
14 28

15 29 **Methods and analysis:** The trial will be conducted at 5 hospitals in China. 232  
16  
17 eligible women will be randomly assigned (2:1:1) to the electroacupuncture, sham  
18 30  
19 electroacupuncture or waiting list group to receive either 24-session  
20 31  
21 acupuncture/sham acupuncture treatment over 8 weeks and 24-week follow-up, or 20-  
22 32  
23 week watchful waiting. The primary outcome is the proportion of participants with at  
24 33  
25 least 50% reduction in mean 24-hour stress incontinence episode frequencies from  
26 34  
27 baseline to week 8. The outcome will be analyzed in intention to treat population  
28 35  
29 (defined as participants randomized) with a two-sided *P* value of less than .05  
30 36  
31 considered significant.  
32 37

33 38 **Ethics and dissemination:** The protocol has been approved by Guang'anmen  
34  
35 Hospital Institutional Review Board (2019-241-KY). Detailed information of the trial  
36 39  
37 will be informed to the participants and written informed consent will be obtained  
38 40  
39 from every participant. Results of the trial are expected to be published in a peer-  
40 41  
41 reviewed journal.  
42 42

43 43 **Key words:** Acupuncture; Mixed urinary incontinence; Female; Stress urinary  
44 44  
45 incontinence  
46 46  
47

48 45 **Trial registration:** Clinicaltrials.gov identifier: NCT04299932  
49  
50  
51  
52  
53  
54  
55  
56  
57  
58  
59  
60

1  
2  
3  
4 **46 Strengths and limitations of this study**

- 5  
6 47 ➤ The first randomized controlled trial to investigate the efficacy and safety of  
7  
8 48 acupuncture on stress-predominant mixed urinary incontinence.
- 9  
10 49 ➤ Sham control and waiting-list control are designed to eliminate the influence of  
11  
12 50 placebo effects and the disease's natural course on the results.
- 13  
14 51 ➤ Minimal electroacupuncture serves as a sham control to blind participants in the  
15  
16 52 electroacupuncture and sham electroacupuncture groups.
- 17  
18 53 ➤ One limitation is that acupuncturists and participants in the waiting list group  
19  
20 54 cannot be blinded.  
21  
22  
23  
24  
25  
26  
27  
28  
29  
30  
31  
32  
33  
34  
35  
36  
37  
38  
39  
40  
41  
42  
43  
44  
45  
46  
47  
48  
49  
50  
51  
52  
53  
54  
55  
56  
57  
58  
59  
60

## 55 INTRODUCTION

56 Mixed urinary incontinence (MUI) is a complaint of involuntary loss of urine  
57 associated with both physical exertion and urgency.<sup>1</sup> It presents with more severe  
58 symptoms in comparison with pure urinary incontinence (UI), and thus puts greater  
59 burden on health of individuals and economy of the society.<sup>2</sup> Approximately 21%-  
60 33% of females in the world<sup>3</sup> and 9.4% of females in China<sup>4</sup> are troubled with MUI,  
61 while less than 50% of such population reports it to doctors and receives treatment<sup>5</sup>.

62 Stress-predominant MUI constitutes mainly of stress component. It features leakage  
63 on increased abdominal pressure, which can be induced by exertion, sneeze, cough  
64 etc. Despite the existence of leakage with urgency, stress incontinence episode  
65 frequencies (IEFs) outnumber 50% of total IEFs.<sup>6</sup>

66 Current European Association of Urology (EAU) guideline on incontinence  
67 recommends to initiate treatment for predominant component of MUI.<sup>7</sup> However, no  
68 strong evidence supports that the interventions for stress urinary incontinence (SUI) is  
69 as effective when used to treat stress-predominant MUI.<sup>6</sup> The effects of pelvic floor  
70 muscle training (PFMT), first-line therapy for pure SUI, decrease among MUI  
71 patients.<sup>8</sup> About half of patients practicing PFMT will seek help from surgery  
72 eventually in long-term follow-up<sup>9</sup>, and surgery might be more useful than PFMT for  
73 moderate to severe symptoms<sup>10</sup>. When surgery is considered for MUI, other therapies  
74 might need to be combined with to control the urgency component.<sup>11</sup> In addition, the  
75 existence of urgency symptoms might be aggravated after surgery<sup>12</sup>, and even reduce  
76 the success rate of stress incontinence operation<sup>13</sup>. Therefore, it is necessary to seek  
77 for interventions specific for stress-predominant MUI.

78 Previous studies indicates acupuncture may relieve the incontinence symptoms.<sup>14 15</sup>  
79 It is proven effective in reducing leakage amount of pure SUI<sup>14</sup> and total IEFs of  
80 MUI.<sup>15</sup> Further analysis of the two trials suggests EA might relieve the symptoms of  
81 stress-related UI.<sup>16</sup> Since the two trials didn't focus on stress-predominant MUI  
82 specifically, this multi-center, three-armed, randomized controlled is designed to

1  
2  
3  
4 83 evaluate the efficacy and safety of EA among participants with stress-predominant  
5  
6 84 MUI.

### 7 8 85 **Hypotheses**

9  
10 86 Our primary hypothesis is that the effects of EA is superior to sham  
11  
12 87 electroacupuncture (SA) and waiting list (WL) in improving proportion of stress-  
13  
14 88 predominant MUI participants with at least 50% reduction of mean 24-hour stress  
15  
16 89 IEFs from baseline to week 8.

## 17 18 90 **METHODS AND ANALYSIS**

### 19 20 91 **Study design**

21  
22 92 This is a three-armed, randomized, SA and WL-controlled trial conducted at five  
23  
24 93 recruitment sites, which are Guang'anmen Hospital, China Academy of Chinese  
25  
26 94 Medical Sciences; Hengyang Hospital Affiliated to Hunan University of Chinese  
27  
28 95 Medicine; Yantai Hospital of Traditional Chinese Medicine; The third affiliated  
29  
30 96 hospital of Beijing university of Chinese Medicine; and Jiangxi Provincial Hospital of  
31  
32 97 traditional Chinese Medicine.

33  
34 98 The study duration is 33 weeks for participants in the EA and SA groups, with one-  
35  
36 99 week baseline assessment, 8-week treatment and 24-week follow-up; while 21 weeks  
37  
38 100 for participants in the WL group, with one-week baseline assessment and 20-week  
39  
40 101 watchful waiting (Figure 1. Flow Chart). The study will start recruitment on October  
41  
42 102 9, 2020, and is anticipated to finish the treatment and follow-up on September 30,  
43  
44 103 2023. Participations in the EA and SA groups, outcome assessors, data managers and  
45  
46 104 statisticians will be blinded to the group allocation, while acupuncturists and  
47  
48 105 participants in the WL group will not be blinded for obvious reasons.

### 49 50 106 **Patient and public involvement**

51  
52 107 Patients or the public are not involved in the design, conduct, report or  
53  
54 108 dissemination of our research.

### 55 56 109 **Inclusion criteria**

57  
58 110 1) Diagnosis of MUI by the coexistence of SUI and UUI symptoms in accordance  
59  
60

- 1  
2  
3  
4 111 with EAU guideline<sup>7</sup>;
- 5  
6 112 2) Female participants aged between 35 and 75;
- 7  
8 113 3) Stress index > urge index in accordance with Medical, epidemiologic, and social  
9  
10 114 aspects of Aging(MESA) questionnaire<sup>17</sup>;
- 11  
12 115 4) Symptom of MUI for at least three months, and SUI episodes outnumber 50%  
13  
14 116 total IEFs documented in 3-day voiding diary;
- 15  
16 117 5) Less than 12 micturition episodes in average 24 hours documented in 3-day  
17  
18 118 voiding diary;
- 19  
20 119 6) Positive cough stress test;
- 21  
22 120 7) Urine leakage > 1 g in 1-hour pad test<sup>18</sup>;
- 23  
24 121 8) Voluntary participation in the trial and signed written informed consent.

25  
26 122 Participants meeting all these eight inclusion criteria might be able to be enrolled.

27  
28 123 **Exclusion criteria**

- 29  
30 124 1) Urgency-predominant MUI, pure SUI, pure UUI, overflow UI and neurogenic  
31  
32 125 bladder;
- 33  
34 126 2) Uncontrolled symptomatic urinary tract infection;
- 35  
36 127 3) Tumor in urinary system and pelvic organ;
- 37  
38 128 4) Pelvic organ prolapse  $\geq$  degree II ;
- 39  
40 129 5) Residual urine volume  $\geq$  100ml;
- 41  
42 130 6) History of treatments specific for UI, such as acupuncture, PFMT and medications  
43  
44 131 in the previous one month;
- 45  
46 132 7) History of surgery specific UI or in pelvic floor, including hysterectomy;
- 47  
48 133 8) Uncontrolled diabetes or severe high blood pressure;
- 49  
50 134 9) Nervous system diseases that may hamper the function of urinary system, such as  
51  
52 135 Multiple sclerosis, Alzheimer's disease, Parkinson's disease, spinal cord injury,  
53  
54 136 cauda equina nerve injury, or multiple system atrophy;
- 55  
56 137 10) Severe heart, lung, brain, liver, kidney, mental illness, coagulation dysfunction or  
57  
58 138 obvious cognitive dysfunction;
- 59  
60

- 1  
2  
3  
4 139 11) Installed cardiac pacemaker;  
5  
6 140 12) Inconvenient or unable to walk, run, go up and down stairs;  
7  
8 141 13) Allergy to metal, dreadfully fear of acupuncture needles or unbearable to EA;  
9  
10 142 14) Pregnant at present, plan to conceive in future one year, at lactation period or  
11  
12 143 within 12 months after childbirth.

13  
14 144 Participants with either situation mentioned above will not be enrolled in the trial.

#### 15 16 145 **Randomization and allocation concealment**

17  
18 146 The random sequence will be produced by a third independent party (Linkermed  
19  
20 147 Technology Co., Ltd. [Beijing, China]). Eligible participants will be randomly  
21  
22 148 assigned into the EA, SA or WL group at 2:1:1 ratio, stratified by recruitment sites  
23  
24 149 and using variable blocks. The random number and group allocation will be acquired  
25  
26 150 by acupuncturists in each recruitment site by logging in the Central Randomization  
27  
28 151 System and typing in basic information of eligible participants.

#### 29 30 152 **Interventions**

31  
32 153 The acupuncture point regimen and administration protocol are both based on the  
33  
34 154 results of previous studies and specialist consensus<sup>14 15</sup>. Participants in the EA group  
35  
36 155 will receive stimulation at bilateral BL33 (Zhongliao), BL35 (Huiyang) and SP6  
37  
38 156 (Sanyinjiao). BL 33 is located in the third posterior sacral foramen; BL35, 0.5  
39  
40 157 proportional bone (skeletal) cun (B-cun) ( $\approx 10\text{mm}$ ) lateral to the extremity of the  
41  
42 158 coccyx; and SP6, posterior to the medial border of the tibia, 3 B-cun superior to the  
43  
44 159 prominence of the medial malleolus.<sup>19</sup> Bilateral BL33 will be inserted by acupuncture  
45  
46 160 needles (Huatuo, Suzhou Medical Appliance) of 0.30×75mm size at an angle of 45° ,  
47  
48 161 inward and downward, till the depth of 60-70mm. Bilateral BL35 will be inserted by  
49  
50 162 needles of 0.30×75mm size, slightly outward and upward, till the depth of 60-70mm.  
51  
52 163 Bilateral SP6 will be inserted by needles of 0.30×40mm till the depth of 25-30mm.  
53  
54 164 All the needles will be lifted, thrust and twisted evenly for three times, right after  
55  
56 165 insertion, to induce the sensation of *deqi*. Electronic acupuncture apparatus (Yingdi  
57  
58 166 KWD 808 I electro pulse acupuncture therapeutic apparatus, Changzhou Yingdi

1  
2  
3  
4 167 Electronic Medical Device Co., Ltd) will be connected to the three pairs of needles  
5  
6 168 transversally, with a continuous wave of 20Hz, electric current of 2mA-6.5mA for  
7  
8 169 BL33 and BL35, and 1mA-3.5mA for SP6. The EA stimulation will last 30mins for  
9  
10 170 each session, 3 sessions a week (ideally every other day) for a succession of 8 weeks.

11  
12 171 Participants in the SA group will receive superficial insertion at bilateral sham  
13  
14 172 BL33 (Zhongliao), sham BL35 (Huiyang) and sham SP6 (Sanyinjiao). Sham BL33 is  
15  
16 173 in the area 1 B-cun ( $\approx 20$ mm) horizontally outside of BL33; sham BL35, 1 B-cun ( $\approx$   
17  
18 174 20mm) horizontally outside of BL35; Sham SP6, in the middle of SP6 and tendons.  
19  
20 175 Acupuncture needles of 0.30 $\times$ 40mm size will be inserted at a depth of 2-3mm till the  
21  
22 176 needles can stand still. No manipulation will be conducted, and the sensation of *deqi*  
23  
24 177 will not be induced. Electronic acupuncture apparatus (Yingdi KWD 808 I electro  
25  
26 178 pulse acupuncture therapeutic apparatus, Changzhou Yingdi Electronic Medical  
27  
28 179 Device Co., Ltd) will be connected to the three pairs of needles transversally, with a  
29  
30 180 continuous wave of 20Hz and minimal electric current (ideally at a degree which  
31  
32 181 participant can just percept). In about 30 seconds, the electric current will be turned  
33  
34 182 down, leaving the indicator light and ticking sound on. The treatment sessions are  
35  
36 183 similar to those in the EA group.

37  
38 184 Participants in the EA and SA groups will be blinded to the group allocation.  
39  
40 185 Acupuncturists and research assistants will be instructed not to tell the group  
41  
42 186 allocation to participants. Additionally, to avoid inadvertent unblinding, contact  
43  
44 187 between participants and project staff will be reduced as much as possible during  
45  
46 188 treatment. The manipulation of acupuncture, connecting to electronic apparatus and  
47  
48 189 withdrawal of needles will be separately undertaken by acupuncturists and another  
49  
50 190 research assistant. Participants will be treated separately with curtain drawn and their  
51  
52 191 companions waiting outside the clinic, if any. Before manipulation, participants will  
53  
54 192 be told they may feel the electrical stimulation fade down gradually, even to the  
55  
56 193 degree that they cannot percept, and that is because the body has built up a tolerance  
57  
58 194 to the electrical stimulation during the treatment process. Within 5 minutes after either  
59  
60

1  
2  
3  
4 195 treatment session at week 8, participants will be told they may have received EA  
5  
6 196 treatment with deep insertion, or SA treatment with shallow insertion. Then, the  
7  
8 197 participants will be asked to answer the question do you think you have received EA  
9  
10 198 treatment, and choose answer between the options of Yes or No.

11  
12 199 Participants in the WL group will not receive active treatment. After the trial, they  
13  
14 200 will receive 24-session EA treatment mentioned above as compensation.

15  
16 201 Participants in all the three groups will receive handbook of advice on healthcare  
17  
18 202 education and lifestyle modification, concerning exercise, fluid intake, weight loss,  
19  
20 203 smoking and respiratory symptoms, constipation, heavy lifting and urinary tract  
21  
22 204 infection. During the process of the trial, participants are not allowed to take other  
23  
24 205 specialized medication or therapies for UI, such as PFMT or antimuscarinic agents;  
25  
26 206 details should be recorded in case report form (CRF), if used. Any medications that  
27  
28 207 might influence the function of lower urinary tract should also be documented in  
29  
30 208 CRF.

## 31 32 209 **Outcomes**

### 33 34 210 **Primary outcome**

35  
36 211 The primary outcome is the proportion of participants with at least 50% reduction  
37  
38 212 in mean 24-hour stress IEFs from baseline to week 8, measured by 3-day voiding  
39  
40 213 diary. Reduction of at least 50% in IEF is regarded as successful treatment in clinic,<sup>20</sup>  
41  
42 214 and 3-day voiding diary is a reliable and validated tool for UI in both clinic and  
43  
44 215 research, without much burden placed on participants.<sup>21</sup> In 3-day voiding diary, IEF  
45  
46 216 of different types, micturition and nocturia episodes, fluid intake, and pad  
47  
48 217 consumptions will be documented.

### 49 50 218 **Secondary outcomes**

51  
52 219 Secondary outcomes will be measured by 3-day voiding diary, International  
53  
54 220 Consultation on Incontinence Questionnaire-short form (ICIQ-SF) and Overactive  
55  
56 221 Bladder Questionnaire short form (OAB-q SF) at weeks 4, 8, 20 and 32; 1-hour pad  
57  
58 222 test at week 8; and Patient Global Impression of Improvement (PGI-I) at weeks 8 and  
59  
60



223 20 (Figure 2. Study schedule). The specific secondary outcome measures and time  
224 frame are displayed in Table 1 Secondary outcome measures.

225 ICIQ-SF is a validated tool to assess the frequency and severity of UI, and its  
226 influence on QoL in the past 4 weeks<sup>22 23</sup>. The total score of the questionnaire ranges  
227 from 1 to 21, with higher score indicating greater severity of symptoms.

228 OAB-q SF is used to assess the OAB symptom bother and the health-related quality  
229 of life (HRQOL) in the past 4 weeks<sup>24 25</sup>. The domains include coping, concern, sleep  
230 and emotional interactions. The scores are transformed to 0- to 100-point scales, with  
231 higher scores on the symptom bother scale indicating severe symptoms and higher  
232 scores on the HRQOL indicating a better HRQOL.

233 One-hour pad test is the only tool standardized with a set protocol to measure the  
234 urinary leakage<sup>18</sup>. Participants will be instructed to drink 500 ml sodium-free water,  
235 and perform a series of activities including standing and sitting, coughing, running,  
236 picking up a coin and putting hands under water. The leakage amount in one hour will  
237 be measured via pad.<sup>26</sup>

238 PGI-I is a global index, with only one item, used to rate the participants' subjective  
239 perception on symptom improvement. Participants will describe their impression from  
240 very much better to very much worse.<sup>27</sup> Improvement was considered to be clinically  
241 significant if the participant's response is "Much better" or "Very much better".

242 To assess participants' expectations of improvement in UI, at baseline, participants  
243 will be asked how do they expect the UI to be in two months. They will choose the  
244 answer form the options of "Much better", "Better", "Don't know", "Same", and  
245 "Worse".

246 To assess participants' belief that acupuncture might help, both at baseline and  
247 week 4, participants in the EA and SA groups will answer how do they think their  
248 incontinence problem may be helped by acupuncture. They will choose the answer  
249 from the options of "Very ineffective", "Fairly ineffective", "Can't decide",  
250 "Effective", and "Very effective".

1  
2  
3  
4 251 **Safety assessment**

5 252 Adverse events (AEs), associated with the intervention or not, will be monitored  
6  
7 253 and documented by participants and research assistants in Adverse Event Record  
8  
9 254 Form and CRF throughout the trial. Whether the events are related to the treatments  
10  
11 255 will be decided by acupuncturists and related specialists in each site within 24 hours  
12  
13 256 of occurrence. Acupuncture related AEs are defined as following: broken needle,  
14  
15 257 needle phobia, intense pain that is unbearable, bleeding, hematoma, infection or  
16  
17 258 abscess at the needling site, and other discomfort induced by acupuncture, such as  
18  
19 259 pain, nausea, vomiting, palpitation, dizziness, headache, loss of appetite, or insomnia  
20  
21 260 that lasts for one hour or longer after treatment.

22  
23  
24 261 **Quality control**

25  
26 262 To ensure consistency of the study, personnel in recruitment sites will receive  
27  
28 263 extensive training from the principal investigator (ZS Liu) concerning the protocol,  
29  
30 264 manipulating methods of acupuncture and blinding of participants, etc.

31  
32 265 At least two certified acupuncturists (with no less than two-year clinical  
33  
34 266 experience) are needed for rotation in each site, while the 24-session treatment of each  
35  
36 267 participant should be completed by one specific acupuncturist. Additionally, the same  
37  
38 268 participants should be taken charge of by the same research assistant/outcome  
39  
40 269 assessor throughout the trial. They will instruct participants to complete voiding diary,  
41  
42 270 explain the contents of handbook if necessary, and remind the participants of their  
43  
44 271 schedule by phone or we-chat.

45  
46 272 To promote the adherence on lifestyle modification, the research assistants will  
47  
48 273 remind the participants to adjust their lifestyle per the suggestions and record the  
49  
50 274 changes of condition and lifestyle on Lifestyle Record Form every week. On each  
51  
52 275 outcome assessment visit, the forms will be collected and examined by outcome  
53  
54 276 assessors, and recorded in CRF in time.

55  
56 277 All the data collected will be documented in paper CRF first, and typed into EDC  
57  
58 278 system within one week by clinical research coordinator. This rule is set to ensure the  
59  
60

1  
2  
3  
4 279 date be traced back, monitored by the system automatically and clinical research  
5  
6 280 associate, and supplemented without delay, if missing or inaccuracy. In follow-up  
7  
8 281 period, missing data in voiding diary can be asked by phone rather than in person. The  
9  
10 282 database will be protected by a password and only the principal investigator will have  
11  
12 283 access to the final dataset. Data are available upon reasonable request to the principal  
13  
14 284 investigator, excluding the private information of patients.

### 15 16 285 **Sample size**

17  
18 286 Based on our previous study<sup>14 15</sup>, we assume that 25% participants in the SA group  
19  
20 287 will have at least 50% reduction of mean stress IEF from baseline to week 8. To  
21  
22 288 detect a difference of 23% between the EA and SA group, a sample size of 232  
23  
24 289 participants will need to provide the trial with 80% power with a two-sided  
25  
26 290 significance level of 0.05 and 10% dropouts.

### 27 28 291 **Statistical analysis**

29  
30 292 For the primary hypothesis, we will compare the proportion of participants with at  
31  
32 293 least 50% reduction in mean 24-hour stress IEF at week 8 among the three groups.  
33  
34 294 The primary outcome analysis will use the Cochran-Mantel-Haenszel (CMH) test to  
35  
36 295 compare the rate of participants with at least 50% reduction in stress IEF at week 8  
37  
38 296 between the EA group and the WL group. If this analysis is significant, the  
39  
40 297 hierarchical testing will be used the EA group versus the SA group.

41  
42 298 For other categorical variables, comparisons between treatment groups will be  
43  
44 299 assessed using the Fisher exact test or Chi-squared test as appropriate. We will use the  
45  
46 300 *t* test or Wilcoxon rank-sum test to analyze change of urinary leakage amount from  
47  
48 301 baseline, change of mean 24-hour IEF from baseline, change of total and sub-score of  
49  
50 302 ICIQ-SF from baseline, change of 24-h urgency episodes from baseline, and other  
51  
52 303 continuous variables. Chi-square or Fisher's exact tests will be used to compare the  
53  
54 304 frequency of AEs between groups.

55  
56 305 All the outcomes will be analyzed in intention to treat (ITT) population (defined as  
57  
58 306 participants randomized). Analysis will be performed using SAS version 9.4 (SAS

1  
2  
3  
4 307 Institute Inc) with a two-sided  $P$  value of less than .05 considered significant.

5  
6 308 **Ethics and dissemination**

7  
8 309 The protocol has been approved by Guang'anmen Hospital Institutional Review  
9  
10 310 Board (2019-241-KY). It is registered on Clinicaltrials.gov (NCT04299932), and any  
11  
12 311 revision of the protocol will be reported on the website. The trial will be conducted  
13  
14 312 according to the Declaration of Helsinki and the International Conference on  
15  
16 313 Harmonization Good Clinical Practice E6 Guidance for Good Clinical Practice.  
17  
18 314 Detailed information of the trial will be informed to the participants and written  
19  
20 315 informed consent will be obtained from every participant. Participants in the WL  
21  
22 316 group will receive 24-session EA treatment for compensation. Results of the trial are  
23  
24 317 expected to be published on a peer-reviewed journal.

25  
26 318 **DISCUSSION**

27  
28 319 MUI is a condition frustrating almost thirty percent of women globally, while about  
29  
30 320 half of them feel embarrassed to report<sup>3-5</sup>. The physiology underlying MUI remains  
31  
32 321 unclear. UUI is closely associated with physiological perturbations to bladder  
33  
34 322 function, such as detrusor overactivity, poor detrusor compliance and bladder  
35  
36 323 hypersensitivity<sup>11</sup>, while urethral hypermobility resulting from weak pelvic floor or  
37  
38 324 poorly supported urethral sphincter, or intrinsic urethral sphincter deficiency have  
39  
40 325 been proposed as the main pathophysiology of SUI<sup>28</sup>. Electroacupuncture may relieve  
41  
42 326 the symptoms of MUI by modulate the function of related nerves. Acupuncture points  
43  
44 327 of BL 33, BL35 and SP6 are located in the lumbosacral region and posterior tibial  
45  
46 328 region, in the distribution area of sacral plexus and pudendal nerves. Either by direct  
47  
48 329 stimulation or indirect stimulation via sacral roots or plexus, the pudendal afferent can  
49  
50 330 be activated to induce a strong inhibition of the detrusor hyperreflexia and cause  
51  
52 331 detrusor relaxation<sup>29</sup>. Additionally, stimulation of pudendal nerves can contract the  
53  
54 332 pelvic floor muscle and simulate PFMT<sup>30</sup>, which can improve urethral function and  
55  
56 333 relieve SUI symptoms<sup>31</sup>.

57  
58 334 Since plenty of Chinese have received acupuncture before, superficial insertion at  
59  
60

1  
2  
3  
4 335 non-acupuncture point area with minimal and transient electric current is applied as  
5  
6 336 sham control to eliminate placebo effects. The superficial insertion enables  
7  
8 337 participants to percept the stimulation and electric current promptly, and the transient  
9  
10 338 electric current can enhance the blinding even if it lasts only about 30 seconds. It is  
11  
12 339 argued that minimal acupuncture may evoke physiologic effects<sup>32</sup>, especially for pain  
13  
14 340 and depression<sup>33 34</sup>. However, the pathology of MUI is mainly sphincter insufficiency  
15  
16 341 and detrusor overactivity. Studies indicates the rheobase of the normal bladder was 1-  
17  
18 342 5mA<sup>35</sup>. The transient and minimal current output may not produce effects on the  
19  
20 343 function of bladder. In the WL group, participants only receive healthcare education  
21  
22 344 and lifestyle modification. The WL-control is applied to eliminate the influence of  
23  
24 345 disease's natural cause.

25  
26 346 Limitation also exists in the design of this trial. Participants in the WL group and  
27  
28 347 acupuncturists cannot be blinded, which might induce performance and detection bias.  
29  
30 348 However, large bias is unlikely to be attached to the results since the primary outcome  
31  
32 349 of stress IEF is objective. In addition, the outcome assessors will be blinded to group  
33  
34 350 allocation.  
35  
36  
37  
38  
39  
40  
41  
42  
43  
44  
45  
46  
47  
48  
49  
50  
51  
52  
53  
54  
55  
56  
57  
58  
59  
60

1  
2  
3  
4 351 **Ethical Approval and Consent to participate:** The study has received approval  
5  
6 352 from the Guang'anmen Hospital Institutional Review Board (2019-241-KY). Written  
7  
8 353 informed consent will be obtained from every participant.

9  
10 354 **Consent for publication:** Not applicable.

11  
12 355 **Authors' contributions:** Zhishun Liu conceived the study, initiated the design, and  
13  
14 356 revised the manuscript; Yan Liu was responsible for statistical analysis plan and  
15  
16 357 drafted the manuscript; Yuanjie Sun participated the design and drafted the  
17  
18 358 manuscript; Huan Chen participated the design and revised the manuscript; Yan Yan  
19  
20 359 helped to draft the manuscript. All authors have read and approved the final  
21  
22 360 manuscript.

23  
24 361 **Funding statement:** This work is supported by "The 13th Five-year" National  
25  
26 362 Science and Technology Pillar Program (grant number 2017YFC1703602) by the  
27  
28 363 Ministry of Science and Technology of the People's Republic of China. They have no  
29  
30 364 role in study design and will have no role in collection, management, analysis, and  
31  
32 365 interpretation of data; writing of the report; and the decision to submit the report for  
33  
34 366 publication.

35  
36 367 **Competing interests:** The author declare that they have no competing interests.

37  
38 368 **Acknowledgements:** Appreciation to every participant in the trial and every  
39  
40 369 personnel in recruitment sites for their contributions.  
41  
42  
43  
44  
45  
46  
47  
48  
49  
50  
51  
52  
53  
54  
55  
56  
57  
58  
59  
60

371 **Reference:**

- 372 1. Haylen BT, de Ridder D, Freeman RM, et al. An International Urogynecological  
373 Association (IUGA)/International Continence Society (ICS) joint report on the  
374 terminology for female pelvic floor dysfunction. *Neurourol Urodyn* 2010;29(1):4-20.  
375 doi: 10.1002/nau.20798 [published Online First: 2009/11/27]
- 376 2. Minassian VA, Devore E, Hagan K, et al. Severity of urinary incontinence and  
377 effect on quality of life in women by incontinence type. *Obstet Gynecol*  
378 2013;121(5):1083-90. doi: 10.1097/AOG.0b013e31828ca761 [published Online First:  
379 2013/05/03]
- 380 3. Dooley Y, Lowenstein L, Kenton K, et al. Mixed incontinence is more bothersome  
381 than pure incontinence subtypes. *Int Urogynecol J Pelvic Floor Dysfunct*  
382 2008;19(10):1359-62. doi: 10.1007/s00192-008-0637-4 [published Online First:  
383 2008/05/21]
- 384 4. Zhu L, Li L, Lang J, et al. Epidemiology of mixed urinary incontinence in China.  
385 *Int J Gynaecol Obstet* 2010;109(1):55-8. doi: 10.1016/j.ijgo.2009.10.017 [published  
386 Online First: 2009/12/22]
- 387 5. Thom DH, van den Eeden SK, Ragins AI, et al. Differences in Prevalence of  
388 Urinary Incontinence by Race/Ethnicity. *Journal of Urology* 2006;175(1):259-64. doi:  
389 10.1016/s0022-5347(05)00039-x
- 390 6. Myers DL. Female mixed urinary incontinence: a clinical review. *JAMA*  
391 2014;311(19):2007-14. doi: 10.1001/jama.2014.4299 [published Online First:  
392 2014/05/23]
- 393 7. Burkhard FC, Bosch JLHR, Cruz F, et al. EAU guidelines on urinary incontinence  
394 in adults. <https://uroweb.org/guideline/urinary-incontinence>. Accessed November 4,  
395 2017.
- 396 8. Dumoulin C, Cacciari LP, Hay-Smith EJC. Pelvic floor muscle training versus no  
397 treatment, or inactive control treatments, for urinary incontinence in women.  
398 *Cochrane Database Syst Rev* 2018;10:CD005654. doi:

- 1  
2  
3  
4 399 10.1002/14651858.CD005654.pub4 [published Online First: 2018/10/06]  
5  
6 400 9. Bo K, Kvarstein B, Nygaard I. Lower urinary tract symptoms and pelvic floor  
7  
8 401 muscle exercise adherence after 15 years. *Obstet Gynecol* 2005;105(5 Pt 1):999-1005.  
9  
10 402 doi: 10.1097/01.AOG.0000157207.95680.6d [published Online First: 2005/05/03]  
11  
12 403 10. Labrie J, Berghmans BL, Fischer K, et al. Surgery versus physiotherapy for stress  
13  
14 404 urinary incontinence. *New Engl J Med* 2013;369(12):1124-33. doi:  
15  
16 405 10.1056/NEJMoa1210627 [published Online First: 2013/09/21]  
17  
18 406 11. Aoki Y, Brown HW, Brubaker L, et al. Urinary incontinence in women. *Nat Rev*  
19  
20 407 *Dis Primers* 2017;3:17042. doi: 10.1038/nrdp.2017.42 [published Online First:  
21  
22 408 2017/07/07]  
23  
24 409 12. Lee JK, Dwyer PL, Rosamilia A, et al. Persistence of urgency and urge urinary  
25  
26 410 incontinence in women with mixed urinary symptoms after midurethral slings: a  
27  
28 411 multivariate analysis. *BJOG* 2011;118(7):798-805. doi: 10.1111/j.1471-  
29  
30 412 0528.2011.02915.x [published Online First: 2011/03/12]  
31  
32 413 13. Richter HE, Litman HJ, Lukacz ES, et al. Demographic and clinical predictors of  
33  
34 414 treatment failure one year after midurethral sling surgery. *Obstet Gynecol*  
35  
36 415 2011;117(4):913-21. doi: 10.1097/AOG.0b013e31820f3892 [published Online First:  
37  
38 416 2011/03/23]  
39  
40 417 14. Liu Z, Liu Y, Xu H, et al. Effect of Electroacupuncture on Urinary Leakage  
41  
42 418 Among Women With Stress Urinary Incontinence: A Randomized Clinical Trial.  
43  
44 419 *JAMA* 2017;317(24):2493-501. doi: 10.1001/jama.2017.7220 [published Online  
45  
46 420 First: 2017/06/28]  
47  
48 421 15. Liu B, Liu Y, Qin Z, et al. Electroacupuncture Versus Pelvic Floor Muscle  
49  
50 422 Training Plus Solifenacin for Women With Mixed Urinary Incontinence: A  
51  
52 423 Randomized Noninferiority Trial. *Mayo Clin Proc* 2019;94(1):54-65. doi:  
53  
54 424 10.1016/j.mayocp.2018.07.021 [published Online First: 2019/01/07]  
55  
56 425 16. Wang W, Liu Y, Su T, et al. Comparing the effect of electroacupuncture treatment  
57  
58 426 on obese and non-obese women with stress urinary incontinence or stress-



- 1  
2  
3  
4 427 predominant mixed urinary incontinence: A secondary analysis of two randomised  
5  
6 428 controlled trials. *Int J Clin Pract* 2019:e13435. doi: 10.1111/ijcp.13435 [published  
7  
8 429 Online First: 2019/10/18]
- 9  
10 430 17. Herzog AR, Diokno AC, Brown MB, et al. Two-year incidence, remission, and  
11  
12 431 change patterns of urinary incontinence in noninstitutionalized older adults. *J*  
13  
14 432 *Gerontol* 1990;45(2):M67-74. doi: 10.1093/geronj/45.2.m67 [published Online First:  
15  
16 433 1990/03/01]
- 17  
18 434 18. Krhut J, Zachoval R, Smith PP, et al. Pad weight testing in the evaluation of  
19  
20 435 urinary incontinence. *Neurourol Urodyn* 2014;33(5):507-10. doi: 10.1002/nau.22436  
21  
22 436 [published Online First: 2013/06/26]
- 23  
24 437 19. WHO Regional Office for the Western Pacific. WHO Standard Acupuncture Point  
25  
26 438 Locations in the Western Pacific Region. Geneva: World Health Organization Pr;  
27  
28 439 2008.
- 29  
30 440 20. Yalcin I, Peng G, Viktrup L, et al. Reductions in stress urinary incontinence  
31  
32 441 episodes: what is clinically important for women? *Neurourol Urodyn* 2010;29(3):344-  
33  
34 442 7. doi: 10.1002/nau.20744 [published Online First: 2009/05/29]
- 35  
36 443 21. Bright E, Cotterill N, Drake M, et al. Developing and validating the International  
37  
38 444 Consultation on Incontinence Questionnaire bladder diary. *Eur Urol* 2014;66(2):294-  
39  
40 445 300. doi: 10.1016/j.eururo.2014.02.057 [published Online First: 2014/03/22]
- 41  
42 446 22. Huang L, Zhang SW, Wu SL, et al. The Chinese version of ICIQ: a useful tool in  
43  
44 447 clinical practice and research on urinary incontinence. *Neurourol Urodyn*  
45  
46 448 2008;27(6):522-4. doi: 10.1002/nau.20546 [published Online First: 2008/03/21]
- 47  
48 449 23. Avery K, Donovan J, Peters TJ, et al. ICIQ: a brief and robust measure for  
49  
50 450 evaluating the symptoms and impact of urinary incontinence. *Neurourol Urodyn*  
51  
52 451 2004;23(4):322-30. doi: 10.1002/nau.20041 [published Online First: 2004/07/01]
- 53  
54 452 24. McKown S, Abraham L, Coyne K, et al. Linguistic validation of the N-QOL  
55  
56 453 (ICIQ), OAB-q (ICIQ), PPBC, OAB-S and ICIQ-MLUTSsex questionnaires in 16  
57  
58 454 languages. *Int J Clin Pract* 2010;64(12):1643-52. doi: 10.1111/j.1742-

- 1  
2  
3  
4 455 1241.2010.02489.x [published Online First: 2010/08/21]  
5  
6 456 25. Coyne KS, Thompson CL, Lai JS, et al. An overactive bladder symptom and  
7  
8 457 health-related quality of life short-form: validation of the OAB-q SF. *Neurourol*  
9  
10 458 *Urodyn* 2015;34(3):255-63. doi: 10.1002/nau.22559 [published Online First:  
11  
12 459 2015/03/19]  
13  
14 460 26. Abrams P, Blaivas JG, Stanton SL, et al. Standardisation of terminology of lower  
15  
16 461 urinary tract function. *Neurourology and Urodynamics* 1988;7(5):403-27. doi:  
17  
18 462 10.1002/nau.1930070502  
19  
20 463 27. Viktrup L, Hayes RP, Wang P, et al. Construct validation of patient global  
21  
22 464 impression of severity (PGI-S) and improvement (PGI-I) questionnaires in the  
23  
24 465 treatment of men with lower urinary tract symptoms secondary to benign prostatic  
25  
26 466 hyperplasia. *BMC Urol* 2012;12:30. doi: 10.1186/1471-2490-12-30 [published Online  
27  
28 467 First: 2012/11/09]  
29  
30 468 28. Yoshimura N, Miyazato M. Neurophysiology and therapeutic receptor targets for  
31  
32 469 stress urinary incontinence. *International Journal of Urology* 2012;19(6):524-37. doi:  
33  
34 470 10.1111/j.1442-2042.2012.02976.x  
35  
36 471 29. Bosch JL. Electrical neuromodulatory therapy in female voiding dysfunction. *BJU*  
37  
38 472 *Int* 2006;98 Suppl 1:43-8; discussion 49. doi: 10.1111/j.1464-410X.2006.06316.x  
39  
40 473 [published Online First: 2006/08/17]  
41  
42 474 30. Wang S, Zhang S. Simultaneous perineal ultrasound and vaginal pressure  
43  
44 475 measurement prove the action of electrical pudendal nerve stimulation in treating  
45  
46 476 female stress incontinence. *BJU Int* 2012;110(9):1338-43. doi: 10.1111/j.1464-  
47  
48 477 410X.2012.11029.x [published Online First: 2012/03/16]  
49  
50 478 31. Deng K, Balog BM, Lin DL, et al. Daily bilateral pudendal nerve electrical  
51  
52 479 stimulation improves recovery from stress urinary incontinence. *Interface Focus*  
53  
54 480 2019;9(4):20190020. doi: 10.1098/rsfs.2019.0020 [published Online First:  
55  
56 481 2019/07/03]  
57  
58 482 32. Lund I, Naslund J, Lundeberg T. Minimal acupuncture is not a valid placebo  
59  
60

- 1  
2  
3  
4 483 control in randomised controlled trials of acupuncture: a physiologist's perspective.  
5  
6 484 Chin Med 2009;4:1. doi: 10.1186/1749-8546-4-1 [published Online First:  
7  
8 485 2009/02/03]  
9  
10 486 33. Smith CA, Armour M, Lee MS, et al. Acupuncture for depression. Cochrane  
11  
12 487 Database Syst Rev 2018;3:CD004046. doi: 10.1002/14651858.CD004046.pub4  
13  
14 488 [published Online First: 2018/03/05]  
15  
16 489 34. Vickers AJ, Cronin AM, Maschino AC, et al. Acupuncture for chronic pain:  
17  
18 490 individual patient data meta-analysis. Arch Intern Med 2012;172(19):1444-53. doi:  
19  
20 491 10.1001/archinternmed.2012.3654 [published Online First: 2012/09/12]  
21  
22 492 35. Katona F. Stages of vegetative afferentation in reorganization of bladder control  
23  
24 493 during intravesical electrotherapy. Urol Int 1975;30(3):192-203. doi:  
25  
26 494 10.1159/000279979 [published Online First: 1975/01/01]  
27  
28  
29  
30  
31  
32  
33  
34  
35  
36  
37  
38  
39  
40  
41  
42  
43  
44  
45  
46  
47  
48  
49  
50  
51  
52  
53  
54  
55  
56  
57  
58  
59  
60

## Figure legends

Figure 1. Flow chart

Figure 2. Study schedule

\* Only for participants in electroacupuncture and sham electroacupuncture groups

ICIQ-SF, International Consultation on Incontinence Questionnaire short form; OAB-q SF, Overactive Bladder Questionnaire short form; PGI-I, Patient Global Impression of Improvement.

## Table

Table 1. Secondary outcome measures

| No | Outcome measure                                                                                                              | Time Frame            |
|----|------------------------------------------------------------------------------------------------------------------------------|-----------------------|
| 1  | Proportion of participants with at least 50% reduction of urinary leakage amount from baseline.                              | week 8                |
| 2  | Change of urinary leakage amount from baseline                                                                               | week 8                |
| 3  | Proportion of participants with at least 50% reduction of mean 24-hour stress IEF from baseline.                             | weeks 4, 20 and 32    |
| 4  | Change of mean 24-hour IEF from baseline                                                                                     | weeks 4, 8, 20 and 32 |
| 5  | Change of mean 24-hour stress IEF from baseline                                                                              | weeks 4, 8, 20 and 32 |
| 6  | Proportion of participants with at least 50% reduction of mean 24-hour IEF from baseline                                     | weeks 4, 8, 20 and 32 |
| 7  | Change of total and sub-score of International Consultation on Incontinence Questionnaire-short form (ICIQ-SF) from baseline | weeks 4, 8, 20 and 32 |
| 8  | Change of total and sub-score of Overactive Bladder Questionnaire short form (OAB-q SF) from baseline                        | weeks 4, 8, 20 and 32 |
| 9  | Change of mean 24-hour pad consumption from baseline                                                                         | weeks 4, 8, 20 and 32 |
| 10 | Proportion of participants with adequate improvement assessed by Patient global impression improvement (PGI-I)               | weeks 8 and 20        |
| 11 | Change of mean 24-hour urgency episodes from baseline                                                                        | weeks 4, 8, 20 and 32 |
| 12 | Change of mean 24-hour micturition episodes from baseline                                                                    | weeks 4, 8, 20 and 32 |
| 13 | Participants' expectations of improvement to urinary incontinence                                                            | Baseline              |
| 14 | Participants' belief that acupuncture might help                                                                             | Baseline and week 4   |

1  
2  
3  
4  
5  
6  
7  
8  
9  
10  
11  
12  
13  
14  
15  
16  
17  
18  
19  
20  
21  
22  
23  
24  
25  
26  
27  
28  
29  
30  
31  
32  
33  
34  
35  
36  
37  
38  
39  
40  
41  
42  
43  
44  
45  
46  
47  
48  
49  
50  
51  
52  
53  
54  
55  
56  
57  
58  
59  
60

---

|    |                     |        |
|----|---------------------|--------|
| 15 | Blinding assessment | Week 8 |
|----|---------------------|--------|

---

For peer review only

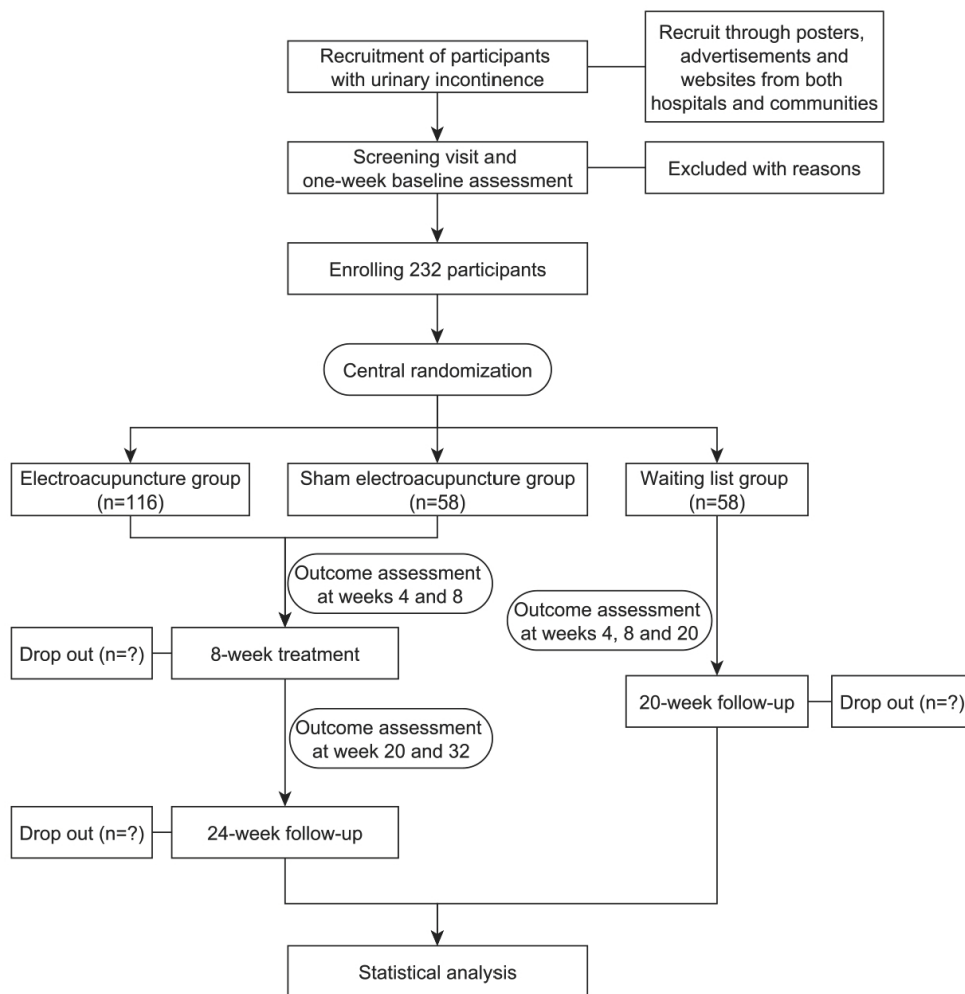

Figure 1. Flow chart

91x93mm (350 x 350 DPI)

| TIMEPOINT (W, week)        | W -1 | W 0 | W 4 | W 8 | W 20 | W 32* |
|----------------------------|------|-----|-----|-----|------|-------|
| <b>ENROLMENT</b>           |      |     |     |     |      |       |
| Eligibility screen         | ×    |     |     |     |      |       |
| Informed consent           | ×    |     |     |     |      |       |
| Allocation                 |      | ×   |     |     |      |       |
| Demography characteristics | ×    |     |     |     |      |       |
| Medical history            | ×    |     |     |     |      |       |
| Urine routine              | ×    |     |     |     |      |       |
| Residual urine volume      | ×    |     |     |     |      |       |
| Urine pregnancy test       | ×    |     |     |     |      |       |
| <b>INTERVENTIONS</b>       |      |     |     |     |      |       |
| Electroacupuncture         |      |     | ×   | ×   |      |       |
| Sham electroacupuncture    |      |     | ×   | ×   |      |       |
| Waiting list               |      |     | ×   | ×   | ×    |       |
| <b>ASSESSMENTS</b>         |      |     |     |     |      |       |
| 3-day voiding diary        | ×    |     | ×   | ×   | ×    | ×     |
| 1-hour pad test            | ×    |     |     | ×   |      |       |
| ICIQ-SF                    |      | ×   | ×   | ×   | ×    | ×     |
| OAB-q SF                   |      | ×   | ×   | ×   | ×    | ×     |
| PGI-I                      |      |     |     | ×   | ×    |       |
| Adverse events             | ×    | ×   | ×   | ×   | ×    | ×     |
| Expectation assessment     |      | ×   |     |     |      |       |
| Belief assessment*         |      | ×   | ×   |     |      |       |
| Blindness assessment*      |      |     |     | ×   |      |       |

Figure 2. Study schedule

\* Only for participants in the electroacupuncture and sham electroacupuncture groups  
 ICIQ-SF, International Consultation on Incontinence Questionnaire short form; OAB-q SF, Overactive Bladder Questionnaire short form; PGI-I, Patient Global Impression of Improvement.

91x94mm (350 x 350 DPI)

Table 1

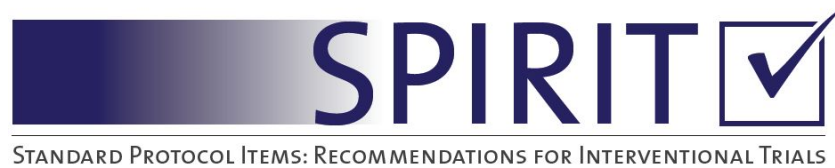

SPIRIT 2013 Checklist: Recommended items to address in a clinical trial protocol and related documents\*

| Section/item                      | Item No | Description                                                                                                                                                                                                                                                                              | Addressed on page number |
|-----------------------------------|---------|------------------------------------------------------------------------------------------------------------------------------------------------------------------------------------------------------------------------------------------------------------------------------------------|--------------------------|
| <b>Administrative information</b> |         |                                                                                                                                                                                                                                                                                          |                          |
| Title                             | 1       | Descriptive title identifying the study design, population, interventions, and, if applicable, trial acronym                                                                                                                                                                             | 1                        |
| Trial registration                | 2a      | Trial identifier and registry name. If not yet registered, name of intended registry                                                                                                                                                                                                     | 2                        |
|                                   | 2b      | All items from the World Health Organization Trial Registration Data Set                                                                                                                                                                                                                 | 5-12                     |
| Protocol version                  | 3       | Date and version identifier                                                                                                                                                                                                                                                              | 2                        |
| Funding                           | 4       | Sources and types of financial, material, and other support                                                                                                                                                                                                                              | 15                       |
| Roles and responsibilities        | 5a      | Names, affiliations, and roles of protocol contributors                                                                                                                                                                                                                                  | 1,15                     |
|                                   | 5b      | Name and contact information for the trial sponsor                                                                                                                                                                                                                                       | 15                       |
|                                   | 5c      | Role of study sponsor and funders, if any, in study design; collection, management, analysis, and interpretation of data; writing of the report; and the decision to submit the report for publication, including whether they will have ultimate authority over any of these activities | 15                       |
|                                   | 5d      | Composition, roles, and responsibilities of the coordinating centre, steering committee, endpoint adjudication committee, data management team, and other individuals or groups overseeing the trial, if applicable (see Item 21a for data monitoring committee)                         | NA                       |



## Introduction

|                          |    |                                                                                                                                                                                                           |     |
|--------------------------|----|-----------------------------------------------------------------------------------------------------------------------------------------------------------------------------------------------------------|-----|
| Background and rationale | 6a | Description of research question and justification for undertaking the trial, including summary of relevant studies (published and unpublished) examining benefits and harms for each intervention        | 4-5 |
|                          | 6b | Explanation for choice of comparators                                                                                                                                                                     | 14  |
| Objectives               | 7  | Specific objectives or hypotheses                                                                                                                                                                         | 4-5 |
| Trial design             | 8  | Description of trial design including type of trial (eg, parallel group, crossover, factorial, single group), allocation ratio, and framework (eg, superiority, equivalence, noninferiority, exploratory) | 5   |

## Methods: Participants, interventions, and outcomes

|                      |     |                                                                                                                                                                                                                                                                                                                                                                                |               |
|----------------------|-----|--------------------------------------------------------------------------------------------------------------------------------------------------------------------------------------------------------------------------------------------------------------------------------------------------------------------------------------------------------------------------------|---------------|
| Study setting        | 9   | Description of study settings (eg, community clinic, academic hospital) and list of countries where data will be collected. Reference to where list of study sites can be obtained                                                                                                                                                                                             | 5             |
| Eligibility criteria | 10  | Inclusion and exclusion criteria for participants. If applicable, eligibility criteria for study centres and individuals who will perform the interventions (eg, surgeons, psychotherapists)                                                                                                                                                                                   | 5-7           |
| Interventions        | 11a | Interventions for each group with sufficient detail to allow replication, including how and when they will be administered                                                                                                                                                                                                                                                     | 7-9           |
|                      | 11b | Criteria for discontinuing or modifying allocated interventions for a given trial participant (eg, drug dose change in response to harms, participant request, or improving/worsening disease)                                                                                                                                                                                 | 9             |
|                      | 11c | Strategies to improve adherence to intervention protocols, and any procedures for monitoring adherence (eg, drug tablet return, laboratory tests)                                                                                                                                                                                                                              | 11            |
|                      | 11d | Relevant concomitant care and interventions that are permitted or prohibited during the trial                                                                                                                                                                                                                                                                                  | 9             |
| Outcomes             | 12  | Primary, secondary, and other outcomes, including the specific measurement variable (eg, systolic blood pressure), analysis metric (eg, change from baseline, final value, time to event), method of aggregation (eg, median, proportion), and time point for each outcome. Explanation of the clinical relevance of chosen efficacy and harm outcomes is strongly recommended | 9-11, Table 1 |

|                      |    |                                                                                                                                                                                       |          |
|----------------------|----|---------------------------------------------------------------------------------------------------------------------------------------------------------------------------------------|----------|
| Participant timeline | 13 | Time schedule of enrolment, interventions (including any run-ins and washouts), assessments, and visits for participants. A schematic diagram is highly recommended (see Figure)      | Figure 2 |
| Sample size          | 14 | Estimated number of participants needed to achieve study objectives and how it was determined, including clinical and statistical assumptions supporting any sample size calculations | 12       |
| Recruitment          | 15 | Strategies for achieving adequate participant enrolment to reach target sample size                                                                                                   | 5,7      |

### Methods: Assignment of interventions (for controlled trials)

#### Allocation:

|                                  |     |                                                                                                                                                                                                                                                                                                                                                          |    |
|----------------------------------|-----|----------------------------------------------------------------------------------------------------------------------------------------------------------------------------------------------------------------------------------------------------------------------------------------------------------------------------------------------------------|----|
| Sequence generation              | 16a | Method of generating the allocation sequence (eg, computer-generated random numbers), and list of any factors for stratification. To reduce predictability of a random sequence, details of any planned restriction (eg, blocking) should be provided in a separate document that is unavailable to those who enrol participants or assign interventions | 7  |
| Allocation concealment mechanism | 16b | Mechanism of implementing the allocation sequence (eg, central telephone; sequentially numbered, opaque, sealed envelopes), describing any steps to conceal the sequence until interventions are assigned                                                                                                                                                | 7  |
| Implementation                   | 16c | Who will generate the allocation sequence, who will enrol participants, and who will assign participants to interventions                                                                                                                                                                                                                                | 7  |
| Blinding (masking)               | 17a | Who will be blinded after assignment to interventions (eg, trial participants, care providers, outcome assessors, data analysts), and how                                                                                                                                                                                                                | 7  |
|                                  | 17b | If blinded, circumstances under which unblinding is permissible, and procedure for revealing a participant's allocated intervention during the trial                                                                                                                                                                                                     | NA |

### Methods: Data collection, management, and analysis

|                         |     |                                                                                                                                                                                                                                                                                                                                                                                                              |      |
|-------------------------|-----|--------------------------------------------------------------------------------------------------------------------------------------------------------------------------------------------------------------------------------------------------------------------------------------------------------------------------------------------------------------------------------------------------------------|------|
| Data collection methods | 18a | Plans for assessment and collection of outcome, baseline, and other trial data, including any related processes to promote data quality (eg, duplicate measurements, training of assessors) and a description of study instruments (eg, questionnaires, laboratory tests) along with their reliability and validity, if known. Reference to where data collection forms can be found, if not in the protocol | 9-12 |
|-------------------------|-----|--------------------------------------------------------------------------------------------------------------------------------------------------------------------------------------------------------------------------------------------------------------------------------------------------------------------------------------------------------------------------------------------------------------|------|

|    |             |     |                                                                                     |
|----|-------------|-----|-------------------------------------------------------------------------------------|
| 1  |             |     |                                                                                     |
| 2  |             |     |                                                                                     |
| 3  |             |     |                                                                                     |
| 4  |             |     |                                                                                     |
| 5  |             | 18b | Plans to promote participant retention and complete follow-up, including list 11-12 |
| 6  |             |     | of any outcome data to be collected for participants who discontinue or             |
| 7  |             |     | deviate from intervention protocols                                                 |
| 8  |             |     |                                                                                     |
| 9  |             |     |                                                                                     |
| 10 | Data        | 19  | Plans for data entry, coding, security, and storage, including any related 11-12    |
| 11 | management  |     | processes to promote data quality (eg, double data entry; range checks for          |
| 12 |             |     | data values). Reference to where details of data management procedures              |
| 13 |             |     | can be found, if not in the protocol                                                |
| 14 |             |     |                                                                                     |
| 15 | Statistical | 20a | Statistical methods for analysing primary and secondary outcomes. 12                |
| 16 | methods     |     | Reference to where other details of the statistical analysis plan can be            |
| 17 |             |     | found, if not in the protocol                                                       |
| 18 |             |     |                                                                                     |
| 19 |             |     |                                                                                     |
| 20 |             | 20b | Methods for any additional analyses (eg, subgroup and adjusted analyses) NA         |
| 21 |             |     |                                                                                     |
| 22 |             | 20c | Definition of analysis population relating to protocol non-adherence (eg, as        |
| 23 |             |     | randomised analysis), and any statistical methods to handle missing data 12         |
| 24 |             |     | (eg, multiple imputation)                                                           |
| 25 |             |     |                                                                                     |
| 26 |             |     |                                                                                     |

## Methods: Monitoring

|    |            |     |                                                                                |
|----|------------|-----|--------------------------------------------------------------------------------|
| 27 |            |     |                                                                                |
| 28 |            |     |                                                                                |
| 29 | Data       | 21a | Composition of data monitoring committee (DMC); summary of its role and NA     |
| 30 | monitoring |     | reporting structure; statement of whether it is independent from the sponsor   |
| 31 |            |     | and competing interests; and reference to where further details about its      |
| 32 |            |     | charter can be found, if not in the protocol. Alternatively, an explanation of |
| 33 |            |     | why a DMC is not needed                                                        |
| 34 |            |     |                                                                                |
| 35 |            |     |                                                                                |
| 36 |            | 21b | Description of any interim analyses and stopping guidelines, including who NA  |
| 37 |            |     | will have access to these interim results and make the final decision to       |
| 38 |            |     | terminate the trial                                                            |
| 39 |            |     |                                                                                |
| 40 | Harms      | 22  | Plans for collecting, assessing, reporting, and managing solicited and 10-11   |
| 41 |            |     | spontaneously reported adverse events and other unintended effects of          |
| 42 |            |     | trial interventions or trial conduct                                           |
| 43 |            |     |                                                                                |
| 44 |            |     |                                                                                |
| 45 | Auditing   | 23  | Frequency and procedures for auditing trial conduct, if any, and whether NA    |
| 46 |            |     | the process will be independent from investigators and the sponsor             |
| 47 |            |     |                                                                                |

## Ethics and dissemination

|    |          |    |                                                                              |
|----|----------|----|------------------------------------------------------------------------------|
| 48 |          |    |                                                                              |
| 49 |          |    |                                                                              |
| 50 | Research | 24 | Plans for seeking research ethics committee/institutional review board 13,15 |
| 51 | ethics   |    | (REC/IRB) approval                                                           |
| 52 | approval |    |                                                                              |
| 53 |          |    |                                                                              |
| 54 |          |    |                                                                              |
| 55 |          |    |                                                                              |
| 56 |          |    |                                                                              |
| 57 |          |    |                                                                              |
| 58 |          |    |                                                                              |
| 59 |          |    |                                                                              |
| 60 |          |    |                                                                              |

|    |                   |     |                                                                                   |         |
|----|-------------------|-----|-----------------------------------------------------------------------------------|---------|
| 1  |                   |     |                                                                                   |         |
| 2  |                   |     |                                                                                   |         |
| 3  |                   |     |                                                                                   |         |
| 4  |                   |     |                                                                                   |         |
| 5  | Protocol          | 25  | Plans for communicating important protocol modifications (eg, changes to          | 13      |
| 6  | amendments        |     | eligibility criteria, outcomes, analyses) to relevant parties (eg, investigators, |         |
| 7  |                   |     | REC/IRBs, trial participants, trial registries, journals, regulators)             |         |
| 8  |                   |     |                                                                                   |         |
| 9  | Consent or        | 26a | Who will obtain informed consent or assent from potential trial participants      | 13      |
| 10 | assent            |     | or authorised surrogates, and how (see Item 32)                                   |         |
| 11 |                   |     |                                                                                   |         |
| 12 |                   | 26b | Additional consent provisions for collection and use of participant data and      | NA      |
| 13 |                   |     | biological specimens in ancillary studies, if applicable                          |         |
| 14 |                   |     |                                                                                   |         |
| 15 |                   |     |                                                                                   |         |
| 16 | Confidentiality   | 27  | How personal information about potential and enrolled participants will be        | 11-12   |
| 17 |                   |     | collected, shared, and maintained in order to protect confidentiality before,     |         |
| 18 |                   |     | during, and after the trial                                                       |         |
| 19 |                   |     |                                                                                   |         |
| 20 | Declaration of    | 28  | Financial and other competing interests for principal investigators for the       | 15      |
| 21 | interests         |     | overall trial and each study site                                                 |         |
| 22 |                   |     |                                                                                   |         |
| 23 |                   |     |                                                                                   |         |
| 24 | Access to         | 29  | Statement of who will have access to the final trial dataset, and disclosure      | 11-12   |
| 25 | data              |     | of contractual agreements that limit such access for investigators                |         |
| 26 |                   |     |                                                                                   |         |
| 27 | Ancillary and     | 30  | Provisions, if any, for ancillary and post-trial care, and for compensation to    | 9,13    |
| 28 | post-trial care   |     | those who suffer harm from trial participation                                    |         |
| 29 |                   |     |                                                                                   |         |
| 30 | Dissemination     | 31a | Plans for investigators and sponsor to communicate trial results to               | 12      |
| 31 | policy            |     | participants, healthcare professionals, the public, and other relevant groups     |         |
| 32 |                   |     | (eg, via publication, reporting in results databases, or other data sharing       |         |
| 33 |                   |     | arrangements), including any publication restrictions                             |         |
| 34 |                   |     |                                                                                   |         |
| 35 |                   |     |                                                                                   |         |
| 36 |                   | 31b | Authorship eligibility guidelines and any intended use of professional            | NA      |
| 37 |                   |     | writers                                                                           |         |
| 38 |                   |     |                                                                                   |         |
| 39 |                   | 31c | Plans, if any, for granting public access to the full protocol, participant-level | 11-12   |
| 40 |                   |     | dataset, and statistical code                                                     |         |
| 41 |                   |     |                                                                                   |         |
| 42 |                   |     |                                                                                   |         |
| 43 | <b>Appendices</b> |     |                                                                                   |         |
| 44 |                   |     |                                                                                   |         |
| 45 | Informed          | 32  | Model consent form and other related documentation given to participants          | Content |
| 46 | consent           |     | and authorised surrogates                                                         | inform  |
| 47 | materials         |     |                                                                                   |         |
| 48 |                   |     |                                                                                   |         |
| 49 | Biological        | 33  | Plans for collection, laboratory evaluation, and storage of biological            | NA      |
| 50 | specimens         |     | specimens for genetic or molecular analysis in the current trial and for          |         |
| 51 |                   |     | future use in ancillary studies, if applicable                                    |         |
| 52 |                   |     |                                                                                   |         |
| 53 |                   |     |                                                                                   |         |
| 54 |                   |     |                                                                                   |         |
| 55 |                   |     |                                                                                   |         |
| 56 |                   |     |                                                                                   |         |
| 57 |                   |     |                                                                                   |         |
| 58 |                   |     |                                                                                   |         |
| 59 |                   |     |                                                                                   |         |
| 60 |                   |     |                                                                                   |         |

1  
2  
3  
4  
5 \*It is strongly recommended that this checklist be read in conjunction with the SPIRIT 2013 Explanation &  
6 Elaboration for important clarification on the items. Amendments to the protocol should be tracked and dated.  
7 The SPIRIT checklist is copyrighted by the SPIRIT Group under the Creative Commons "[Attribution-  
8 NonCommercial-NoDerivs 3.0 Unported](#)" license.  
9  
10  
11  
12  
13  
14  
15  
16  
17  
18  
19  
20  
21  
22  
23  
24  
25  
26  
27  
28  
29  
30  
31  
32  
33  
34  
35  
36  
37  
38  
39  
40  
41  
42  
43  
44  
45  
46  
47  
48  
49  
50  
51  
52  
53  
54  
55  
56  
57  
58  
59  
60
